# Supplementary material for: Trypanosoma cruzi transcriptome during axenic epimastigote growth curve
Source: PubMed Central journal article supplement (PMC5907844; doi:10.1590/0074-02760170404), 2018-04-03
Supplement: 0074-0276-mioc-113-5-e170404-suppl01.pdf [file 0074-0276-mioc-113-5-e170404-suppl01.pdf]

TABLE I  
 RNA total sequencing data from SOLiD platform. Total number of reads generated,  
 mapped genes and percentage ratio between reads number and mapped genes

| Sample | Reads      | Mapped genes | (%)   |
|--------|------------|--------------|-------|
| R1 d1  | 25,914,424 | 3,761,994    | 14.5% |
| R2 d1  | 14,423,190 | 4,365,746    | 30.3% |
| R3 d1  | 15,193,196 | 5,667,094    | 37.3% |
| R1 d2  | 8,009,108  | 1,267,551    | 15.8% |
| R2 d2  | 13,567,040 | 4,399,547    | 32.4% |
| R3 d2  | 13,511,044 | 4,939,298    | 36.6% |
| R1 d3  | 28,114,654 | 8,124,908    | 28.9% |
| R2 d3  | 9,197,397  | 2,038,984    | 22.2% |
| R3 d3  | 27,552,854 | 9,998,374    | 36.3% |
| R1 d4  | 7,240,263  | 1,358,227    | 18.8% |
| R2 d4  | 10,431,269 | 1,378,185    | 13.2% |
| R3 d4  | 13,559,166 | 5,273,825    | 38.9% |
| R1 d5  | 11,054,831 | 1,297,336    | 11.7% |
| R2 d5  | 9,393,150  | 3,480,423    | 37.1% |
| R1 d6  | 7,028,547  | 802,985      | 11.4% |
| R2 d6  | 12,316,046 | 1,685,044    | 13.7% |
| R3 d6  | 19,433,111 | 7,036,615    | 36.2% |
| R1 d7  | 18,592,523 | 6,771,367    | 36.4% |
| R2 d7  | 12,108,683 | 2,809,495    | 23.2% |
| R3 d7  | 14,299,758 | 4,879,346    | 34.1% |
| R1 d8  | 10,979,175 | 4,552,584    | 41.5% |
| R2 d8  | 11,003,776 | 4,593,353    | 41.7% |
| R3 d8  | 31,069,371 | 8,087,033    | 26.0% |
| R1 d9  | 6,491,121  | 2,277,764    | 35.1% |
| R2 d9  | 28,091,980 | 8,322,228    | 29.6% |
| R3 d9  | 12,397,971 | 2,787,894    | 22.5% |
| R1 d10 | 7,418,750  | 2,580,280    | 34.8% |
| R2 d10 | 26,134,377 | 9,344,508    | 35.8% |
| R3 d10 | 30,624,996 | 9,392,500    | 30.7% |

R: biological replicates; d: day of growth.

TABLE II  
RNA polysomal sequencing data from SOLiD platform. Total number of reads generated, mapped genes and percentage ratio between reads number and mapped genes

| Sample | Reads       | Mapped genes | (%)   |
|--------|-------------|--------------|-------|
| R1 d1  | 26,629,052  | 625,439      | 2.3%  |
| R2 d1  | 13,035,689  | 5,478,569    | 42.0% |
| R3 d1  | 14,258,745  | 5,500,564    | 38.6% |
| R1 d2  | 11,878,544  | 4,395,924    | 37.0% |
| R2 d2  | 15,400,642  | 5,638,885    | 36.6% |
| R2 d3  | 12,773,805  | 4,825,063    | 37.8% |
| R3 d3  | 15,798,712  | 5,993,916    | 37.9% |
| R1 d4  | 14,532,722  | 5,333,752    | 36.7% |
| R3 d4  | 11,200,086  | 4,544,160    | 40.6% |
| R1 d5  | 15,657,212  | 5,886,898    | 37.6% |
| R3 d5  | 18,145,506  | 6,714,337    | 37.0% |
| R2 d6  | 18,175,237  | 7,579,212    | 41.7% |
| R1 d7  | 15,231,345  | 5,503,538    | 36.1% |
| R2 d7  | 12,802,809  | 5,180,039    | 40.5% |
| R3 d7  | 9,215,150   | 209,266      | 2.3%  |
| R1 d8  | 14,418,080  | 5,437,061    | 37.7% |
| R2 d8  | 16,996,317  | 5,620,611    | 33.1% |
| R3 d8  | 15,719,249  | 6,584,459    | 41.9% |
| R2 d9  | 15,817,710  | 6,548,630    | 41.4% |
| R3 d9  | 110,269,949 | 43,012,501   | 39.0% |
| R3 d10 | 14,189,340  | 5,386,171    | 38.0% |

R: biological replicates; d: day of growth.

TABLE III  
List of differentially expressed genes (DEGs) with their respective false discovery rates (FDR) for total RNA fraction

| Supra gene | Representative ID | FDR                  |
|------------|-------------------|----------------------|
|            | FDR < 0.001       |                      |
|            | FDR < 0.01        |                      |
|            | FDR < 0.1         |                      |
| SG1026     | TcCLB.509215.40   | 1.01056444300841e-07 |
| SG2525     | TcCLB.506573.50   | 1.03018566600143e-05 |
| SG4321     | TcCLB.511529.160  | 1.03636558107401e-05 |
| SG4861     | TcCLB.510305.40   | 1.04269665988517e-07 |
| SG6307     | TcCLB.506229.64   | 1.06651613696932e-06 |
| SG7928     | TcCLB.506627.100  | 1.06651613696932e-06 |
| SG5927     | TcCLB.510575.210  | 1.07869870673197e-05 |
| SG3633     | TcCLB.503559.70   | 1.09522598565253e-06 |
| SG4884     | TcCLB.511283.124  | 1.0996102959851e-06  |
| SG6867     | TcCLB.504153.260  | 1.0996102959851e-06  |
| SG2527     | TcCLB.508661.70   | 1.1167321598022e-08  |
| SG1642     | TcCLB.505183.30   | 1.15015503587389e-11 |
| SG4904     | TcCLB.509045.20   | 1.17492916624975e-06 |
| SG0120     | TcCLB.506355.100  | 1.17859941290475e-05 |
| SG0251     | TcCLB.510581.9    | 1.17859941290475e-05 |
| SG2810     | TcCLB.508669.10   | 1.17859941290475e-05 |
| SG4455     | TcCLB.507737.20   | 1.17859941290475e-05 |
| SG6463     | TcCLB.509253.30   | 1.17859941290475e-05 |
| SG6280     | TcCLB.511635.40   | 1.19025062022882e-05 |

| Supra gene | Representative ID | FDR                  |
|------------|-------------------|----------------------|
| SG1918     | TcCLB.509795.30   | 1.22963384070983e-06 |
| SG3402     | TcCLB.506529.50   | 1.22963384070983e-06 |
| SG4814     | TcCLB.506821.80   | 1.22963384070983e-06 |
| SG7552     | TcCLB.505683.5    | 1.22963384070983e-06 |
| SG8466     | TcCLB.511391.120  | 1.23036648028499e-05 |
| SG0727     | TcCLB.508411.50   | 1.25752717640162e-06 |
| SG2870     | TcCLB.510581.20   | 1.2637725251021e-14  |
| SG4641     | TcCLB.507765.20   | 1.27131810515774e-05 |
| SG0350     | TcCLB.507059.60   | 1.2779774511191e-06  |
| SG6862     | TcCLB.482097.20   | 1.28102221102764e-05 |
| SG4292     | TcCLB.508737.70   | 1.28828806362647e-07 |
| SG2461     | TcCLB.511383.80   | 1.28871595741381e-07 |
| SG2281     | TcCLB.506581.30   | 1.30432524993638e-05 |
| SG4532     | TcCLB.511825.240  | 1.30958136727905e-07 |
| SG3266     | TcCLB.510665.30   | 1.31216967240945e-13 |
| SG0039     | TcCLB.507753.10   | 1.37496949142047e-05 |
| SG4110     | TcCLB.510099.30   | 1.37496949142047e-05 |
| SG2714     | TcCLB.508409.160  | 1.38595869835385e-06 |
| SG3838     | TcCLB.507609.40   | 1.39190414675295e-06 |
| SG7101     | TcCLB.510091.110  | 1.39290571524628e-10 |
| SG4497     | TcCLB.503925.90   | 1.39933069887826e-06 |
| SG4165     | TcCLB.510335.10   | 1.40189420442077e-06 |
| SG2306     | TcCLB.509901.100  | 1.43330849443164e-05 |
| SG0466     | TcCLB.509065.60   | 1.44031591648107e-05 |
| SG5265     | TcCLB.511389.130  | 1.44965294437024e-05 |
| SG1447     | TcCLB.509717.60   | 1.46114536440967e-05 |
| SG0346     | TcCLB.504223.20   | 1.47484637707156e-05 |
| SG6486     | TcCLB.511545.140  | 1.48344980920558e-05 |
| SG0635     | TcCLB.506775.30   | 1.49664282500327e-06 |
| SG5438     | TcCLB.507519.164  | 1.53628927251928e-05 |
| SG6155     | TcCLB.511903.20   | 1.57548980275785e-13 |
| SG7214     | TcCLB.507629.39   | 1.65045047629061e-09 |
| SG8015     | TcCLB.508461.240  | 1.65421698248415e-06 |
| SG4308     | TcCLB.507913.20   | 1.70398768186271e-09 |
| SG3440     | TcCLB.510445.50   | 1.70951793715063e-08 |
| SG3295     | TcCLB.509161.10   | 1.71207854352295e-05 |
| SG2752     | TcCLB.506399.80   | 1.74319278372277e-05 |
| SG4998     | TcCLB.510155.20   | 1.74319278372277e-05 |
| SG3769     | TcCLB.509713.30   | 1.74619452623287e-10 |
| SG5948     | TcCLB.503733.30   | 1.77735657468575e-05 |
| SG6911     | TcCLB.508307.170  | 1.78801682422977e-07 |
| SG0823     | TcCLB.506629.220  | 1.79641051831574e-06 |
| SG2286     | TcCLB.508193.60   | 1.81772376062515e-06 |
| SG5506     | TcCLB.508387.100  | 1.81772376062515e-06 |
| SG7386     | TcCLB.504147.260  | 1.81772376062515e-06 |
| SG6227     | TcCLB.511159.14   | 1.84651138811437e-05 |
| SG4732     | TcCLB.506413.70   | 1.86377173421176e-05 |
| SG1958     | TcCLB.508399.10   | 1.87937279322769e-06 |
| SG5213     | TcCLB.509715.40   | 1.88030270797382e-05 |
| SG1113     | TcCLB.503975.50   | 1.89300326210863e-05 |
| SG1740     | TcCLB.509693.80   | 1.92062839492702e-06 |
| SG2923     | TcCLB.508257.30   | 1.95052402997933e-05 |
| SG8258     | TcCLB.506247.50   | 2.01053795153087e-05 |

| Supra gene | Representative ID | FDR                  |
|------------|-------------------|----------------------|
| SG2347     | TcCLB.506195.290  | 2.0174737651711e-07  |
| SG6152     | TcCLB.510305.70   | 2.03736219486661e-08 |
| SG6583     | TcCLB.503925.80   | 2.11316315841838e-07 |
| SG1533     | TcCLB.509001.20   | 2.12424240452456e-06 |
| SG2855     | TcCLB.511277.60   | 2.16136115758532e-14 |
| SG5368     | TcCLB.508507.40   | 2.16497044245886e-08 |
| SG2025     | TcCLB.507515.90   | 2.17464056324085e-05 |
| SG2176     | TcCLB.509053.70   | 2.20473708743508e-07 |
| SG6096     | TcCLB.509643.70   | 2.20473708743508e-07 |
| SG2247     | TcCLB.503735.40   | 2.2588763169519e-05  |
| SG2297     | TcCLB.510225.40   | 2.2588763169519e-05  |
| SG4726     | TcCLB.510065.40   | 2.2588763169519e-05  |
| SG6972     | TcCLB.510431.230  | 2.26130669858727e-06 |
| SG2477     | TcCLB.511529.68   | 2.28034800694424e-07 |
| SG3123     | TcCLB.508981.20   | 2.28034800694424e-07 |
| SG4075     | TcCLB.508547.140  | 2.28252759091974e-05 |
| SG5274     | TcCLB.506775.180  | 2.28382385949458e-05 |
| SG3764     | TcCLB.508273.30   | 2.30173474030742e-05 |
| SG1074     | TcCLB.511899.40   | 2.34541008895979e-11 |
| SG1279     | TcCLB.504173.30   | 2.36970466836888e-06 |
| SG0145     | TcCLB.511911.90   | 2.41297253167476e-07 |
| SG8187     | TcCLB.510687.120  | 2.41297253167476e-07 |
| SG8124     | TcCLB.511003.160  | 2.50225005471539e-07 |
| SG3882     | TcCLB.506821.110  | 2.54843919429066e-06 |
| SG6408     | TcCLB.507081.130  | 2.54843919429066e-06 |
| SG5058     | TcCLB.503829.10   | 2.57477607334454e-06 |
| SG0042     | TcCLB.510787.10   | 2.63696971356176e-05 |
| SG3403     | TcCLB.508111.30   | 2.63696971356176e-05 |
| SG4050     | TcCLB.506193.60   | 2.63696971356176e-05 |
| SG4260     | TcCLB.505983.20   | 2.63696971356176e-05 |
| SG2142     | TcCLB.509429.280  | 2.63772514828082e-06 |
| SG0868     | TcCLB.504625.70   | 2.68085407931893e-08 |
| SG3526     | TcCLB.508909.20   | 2.68085407931893e-08 |
| SG7922     | TcCLB.510873.10   | 2.68085407931893e-08 |
| SG8729     | TcCLB.506247.40   | 2.68085407931893e-08 |
| SG3320     | TcCLB.511355.30   | 2.70196229937254e-07 |
| SG2393     | TcCLB.511281.40   | 2.70745401945982e-11 |
| SG5360     | TcCLB.509161.20   | 2.70931247547749e-06 |
| SG4095     | TcCLB.506479.120  | 2.71211015575622e-06 |
| SG6201     | TcCLB.508153.1140 | 2.72657337523708e-06 |
| SG4695     | TcCLB.511431.54   | 2.74076485662872e-05 |
| SG2229     | TcCLB.510039.64   | 2.74085480670086e-08 |
| SG7049     | TcCLB.511421.170  | 2.75661397564418e-07 |
| SG2986     | TcCLB.506195.300  | 2.85554381854888e-08 |
| SG4581     | TcCLB.509051.40   | 2.85554381854888e-08 |
| SG8143     | TcCLB.511807.125  | 2.85554381854888e-08 |
| SG1587     | TcCLB.510647.30   | 2.88151808420383e-08 |
| SG4182     | TcCLB.509499.10   | 2.88151808420383e-08 |
| SG0148     | TcCLB.511325.40   | 2.89218316812259e-11 |
| SG1829     | TcCLB.507057.40   | 2.95017660167688e-06 |
| SG2422     | TcCLB.508593.130  | 2.97151159352258e-06 |
| SG0514     | TcCLB.508015.10   | 2.98719404968148e-06 |
| SG3246     | TcCLB.511295.60   | 3.04726679823411e-07 |

| Supra gene | Representative ID | FDR                  |
|------------|-------------------|----------------------|
| SG2358     | TcCLB.421619.10   | 3.20181370251771e-05 |
| SG0476     | TcCLB.504191.10   | 3.20365980897923e-05 |
| SG4526     | TcCLB.504087.10   | 3.32426269798743e-05 |
| SG1784     | TcCLB.504021.100  | 3.34287836501881e-07 |
| SG8968     | TcCLB.509105.90   | 3.38095690968622e-06 |
| SG5740     | TcCLB.436521.9    | 3.5026999922761e-05  |
| SG0828     | TcCLB.508961.20   | 3.51087526596532e-06 |
| SG4159     | TcCLB.511277.100  | 3.57312100217816e-10 |
| SG7457     | TcCLB.511439.70   | 3.57312100217816e-10 |
| SG3604     | TcCLB.507023.50   | 3.67168011248812e-05 |
| SG4757     | TcCLB.511761.60   | 3.67168011248812e-05 |
| SG8050     | TcCLB.508017.30   | 3.67409656125025e-06 |
| SG8806     | TcCLB.508461.410  | 3.7750845237401e-06  |
| SG1789     | TcCLB.509551.70   | 3.78516352589202e-09 |
| SG5521     | TcCLB.511819.30   | 3.78517848166758e-05 |
| SG5855     | TcCLB.507927.80   | 3.801931620843e-05   |
| SG6238     | TcCLB.503809.75   | 3.80726326295479e-05 |
| SG0081     | TcCLB.504015.30   | 3.88736749442746e-11 |
| SG6761     | TcCLB.504213.100  | 3.96182842098215e-06 |
| SG5133     | TcCLB.508917.30   | 3.99551576122465e-05 |
| SG3070     | TcCLB.509937.170  | 4.00944464974503e-05 |
| SG6323     | TcCLB.509337.19   | 4.01442680182237e-05 |
| SG2699     | TcCLB.506355.130  | 4.13055258020184e-05 |
| SG7815     | TcCLB.508971.30   | 4.15816079138076e-06 |
| SG2453     | TcCLB.504001.20   | 4.22353529583195e-06 |
| SG7726     | TcCLB.510977.9    | 4.25371061987708e-07 |
| SG3684     | TcCLB.511151.54   | 4.36205176300856e-05 |
| SG7998     | TcCLB.511511.3    | 4.36205176300856e-05 |
| SG4574     | TcCLB.509599.60   | 4.366132367914e-05   |
| SG5578     | TcCLB.506025.40   | 4.36898241455572e-06 |
| SG4053     | TcCLB.504255.20   | 4.38045451320531e-08 |
| SG6371     | TcCLB.507787.140  | 4.38045451320531e-08 |
| SG7820     | TcCLB.504131.60   | 4.47701218704361e-05 |
| SG8239     | TcCLB.508479.274  | 4.52594431582249e-06 |
| SG0297     | TcCLB.511575.130  | 4.53590733380483e-05 |
| SG0766     | TcCLB.509049.30   | 4.56743338864575e-05 |
| SG0304     | TcCLB.506469.80   | 4.60101452522282e-09 |
| SG8302     | TcCLB.506335.130  | 4.64304207892595e-05 |
| SG5732     | TcCLB.509789.40   | 4.64769467094346e-06 |
| SG8318     | TcCLB.508799.240  | 4.66200925876879e-07 |
| SG4358     | TcCLB.511517.164  | 4.7380003984662e-05  |
| SG3677     | TcCLB.508817.10   | 4.79215771118602e-07 |
| SG6597     | TcCLB.509999.140  | 4.79709639809834e-05 |
| SG1862     | TcCLB.506443.70   | 4.82692750832172e-09 |
| SG5464     | TcCLB.508737.150  | 4.88933885839239e-10 |
| SG4548     | TcCLB.509237.50   | 4.90874097938717e-06 |
| SG2002     | TcCLB.503879.110  | 4.91140881054754e-06 |
| SG2991     | TcCLB.508269.40   | 4.91902708691792e-06 |
| SG8527     | TcCLB.511491.70   | 4.91902708691792e-06 |
| SG3329     | TcCLB.508307.180  | 4.92757510726064e-12 |
| SG6522     | TcCLB.509179.70   | 5.10665592012775e-05 |
| SG1575     | TcCLB.508999.260  | 5.28078281089821e-05 |
| SG8807     | TcCLB.508173.180  | 5.28078281089821e-05 |

| Supra gene | Representative ID | FDR                  |
|------------|-------------------|----------------------|
| SG0306     | TcCLB.506201.70   | 5.38640833317888e-06 |
| SG2362     | TcCLB.508859.80   | 5.48052811970786e-05 |
| SG8762     | TcCLB.511367.240  | 5.51598141670676e-06 |
| SG6762     | TcCLB.511189.70   | 5.66569533207648e-07 |
| SG5075     | TcCLB.504161.50   | 5.66960543319985e-07 |
| SG0084     | TcCLB.506551.10   | 5.74428444458141e-06 |
| SG3321     | TcCLB.509003.30   | 5.76275755920617e-08 |
| SG2267     | TcCLB.506835.40   | 5.76883669879035e-05 |
| SG2057     | TcCLB.510735.40   | 5.86059394107253e-05 |
| SG2389     | TcCLB.506211.250  | 5.92183788711253e-11 |
| SG1276     | TcCLB.509601.140  | 6.05744244364385e-07 |
| SG8723     | TcCLB.508667.40   | 6.12989415116471e-06 |
| SG3079     | TcCLB.508917.20   | 6.15190022559121e-05 |
| SG8505     | TcCLB.508257.180  | 6.15324375038038e-05 |
| SG2627     | TcCLB.511127.180  | 6.19292141731651e-05 |
| SG1540     | TcCLB.509053.30   | 6.24478543274979e-05 |
| SG2985     | TcCLB.510149.140  | 6.24478543274979e-05 |
| SG3061     | TcCLB.511807.64   | 6.24478543274979e-05 |
| SG8730     | TcCLB.509647.180  | 6.24478543274979e-05 |
| SG2019     | TcCLB.509109.160  | 6.30488123945194e-05 |
| SG0380     | TcCLB.511757.70   | 6.56388464887519e-06 |
| SG2054     | TcCLB.507801.130  | 6.58855422133355e-05 |
| SG6879     | TcCLB.506635.139  | 6.80669411762092e-06 |
| SG7394     | TcCLB.507099.30   | 6.95013469562337e-07 |
| SG7223     | TcCLB.441241.10   | 6.96020857724748e-07 |
| SG3072     | TcCLB.509033.80   | 6.97058426443546e-06 |
| SG3859     | TcCLB.510397.10   | 6.99218779670384e-05 |
| SG2513     | TcCLB.509059.50   | 7.01406021196298e-05 |
| SG2015     | TcCLB.507241.30   | 7.0231494620328e-06  |
| SG7626     | TcCLB.503419.50   | 7.10469389251848e-05 |
| SG8461     | TcCLB.508479.370  | 7.15996441667255e-07 |
| SG5443     | TcCLB.509151.90   | 7.16471627191549e-08 |
| SG5338     | TcCLB.503653.60   | 7.20074504721647e-07 |
| SG5829     | TcCLB.508153.164  | 7.24341517438601e-05 |
| SG4950     | TcCLB.508445.90   | 7.25072180381048e-05 |
| SG3001     | TcCLB.508257.70   | 7.28056026171613e-05 |
| SG2683     | TcCLB.508153.820  | 7.28163743649029e-05 |
| SG1620     | TcCLB.511277.539  | 7.37700204452579e-05 |
| SG0846     | TcCLB.508065.70   | 7.39573063363406e-11 |
| SG3947     | TcCLB.507031.29   | 7.44412712555917e-08 |
| SG6020     | TcCLB.508965.39   | 7.44412712555917e-08 |
| SG2257     | TcCLB.507049.100  | 7.54735350443382e-05 |
| SG2690     | TcCLB.507031.64   | 7.72668697986093e-05 |
| SG2327     | TcCLB.506625.120  | 7.76385072584385e-07 |
| SG2285     | TcCLB.507659.10   | 7.77876934300435e-06 |
| SG1548     | TcCLB.511865.40   | 7.8627739043801e-05  |
| SG5362     | TcCLB.509471.30   | 7.8627739043801e-05  |
| SG7876     | TcCLB.506629.40   | 7.88127075868704e-06 |
| SG5193     | TcCLB.511017.25   | 7.99510835636018e-06 |
| SG7857     | TcCLB.508173.100  | 8.00785289106158e-08 |
| SG5685     | TcCLB.511823.70   | 8.19797080222239e-05 |
| SG7583     | TcCLB.511421.210  | 8.35425400078286e-09 |
| SG7901     | TcCLB.511909.30   | 8.36948852094795e-05 |

| Supra gene | Representative ID | FDR                  |
|------------|-------------------|----------------------|
| SG5710     | TcCLB.509319.20   | 8.42222912419568e-08 |
| SG8006     | TcCLB.507053.170  | 8.52000228155904e-05 |
| SG3256     | TcCLB.507159.14   | 8.55999147088633e-07 |
| SG0245     | TcCLB.511657.20   | 8.64457214795336e-06 |
| SG2910     | TcCLB.507963.10   | 8.69306479164945e-05 |
| SG8224     | TcCLB.511367.210  | 8.70698823488967e-09 |
| SG5858     | TcCLB.504229.110  | 8.81077751693698e-05 |
| SG7933     | TcCLB.510187.290  | 8.83093195168873e-08 |
| SG3115     | TcCLB.511321.60   | 8.91807975149179e-07 |
| SG7589     | TcCLB.503975.40   | 8.93727212092524e-07 |
| SG5717     | TcCLB.505997.200  | 8.9622590220625e-08  |
| SG0638     | TcCLB.510719.20   | 9.07980436174219e-05 |
| SG8127     | TcCLB.508479.350  | 9.16070765986115e-07 |
| SG2028     | TcCLB.509505.40   | 9.18511022126231e-09 |
| SG1392     | TcCLB.506989.30   | 9.43832862029548e-05 |
| SG3990     | TcCLB.511827.100  | 9.43832862029548e-05 |
| SG5915     | TcCLB.503975.100  | 9.43832862029548e-05 |
| SG6383     | TcCLB.509733.70   | 9.43832862029548e-05 |
| SG7106     | TcCLB.509831.33   | 9.43832862029548e-05 |
| SG7272     | TcCLB.508307.150  | 9.48902148819923e-05 |
| SG2924     | TcCLB.510409.20   | 9.49078501921184e-05 |
| SG1304     | TcCLB.508707.130  | 9.53600027127768e-05 |
| SG6369     | TcCLB.504797.80   | 9.53600027127768e-05 |
| SG5641     | TcCLB.506543.10   | 9.54590175028695e-05 |
| SG8386     | TcCLB.510689.30   | 9.68879930771321e-12 |
| SG0814     | TcCLB.508909.330  | 9.75825465675192e-06 |
| SG8613     | TcCLB.510303.200  | 9.90469612444901e-06 |
| SG8724     | TcCLB.506679.20   | 9.92429315191171e-06 |
| SG3583     | TcCLB.508461.40   | 0.000113411071277938 |
| SG1528     | TcCLB.504105.160  | 0.000115226111299698 |
| SG4131     | TcCLB.507007.74   | 0.000115226111299698 |
| SG2793     | TcCLB.509229.60   | 0.000115796327763553 |
| SG4040     | TcCLB.508601.90   | 0.000117145898889255 |
| SG1031     | TcCLB.507811.30   | 0.000124944690850237 |
| SG0072     | TcCLB.505699.10   | 0.00012939106977822  |
| SG4441     | TcCLB.506263.40   | 0.000129756518487277 |
| SG5059     | TcCLB.505945.60   | 0.000133020305171217 |
| SG0560     | TcCLB.504255.30   | 0.000136155138955973 |
| SG1761     | TcCLB.506581.10   | 0.000136811916379176 |
| SG0441     | TcCLB.505999.10   | 0.000141564177607332 |
| SG2117     | TcCLB.509563.10   | 0.000141564177607332 |
| SG4320     | TcCLB.508699.40   | 0.000141564177607332 |
| SG4924     | TcCLB.508851.160  | 0.000141564177607332 |
| SG7706     | TcCLB.510187.250  | 0.000145700916926008 |
| SG1812     | TcCLB.509601.20   | 0.000151680854644768 |
| SG7098     | TcCLB.506925.10   | 0.000151735933486557 |
| SG6294     | TcCLB.503599.10   | 0.000156800163733703 |
| SG3964     | TcCLB.507711.50   | 0.000158129240484591 |
| SG7690     | TcCLB.511283.184  | 0.000158667185572096 |
| SG1942     | TcCLB.508153.260  | 0.000159110380004006 |
| SG3564     | TcCLB.509029.80   | 0.000159395619655299 |
| SG4556     | TcCLB.506777.20   | 0.000159621795370686 |
| SG3542     | TcCLB.510001.10   | 0.000162611922368521 |



| Supra gene | Representative ID | FDR                  |
|------------|-------------------|----------------------|
| SG8736     | TcCLB.511725.174  | 0.000165010379593963 |
| SG0310     | TcCLB.506153.10   | 0.000167843108126103 |
| SG6948     | TcCLB.509007.50   | 0.00017459852510774  |
| SG5199     | TcCLB.506991.10   | 0.000186235838317282 |
| SG5811     | TcCLB.507017.64   | 0.000186235838317282 |
| SG6595     | TcCLB.407335.9    | 0.000186535379775839 |
| SG4228     | TcCLB.510829.10   | 0.000190545392398022 |
| SG1315     | TcCLB.509207.120  | 0.000194790458083441 |
| SG7609     | TcCLB.508813.80   | 0.000200062071591417 |
| SG4962     | TcCLB.507951.170  | 0.000202160913188388 |
| SG5639     | TcCLB.506181.10   | 0.000202160913188388 |
| SG0661     | TcCLB.458241.10   | 0.000203713006337639 |
| SG7990     | TcCLB.507949.250  | 0.000203713006337639 |
| SG4501     | TcCLB.503945.40   | 0.000207525225700087 |
| SG3283     | TcCLB.508153.640  | 0.000209117044486174 |
| SG1926     | TcCLB.510667.60   | 0.000210173379678997 |
| SG1996     | TcCLB.508909.10   | 0.000210173379678997 |
| SG0749     | TcCLB.504051.40   | 0.000212251845498371 |
| SG3585     | TcCLB.508153.454  | 0.000212251845498371 |
| SG5209     | TcCLB.511289.70   | 0.000212251845498371 |
| SG5309     | TcCLB.509569.40   | 0.000212251845498371 |
| SG7988     | TcCLB.509647.50   | 0.000212251845498371 |
| SG4508     | TcCLB.503465.30   | 0.000214167871682298 |
| SG5645     | TcCLB.509429.120  | 0.000214167871682298 |
| SG5640     | TcCLB.510421.180  | 0.00021732084146479  |
| SG6491     | TcCLB.506241.80   | 0.000224676089154083 |
| SG5852     | TcCLB.507677.150  | 0.000229938540827474 |
| SG3861     | TcCLB.510423.50   | 0.000234439199553835 |
| SG3011     | TcCLB.504085.20   | 0.000235554894451083 |
| SG3930     | TcCLB.506301.20   | 0.000237063606113338 |
| SG2892     | TcCLB.508831.66   | 0.000248812092926471 |
| SG0377     | TcCLB.508621.10   | 0.000251327348946487 |
| SG2600     | TcCLB.503923.30   | 0.000251327348946487 |
| SG0281     | TcCLB.509639.10   | 0.000254687745300747 |
| SG4422     | TcCLB.507305.40   | 0.000254687745300747 |
| SG5170     | TcCLB.504069.90   | 0.000254687745300747 |
| SG5769     | TcCLB.511181.60   | 0.000261769715632981 |
| SG2474     | TcCLB.509561.70   | 0.000267199188024254 |
| SG7549     | TcCLB.510297.119  | 0.000267199188024254 |
| SG0848     | TcCLB.508461.80   | 0.000272736518907165 |
| SG2322     | TcCLB.506825.100  | 0.000272736518907165 |
| SG5294     | TcCLB.503891.40   | 0.000272736518907165 |
| SG6675     | TcCLB.510339.100  | 0.000280587931224313 |
| SG2930     | TcCLB.511481.70   | 0.000284631116731022 |
| SG5701     | TcCLB.508175.90   | 0.000287353510745692 |
| SG4271     | TcCLB.508577.140  | 0.000303928551768393 |
| SG7066     | TcCLB.510513.70   | 0.000305498566820537 |
| SG7516     | TcCLB.506625.70   | 0.000308113021332929 |
| SG0533     | TcCLB.506107.10   | 0.000319566669180563 |
| SG2819     | TcCLB.511857.50   | 0.000326546594620313 |
| SG5960     | TcCLB.505183.84   | 0.000326546594620313 |
| SG5419     | TcCLB.510221.20   | 0.00032776501617883  |
| SG7393     | TcCLB.504423.15   | 0.00032776501617883  |



| Supra gene | Representative ID | FDR                  |
|------------|-------------------|----------------------|
| SG1345     | TcCLB.506825.200  | 0.000334622452159167 |
| SG6057     | TcCLB.509695.50   | 0.000334622452159167 |
| SG3594     | TcCLB.504125.64   | 0.000339706351607527 |
| SG3189     | TcCLB.511499.59   | 0.000342909230402351 |
| SG5541     | TcCLB.506999.120  | 0.000342909230402351 |
| SG1589     | TcCLB.508999.250  | 0.000343166678284028 |
| SG3474     | TcCLB.511181.20   | 0.000353317489742391 |
| SG7638     | TcCLB.508257.220  | 0.000354076315231367 |
| SG1407     | TcCLB.510359.290  | 0.000356060970529331 |
| SG1850     | TcCLB.510155.10   | 0.000356060970529331 |
| SG5943     | TcCLB.511653.20   | 0.000356060970529331 |
| SG8482     | TcCLB.511655.20   | 0.000356060970529331 |
| SG2096     | TcCLB.510155.160  | 0.000361280103755018 |
| SG0593     | TcCLB.504053.10   | 0.000363224370856328 |
| SG6439     | TcCLB.508273.70   | 0.000364949072112695 |
| SG7919     | TcCLB.511367.138  | 0.000364949072112695 |
| SG4938     | TcCLB.503431.90   | 0.000368810431465046 |
| SG5586     | TcCLB.508153.920  | 0.000369727937586257 |
| SG2428     | TcCLB.506739.200  | 0.000383385184863792 |
| SG6185     | TcCLB.509859.50   | 0.000386504747268651 |
| SG6134     | TcCLB.509791.30   | 0.000397814759628858 |
| SG5007     | TcCLB.509109.114  | 0.000400514569019696 |
| SG6564     | TcCLB.511323.60   | 0.000403317693826751 |
| SG0049     | TcCLB.510275.255  | 0.000408086432704943 |
| SG4603     | TcCLB.511257.30   | 0.000408086432704943 |
| SG8660     | TcCLB.511727.140  | 0.000408086432704943 |
| SG6176     | TcCLB.511559.50   | 0.000411697256290668 |
| SG0040     | TcCLB.511643.110  | 0.000412854388924951 |
| SG4485     | TcCLB.510329.330  | 0.000415867217425011 |
| SG8878     | TcCLB.507019.60   | 0.000429937188471998 |
| SG0717     | TcCLB.506287.80   | 0.000430623763030432 |
| SG6387     | TcCLB.504427.50   | 0.000432312632418745 |
| SG7867     | TcCLB.508409.110  | 0.000432312632418745 |
| SG6906     | TcCLB.505073.10   | 0.000439799398327124 |
| SG2090     | TcCLB.510659.44   | 0.000442262874618575 |
| SG0887     | TcCLB.506851.10   | 0.000446700531560587 |
| SG1463     | TcCLB.510729.230  | 0.000446700531560587 |
| SG0980     | TcCLB.504069.56   | 0.000447496203570687 |
| SG3790     | TcCLB.506009.20   | 0.000447496203570687 |
| SG0268     | TcCLB.509239.10   | 0.000448523173872932 |
| SG2226     | TcCLB.504125.100  | 0.000465835894685788 |
| SG1082     | TcCLB.509835.10   | 0.000468414396520983 |
| SG4179     | TcCLB.509791.60   | 0.000468414396520983 |
| SG7153     | TcCLB.510859.17   | 0.000472281870436794 |
| SG0452     | TcCLB.503731.9    | 0.00047694374781764  |
| SG6489     | TcCLB.503917.7    | 0.000484191323208449 |
| SG1017     | TcCLB.504199.10   | 0.000486698085922064 |
| SG8971     | TcCLB.511249.44   | 0.000486698085922064 |
| SG3356     | TcCLB.510303.60   | 0.000492890911544352 |
| SG2451     | TcCLB.503409.10   | 0.000496454385526839 |
| SG1355     | TcCLB.503565.29   | 0.000515395036135195 |
| SG2828     | TcCLB.504199.20   | 0.000515395036135195 |
| SG2541     | TcCLB.509099.150  | 0.000526059235423362 |

| Supra gene | Representative ID | FDR                  |
|------------|-------------------|----------------------|
| SG6423     | TcCLB.509791.100  | 0.000526922316690177 |
| SG2387     | TcCLB.506175.50   | 0.000531007425237288 |
| SG1233     | TcCLB.510099.120  | 0.000551517009630718 |
| SG3966     | TcCLB.511031.40   | 0.000551517009630718 |
| SG6478     | TcCLB.509937.20   | 0.00057512783582601  |
| SG1257     | TcCLB.504949.30   | 0.000575623728637971 |
| SG3285     | TcCLB.509003.40   | 0.000581635450662447 |
| SG5962     | TcCLB.510323.60   | 0.000586949085540555 |
| SG4721     | TcCLB.510303.50   | 0.000588270489323341 |
| SG4488     | TcCLB.506477.20   | 0.000592130218180341 |
| SG3827     | TcCLB.507049.20   | 0.000599903435032779 |
| SG4920     | TcCLB.503681.20   | 0.000602398412455305 |
| SG7392     | TcCLB.504125.60   | 0.000630962636832953 |
| SG2881     | TcCLB.504129.40   | 0.000638924403208571 |
| SG6217     | TcCLB.503955.100  | 0.000650347229989038 |
| SG0708     | TcCLB.507009.30   | 0.000660198775336808 |
| SG3678     | TcCLB.510899.50   | 0.000660198775336808 |
| SG4590     | TcCLB.508231.200  | 0.000660198775336808 |
| SG3377     | TcCLB.511903.170  | 0.000662897491645456 |
| SG0020     | TcCLB.510583.80   | 0.000676746639247965 |
| SG5421     | TcCLB.511383.50   | 0.000687473921479146 |
| SG7402     | TcCLB.504057.130  | 0.00068893243291224  |
| SG5456     | TcCLB.508351.40   | 0.000690240152778556 |
| SG6230     | TcCLB.510729.140  | 0.000697413824557236 |
| SG7828     | TcCLB.506577.5    | 0.000708041767387593 |
| SG0095     | TcCLB.510783.20   | 0.000717101618010216 |
| SG0669     | TcCLB.504023.10   | 0.000717101618010216 |
| SG0829     | TcCLB.511821.170  | 0.000717101618010216 |
| SG4683     | TcCLB.510667.120  | 0.000717101618010216 |
| SG3146     | TcCLB.507275.40   | 0.000730786175191966 |
| SG4602     | TcCLB.511165.100  | 0.000758206896760016 |
| SG5232     | TcCLB.403875.10   | 0.000763438574236463 |
| SG5556     | TcCLB.510091.100  | 0.000765121490466007 |
| SG2321     | TcCLB.506825.80   | 0.000809646994732127 |
| SG3362     | TcCLB.506315.80   | 0.000809646994732127 |
| SG3249     | TcCLB.510349.20   | 0.000809747803007318 |
| SG0121     | TcCLB.511401.90   | 0.000814945420239379 |
| SG1008     | TcCLB.509237.90   | 0.000814945420239379 |
| SG5713     | TcCLB.506713.14   | 0.000819598155523427 |
| SG7274     | TcCLB.509895.20   | 0.00082192505982217  |
| SG8668     | TcCLB.507209.10   | 0.000828384770780291 |
| SG6892     | TcCLB.509705.10   | 0.00082984370278698  |
| SG6407     | TcCLB.511353.10   | 0.000830197325146995 |
| SG5647     | TcCLB.507061.34   | 0.000846866487584512 |
| SG3234     | TcCLB.506289.60   | 0.00084722497179096  |
| SG0677     | TcCLB.504125.80   | 0.000856076750958695 |
| SG4394     | TcCLB.511181.80   | 0.000856076750958695 |
| SG3779     | TcCLB.506709.10   | 0.000860184013475659 |
| SG4265     | TcCLB.511407.40   | 0.00086067827412805  |
| SG6362     | TcCLB.510311.100  | 0.000876072543996713 |
| SG5650     | TcCLB.503929.20   | 0.000896525307261925 |
| SG1609     | TcCLB.509595.30   | 0.000938078013415483 |
| SG5418     | TcCLB.510339.54   | 0.000939273312104305 |

| Supra gene | Representative ID | FDR                  |
|------------|-------------------|----------------------|
| SG6440     | TcCLB.507089.30   | 0.000941514567993354 |
| SG0884     | TcCLB.485683.10   | 0.000948463805251628 |
| SG7102     | TcCLB.503865.60   | 0.000954477569366741 |
| SG2772     | TcCLB.508637.120  | 0.000957222346309509 |
| SG3449     | TcCLB.510861.70   | 0.000957222346309509 |
| SG7003     | TcCLB.508727.24   | 0.000957222346309509 |
| SG3397     | TcCLB.510357.80   | 0.000961024202008758 |
| SG7824     | TcCLB.506993.160  | 0.000961024202008758 |
| SG3943     | TcCLB.510155.94   | 0.000965262076344066 |
| SG1122     | TcCLB.504019.3    | 0.000969860932850609 |
| SG6749     | TcCLB.504117.50   | 0.000982167013737877 |
| SG1896     | TcCLB.503773.24   | 0.000984442637043313 |
| SG4689     | TcCLB.506975.20   | 0.000984442637043313 |
| SG0230     | TcCLB.506789.334  | 0.000987341395632467 |
| SG6989     | TcCLB.506885.90   | 0.000987341395632467 |
| SG2499     | TcCLB.511593.20   | 0.0010025986937168   |
| SG2099     | TcCLB.510155.115  | 0.00100681167957184  |
| SG2700     | TcCLB.509167.20   | 0.00103663407708214  |
| SG3315     | TcCLB.506791.10   | 0.00105429750575586  |
| SG1607     | TcCLB.511647.10   | 0.00107913273943214  |
| SG0776     | TcCLB.510003.20   | 0.00108532315749467  |
| SG4813     | TcCLB.506727.110  | 0.00109101433127715  |
| SG0327     | TcCLB.511385.110  | 0.00113696667380214  |
| SG4322     | TcCLB.506931.70   | 0.00113696667380214  |
| SG5512     | TcCLB.508741.370  | 0.00114261209822271  |
| SG2395     | TcCLB.510887.30   | 0.00115691167635128  |
| SG0115     | TcCLB.510795.10   | 0.00119091582700703  |
| SG3844     | TcCLB.506999.180  | 0.00119610937771672  |
| SG5721     | TcCLB.507031.90   | 0.00119610937771672  |
| SG8531     | TcCLB.511725.230  | 0.00119610937771672  |
| SG0879     | TcCLB.503531.40   | 0.00119895588356781  |
| SG6374     | TcCLB.510877.140  | 0.00119895588356781  |
| SG1634     | TcCLB.506727.140  | 0.00120977474273555  |
| SG0101     | TcCLB.506499.105  | 0.00123888203502991  |
| SG4013     | TcCLB.506175.10   | 0.00123888203502991  |
| SG4169     | TcCLB.507491.119  | 0.00123888203502991  |
| SG2917     | TcCLB.508593.30   | 0.00126737501065541  |
| SG4150     | TcCLB.510311.30   | 0.00126823148112674  |
| SG5969     | TcCLB.511353.50   | 0.00126823148112674  |
| SG6686     | TcCLB.508637.160  | 0.00126823148112674  |
| SG7444     | TcCLB.508647.174  | 0.00126823148112674  |
| SG1998     | TcCLB.508707.50   | 0.0012888104596629   |
| SG4628     | TcCLB.507017.70   | 0.00130692276016585  |
| SG1780     | TcCLB.506401.280  | 0.00130794066786695  |
| SG2039     | TcCLB.511025.70   | 0.00130794066786695  |
| SG2302     | TcCLB.509207.90   | 0.00130794066786695  |
| SG4385     | TcCLB.508891.30   | 0.00130794066786695  |
| SG8682     | TcCLB.504109.140  | 0.00131839604523259  |
| SG2661     | TcCLB.509695.100  | 0.00135161828517396  |
| SG3311     | TcCLB.509749.30   | 0.00135699608907242  |
| SG1085     | TcCLB.507669.110  | 0.00137370058790978  |
| SG5304     | TcCLB.510357.10   | 0.00137779092409794  |
| SG0527     | TcCLB.506357.130  | 0.00139871350503308  |

| Supra gene | Representative ID | FDR                 |
|------------|-------------------|---------------------|
| SG0620     | TcCLB.509999.120  | 0.00139871350503308 |
| SG1413     | TcCLB.503515.14   | 0.00140985922997773 |
| SG8306     | TcCLB.508707.200  | 0.00141205851292071 |
| SG1362     | TcCLB.509573.10   | 0.00141776104788085 |
| SG8248     | TcCLB.506985.50   | 0.00141776104788085 |
| SG2351     | TcCLB.508593.100  | 0.00142374895271999 |
| SG2701     | TcCLB.506443.40   | 0.00142374895271999 |
| SG2911     | TcCLB.506475.113  | 0.00142374895271999 |
| SG5555     | TcCLB.511277.140  | 0.00142374895271999 |
| SG1705     | TcCLB.510689.80   | 0.00143832031612459 |
| SG1823     | TcCLB.510285.20   | 0.00144568799864631 |
| SG1366     | TcCLB.508799.70   | 0.00147652953999608 |
| SG2416     | TcCLB.508269.60   | 0.00147652953999608 |
| SG3998     | TcCLB.509509.50   | 0.00147652953999608 |
| SG2367     | TcCLB.503595.10   | 0.00148046914449595 |
| SG5797     | TcCLB.503943.14   | 0.00148046914449595 |
| SG2097     | TcCLB.503939.50   | 0.00148110392430497 |
| SG3853     | TcCLB.508641.184  | 0.00148110392430497 |
| SG6334     | TcCLB.503781.30   | 0.00148110392430497 |
| SG6840     | TcCLB.506285.30   | 0.00148110392430497 |
| SG2565     | TcCLB.509945.24   | 0.00150031331264031 |
| SG1781     | TcCLB.511167.20   | 0.00150362497858572 |
| SG1347     | TcCLB.504113.30   | 0.0015161768560001  |
| SG1038     | TcCLB.508645.40   | 0.0015169985964491  |
| SG2995     | TcCLB.511287.130  | 0.00152879235157445 |
| SG8940     | TcCLB.506559.434  | 0.0015493487706853  |
| SG7606     | TcCLB.427247.10   | 0.00156771124781898 |
| SG2329     | TcCLB.509055.50   | 0.00157118754172063 |
| SG2789     | TcCLB.506691.60   | 0.00157118754172063 |
| SG1124     | TcCLB.508823.50   | 0.00159398945156369 |
| SG4679     | TcCLB.511167.110  | 0.00159398945156369 |
| SG7753     | TcCLB.506977.80   | 0.00159398945156369 |
| SG8398     | TcCLB.504071.110  | 0.00159398945156369 |
| SG2977     | TcCLB.506221.120  | 0.00160076312564989 |
| SG7720     | TcCLB.510733.50   | 0.00161378175455046 |
| SG0702     | TcCLB.507659.20   | 0.00161493442935634 |
| SG3019     | TcCLB.506241.160  | 0.00162528336217694 |
| SG6079     | TcCLB.504741.250  | 0.00162693343102312 |
| SG8081     | TcCLB.508153.184  | 0.00162973837506034 |
| SG4507     | TcCLB.509799.20   | 0.0016408504956081  |
| SG8401     | TcCLB.511725.134  | 0.00166887872533114 |
| SG8052     | TcCLB.506679.80   | 0.00167475599249688 |
| SG3978     | TcCLB.511287.90   | 0.00172760351156448 |
| SG6637     | TcCLB.506559.524  | 0.0017378574664376  |
| SG5286     | TcCLB.506593.40   | 0.00175066835918659 |
| SG1524     | TcCLB.508909.300  | 0.00175967706379931 |
| SG4638     | TcCLB.510659.270  | 0.00180785487419403 |
| SG1541     | TcCLB.506579.10   | 0.0018096864432437  |
| SG7978     | TcCLB.509857.40   | 0.00181091488089181 |
| SG8669     | TcCLB.511367.170  | 0.00181091488089181 |
| SG5604     | TcCLB.511459.50   | 0.00186093604677333 |
| SG5299     | TcCLB.509065.140  | 0.00186137285380764 |
| SG3109     | TcCLB.506295.130  | 0.00189787031471231 |

| Supra gene | Representative ID | FDR                 |
|------------|-------------------|---------------------|
| SG1416     | TcCLB.509213.110  | 0.0019278017941305  |
| SG0330     | TcCLB.510763.30   | 0.0019449961494174  |
| SG2630     | TcCLB.511517.130  | 0.00195570352471526 |
| SG5238     | TcCLB.507943.60   | 0.00195570352471526 |
| SG5742     | TcCLB.510007.20   | 0.00196082715610032 |
| SG5112     | TcCLB.506363.110  | 0.00196112944384983 |
| SG7730     | TcCLB.511391.110  | 0.00201545858251748 |
| SG3689     | TcCLB.509879.40   | 0.00201683796908789 |
| SG6827     | TcCLB.506925.510  | 0.0020200716867345  |
| SG1993     | TcCLB.503465.40   | 0.00203404437528953 |
| SG1994     | TcCLB.504153.30   | 0.00203404437528953 |
| SG4384     | TcCLB.510333.10   | 0.00203404437528953 |
| SG2313     | TcCLB.504003.30   | 0.00206952155450176 |
| SG3084     | TcCLB.511529.50   | 0.00206952155450176 |
| SG6406     | TcCLB.508153.520  | 0.00208007363759711 |
| SG5968     | TcCLB.508999.40   | 0.00209201682326367 |
| SG5619     | TcCLB.508965.70   | 0.00214473118161577 |
| SG8020     | TcCLB.510129.20   | 0.00223474361787102 |
| SG2520     | TcCLB.508973.60   | 0.00224420430462155 |
| SG1377     | TcCLB.508405.50   | 0.00226400578985617 |
| SG2239     | TcCLB.511805.20   | 0.0022701280211525  |
| SG2965     | TcCLB.509429.130  | 0.0022701280211525  |
| SG6219     | TcCLB.511465.20   | 0.0022701280211525  |
| SG6576     | TcCLB.510859.10   | 0.0022701280211525  |
| SG3644     | TcCLB.507831.60   | 0.00227785078238929 |
| SG8488     | TcCLB.508815.120  | 0.00229603821329914 |
| SG4767     | TcCLB.503625.10   | 0.00230568269982701 |
| SG8485     | TcCLB.511907.270  | 0.0023165991971216  |
| SG4378     | TcCLB.507951.140  | 0.00231864836439036 |
| SG7791     | TcCLB.509105.130  | 0.00231905518252907 |
| SG6791     | TcCLB.506945.240  | 0.00232642524469532 |
| SG8889     | TcCLB.508879.160  | 0.00234771019622625 |
| SG6496     | TcCLB.506297.350  | 0.00235250982332827 |
| SG3159     | TcCLB.511761.50   | 0.00236610781482683 |
| SG7707     | TcCLB.510187.280  | 0.00236944902547051 |
| SG8670     | TcCLB.503603.10   | 0.00236944902547051 |
| SG0392     | TcCLB.509237.120  | 0.00238558414070001 |
| SG6214     | TcCLB.506855.350  | 0.00238558414070001 |
| SG2908     | TcCLB.510395.20   | 0.00239007958043842 |
| SG0037     | TcCLB.506435.370  | 0.00241882226900596 |
| SG7365     | TcCLB.503479.70   | 0.00243110950326525 |
| SG1330     | TcCLB.511583.10   | 0.00247768134035095 |
| SG3887     | TcCLB.510667.80   | 0.0024780707113297  |
| SG2738     | TcCLB.509023.50   | 0.0025238480500148  |
| SG3393     | TcCLB.511635.30   | 0.00253701398563633 |
| SG4362     | TcCLB.510031.70   | 0.00260233491339933 |
| SG4860     | TcCLB.505071.140  | 0.00260233491339933 |
| SG5673     | TcCLB.506123.30   | 0.00260330688481149 |
| SG7572     | TcCLB.506925.540  | 0.00262076156712293 |
| SG0044     | TcCLB.511593.40   | 0.00262143668878857 |
| SG1560     | TcCLB.509643.100  | 0.00264816561374491 |
| SG8347     | TcCLB.510889.100  | 0.00266950667409964 |
| SG1251     | TcCLB.511857.10   | 0.00267718817968389 |

| Supra gene | Representative ID | FDR                 |
|------------|-------------------|---------------------|
| SG2093     | TcCLB.504431.30   | 0.00267732905765635 |
| SG6601     | TcCLB.511633.79   | 0.00267732905765635 |
| SG6392     | TcCLB.511033.20   | 0.00270754944410044 |
| SG6500     | TcCLB.509997.60   | 0.00272175904858488 |
| SG6090     | TcCLB.509229.10   | 0.00275319895262949 |
| SG0269     | TcCLB.508671.20   | 0.00275641135165448 |
| SG3651     | TcCLB.509717.100  | 0.00276965402688302 |
| SG4317     | TcCLB.510507.50   | 0.00276965402688302 |
| SG0311     | TcCLB.509599.130  | 0.00277087109685899 |
| SG7853     | TcCLB.510901.170  | 0.00277735817945062 |
| SG6404     | TcCLB.511903.90   | 0.00278746852471374 |
| SG8704     | TcCLB.511259.50   | 0.00278746852471374 |
| SG2796     | TcCLB.509631.160  | 0.00281393515240322 |
| SG1919     | TcCLB.507143.60   | 0.00283306131118543 |
| SG5505     | TcCLB.510425.28   | 0.00284035147144793 |
| SG5235     | TcCLB.508799.150  | 0.00284090418329824 |
| SG8016     | TcCLB.507073.30   | 0.00284090418329824 |
| SG1605     | TcCLB.509937.220  | 0.00284322368558198 |
| SG2596     | TcCLB.506985.40   | 0.00284837014729528 |
| SG2833     | TcCLB.511653.40   | 0.00288323071818906 |
| SG6075     | TcCLB.510663.40   | 0.00289004341163929 |
| SG0257     | TcCLB.509201.15   | 0.00291717757122531 |
| SG7302     | TcCLB.504147.240  | 0.00291936355546668 |
| SG0882     | TcCLB.509029.40   | 0.00295729491291614 |
| SG3438     | TcCLB.503923.10   | 0.00295729491291614 |
| SG6785     | TcCLB.506529.400  | 0.0030298004269024  |
| SG5838     | TcCLB.508501.250  | 0.00306052009943191 |
| SG4172     | TcCLB.506327.80   | 0.00308519121340538 |
| SG8722     | TcCLB.511367.159  | 0.00309312309691449 |
| SG4751     | TcCLB.508777.40   | 0.00316023176520497 |
| SG4971     | TcCLB.509229.130  | 0.00318356752625099 |
| SG2489     | TcCLB.509099.130  | 0.00319829482952214 |
| SG6484     | TcCLB.506871.180  | 0.00320446287413002 |
| SG2237     | TcCLB.506855.130  | 0.00321704888746975 |
| SG3258     | TcCLB.511127.340  | 0.00323998625030725 |
| SG4408     | TcCLB.506905.30   | 0.00328564526104176 |
| SG7173     | TcCLB.503955.80   | 0.00329865039844109 |
| SG2038     | TcCLB.506425.80   | 0.00334441729864586 |
| SG3179     | TcCLB.506491.10   | 0.0033718269377602  |
| SG0747     | TcCLB.511303.40   | 0.00338866771802726 |
| SG1874     | TcCLB.510149.120  | 0.00338866771802726 |
| SG8089     | TcCLB.506445.100  | 0.00341155135396439 |
| SG1835     | TcCLB.507583.20   | 0.00342279216748633 |
| SG1165     | TcCLB.506825.70   | 0.00342566126628011 |
| SG8029     | TcCLB.511491.40   | 0.00353428486187771 |
| SG3538     | TcCLB.503687.30   | 0.00362478270791825 |
| SG3457     | TcCLB.511167.60   | 0.00367954241785975 |
| SG5196     | TcCLB.510667.10   | 0.00368640357268502 |
| SG7492     | TcCLB.508837.160  | 0.00369120832805509 |
| SG7262     | TcCLB.504153.140  | 0.00369707434337389 |
| SG4064     | TcCLB.510691.70   | 0.00369848162755132 |
| SG8942     | TcCLB.511511.5    | 0.0037471877549154  |
| SG3409     | TcCLB.508919.94   | 0.003838787757389   |

| Supra gene | Representative ID | FDR                 |
|------------|-------------------|---------------------|
| SG5693     | TcCLB.511745.60   | 0.0038387877757389  |
| SG6154     | TcCLB.508641.180  | 0.00389321498840107 |
| SG2049     | TcCLB.508741.380  | 0.00400672992754516 |
| SG4018     | TcCLB.508613.30   | 0.00403560157458711 |
| SG2363     | TcCLB.504137.50   | 0.00406162092118613 |
| SG4754     | TcCLB.503459.10   | 0.00406162092118613 |
| SG4109     | TcCLB.508717.36   | 0.00409624294035188 |
| SG3755     | TcCLB.511517.30   | 0.00412606811574631 |
| SG3485     | TcCLB.503987.39   | 0.00414374030273034 |
| SG3846     | TcCLB.506629.20   | 0.00417835647999747 |
| SG7777     | TcCLB.508173.70   | 0.00417835647999747 |
| SG0052     | TcCLB.506289.140  | 0.00419859665924364 |
| SG6694     | TcCLB.508983.20   | 0.00423564102374228 |
| SG5557     | TcCLB.510421.270  | 0.00423919244155913 |
| SG8743     | TcCLB.511317.50   | 0.00423919244155913 |
| SG6207     | TcCLB.510719.120  | 0.00426043354145699 |
| SG4130     | TcCLB.506871.70   | 0.00430861477683285 |
| SG4437     | TcCLB.503697.70   | 0.00430861477683285 |
| SG2732     | TcCLB.506755.50   | 0.00437825839850949 |
| SG6025     | TcCLB.511257.10   | 0.00437825839850949 |
| SG4090     | TcCLB.511285.40   | 0.00439878343755249 |
| SG8867     | TcCLB.511277.180  | 0.00439878343755249 |
| SG0439     | TcCLB.508821.50   | 0.00440506088165993 |
| SG7770     | TcCLB.511367.60   | 0.00444584700414622 |
| SG0400     | TcCLB.510571.30   | 0.00445918364761605 |
| SG1057     | TcCLB.510007.50   | 0.00445918364761605 |
| SG6469     | TcCLB.510359.170  | 0.00445918364761605 |
| SG0712     | TcCLB.506559.129  | 0.00446174044230484 |
| SG2231     | TcCLB.511229.50   | 0.00446174044230484 |
| SG4439     | TcCLB.506627.110  | 0.00454238194939383 |
| SG5096     | TcCLB.508823.20   | 0.00459449303743446 |
| SG1477     | TcCLB.511307.20   | 0.00465129863643342 |
| SG2702     | TcCLB.510993.10   | 0.00465129863643342 |
| SG8233     | TcCLB.511003.30   | 0.00465129863643342 |
| SG3250     | TcCLB.511815.40   | 0.00470884447353068 |
| SG3018     | TcCLB.506195.150  | 0.00473383536264033 |
| SG2356     | TcCLB.509683.20   | 0.00478028332723772 |
| SG4926     | TcCLB.503617.31   | 0.00478028332723772 |
| SG5052     | TcCLB.506435.110  | 0.00478028332723772 |
| SG3464     | TcCLB.506963.70   | 0.00479426271292232 |
| SG4190     | TcCLB.509835.30   | 0.00479426271292232 |
| SG8863     | TcCLB.506321.280  | 0.00479426271292232 |
| SG5985     | TcCLB.507023.180  | 0.00480845197138674 |
| SG6067     | TcCLB.508817.140  | 0.00482798167927889 |
| SG3080     | TcCLB.509859.40   | 0.00483417637890296 |
| SG2654     | TcCLB.506583.30   | 0.00484897631590435 |
| SG7747     | TcCLB.508827.110  | 0.00484897631590435 |
| SG8638     | TcCLB.511367.199  | 0.00493822966467415 |
| SG3591     | TcCLB.511903.134  | 0.00494645797248594 |
| SG2200     | TcCLB.510615.10   | 0.00495079437545899 |
| SG5520     | TcCLB.507491.70   | 0.00504827888260521 |
| SG3467     | TcCLB.503617.10   | 0.00508075692062969 |
| SG6803     | TcCLB.510879.180  | 0.00508760218941109 |



| Supra gene | Representative ID | FDR                 |
|------------|-------------------|---------------------|
| SG1526     | TcCLB.506885.300  | 0.00510428130952481 |
| SG7159     | TcCLB.510743.10   | 0.00514456015616567 |
| SG2973     | TcCLB.511517.160  | 0.00515688636279232 |
| SG1898     | TcCLB.507817.80   | 0.00520078932421305 |
| SG4903     | TcCLB.511253.20   | 0.00527337972990147 |
| SG1239     | TcCLB.508637.150  | 0.00530620392773876 |
| SG6931     | TcCLB.510761.30   | 0.00530620392773876 |
| SG8510     | TcCLB.511283.240  | 0.00530620392773876 |
| SG1452     | TcCLB.509599.100  | 0.00534163878136394 |
| SG3814     | TcCLB.508153.680  | 0.00534163878136394 |
| SG2976     | TcCLB.508689.20   | 0.00540245050165069 |
| SG1104     | TcCLB.507715.20   | 0.00550799163070301 |
| SG0640     | TcCLB.507951.299  | 0.00552083995374304 |
| SG8767     | TcCLB.510187.380  | 0.00556821205209992 |
| SG1317     | TcCLB.511217.120  | 0.0055869326830733  |
| SG3711     | TcCLB.511021.90   | 0.0055869326830733  |
| SG7599     | TcCLB.511211.70   | 0.00562386670968057 |
| SG6937     | TcCLB.445635.10   | 0.00564567302893335 |
| SG4885     | TcCLB.511361.10   | 0.00564857133635784 |
| SG1380     | TcCLB.507021.50   | 0.00565973807855172 |
| SG5374     | TcCLB.506735.40   | 0.00565973807855172 |
| SG5391     | TcCLB.504013.55   | 0.00565973807855172 |
| SG0419     | TcCLB.508153.1050 | 0.00571001485436844 |
| SG8573     | TcCLB.507053.20   | 0.00573244948701495 |
| SG5216     | TcCLB.503679.30   | 0.00573510045770737 |
| SG3028     | TcCLB.511821.110  | 0.00574437756042132 |
| SG2492     | TcCLB.506797.110  | 0.00574981511741126 |
| SG4789     | TcCLB.511289.90   | 0.005816159890649   |
| SG3739     | TcCLB.506975.63   | 0.00603981372237957 |
| SG3518     | TcCLB.511511.150  | 0.0060735013049542  |
| SG2465     | TcCLB.503465.10   | 0.00610904932297616 |
| SG2826     | TcCLB.509717.30   | 0.00610904932297616 |
| SG5750     | TcCLB.510735.90   | 0.00610904932297616 |
| SG8213     | TcCLB.508547.190  | 0.00614972442501329 |
| SG7329     | TcCLB.504147.110  | 0.00616402582021793 |
| SG2169     | TcCLB.507049.60   | 0.00621605374817415 |
| SG6986     | TcCLB.507641.50   | 0.00621738103724918 |
| SG4951     | TcCLB.503579.40   | 0.00629010384546653 |
| SG7011     | TcCLB.506795.70   | 0.00631029839497067 |
| SG6907     | TcCLB.510431.140  | 0.00634096754376919 |
| SG0584     | TcCLB.509921.51   | 0.00634703533013692 |
| SG2926     | TcCLB.511649.100  | 0.00634703533013692 |
| SG2992     | TcCLB.510421.140  | 0.00639384173476817 |
| SG4991     | TcCLB.507515.120  | 0.00648420136778516 |
| SG4038     | TcCLB.507853.10   | 0.00649772120890841 |
| SG2509     | TcCLB.509755.50   | 0.00655171702529622 |
| SG3654     | TcCLB.510301.30   | 0.00663168178543718 |
| SG8145     | TcCLB.509003.70   | 0.00663168178543718 |
| SG6188     | TcCLB.509179.130  | 0.00669956845421798 |
| SG1861     | TcCLB.509937.160  | 0.0067091699536991  |
| SG1671     | TcCLB.509943.30   | 0.00672762645191971 |
| SG8498     | TcCLB.511807.190  | 0.00672762645191971 |
| SG2974     | TcCLB.509937.50   | 0.00674337171717076 |

| Supra gene | Representative ID | FDR                 |
|------------|-------------------|---------------------|
| SG3831     | TcCLB.506553.10   | 0.00674337171717076 |
| SG2181     | TcCLB.424123.40   | 0.00678404480241282 |
| SG1410     | TcCLB.510101.480  | 0.00681820323602793 |
| SG4857     | TcCLB.507047.140  | 0.00682349081866941 |
| SG6093     | TcCLB.508661.10   | 0.00682349081866941 |
| SG2085     | TcCLB.505071.90   | 0.00683380904184168 |
| SG6804     | TcCLB.506885.60   | 0.00689397399446478 |
| SG7108     | TcCLB.506945.200  | 0.00689397399446478 |
| SG7752     | TcCLB.508173.264  | 0.00689601260787331 |
| SG8268     | TcCLB.511809.10   | 0.00692376443370777 |
| SG8425     | TcCLB.507019.30   | 0.00692376443370777 |
| SG4656     | TcCLB.503891.120  | 0.00694207842120474 |
| SG4670     | TcCLB.511389.110  | 0.00699008349719516 |
| SG2980     | TcCLB.508817.110  | 0.00699388183018912 |
| SG4209     | TcCLB.508741.170  | 0.00699388183018912 |
| SG0321     | TcCLB.508499.39   | 0.00707727515072815 |
| SG5730     | TcCLB.511249.110  | 0.00712478155119456 |
| SG8149     | TcCLB.508823.60   | 0.00718613034230559 |
| SG3185     | TcCLB.509777.60   | 0.00719138338947696 |
| SG5174     | TcCLB.511729.60   | 0.00723798237022746 |
| SG4106     | TcCLB.503747.40   | 0.00725027054435666 |
| SG3765     | TcCLB.508707.160  | 0.00727190902437799 |
| SG6507     | TcCLB.506275.20   | 0.00736672951400456 |
| SG4146     | TcCLB.508153.270  | 0.00736985451846769 |
| SG4199     | TcCLB.510655.130  | 0.00736985451846769 |
| SG4735     | TcCLB.508263.30   | 0.00736985451846769 |
| SG7028     | TcCLB.509703.10   | 0.00736985451846769 |
| SG7545     | TcCLB.506925.14   | 0.00736985451846769 |
| SG1612     | TcCLB.508153.1110 | 0.00743429607082211 |
| SG2783     | TcCLB.507519.150  | 0.00747225349582734 |
| SG8304     | TcCLB.504071.40   | 0.00748605691723676 |
| SG6939     | TcCLB.506925.310  | 0.00768914923268969 |
| SG0622     | TcCLB.506871.20   | 0.00770003790536571 |
| SG8421     | TcCLB.509527.120  | 0.00770312338000088 |
| SG7340     | TcCLB.506625.190  | 0.00771465231615007 |
| SG1020     | TcCLB.508625.160  | 0.00790723812388328 |
| SG3607     | TcCLB.510443.30   | 0.00790723812388328 |
| SG7008     | TcCLB.511215.50   | 0.00820722844902689 |
| SG8589     | TcCLB.510821.60   | 0.00820722844902689 |
| SG4157     | TcCLB.504073.20   | 0.00827929151799913 |
| SG6336     | TcCLB.509799.60   | 0.00836026897313866 |
| SG5789     | TcCLB.467287.10   | 0.00840347745458332 |
| SG6019     | TcCLB.511001.70   | 0.00842020306773793 |
| SG0763     | TcCLB.507715.10   | 0.00842687407998195 |
| SG8880     | TcCLB.511725.250  | 0.00842687407998195 |
| SG1386     | TcCLB.506959.70   | 0.00842727848178976 |
| SG1690     | TcCLB.509023.140  | 0.00847654147515437 |
| SG0150     | TcCLB.506279.140  | 0.00862194632010625 |
| SG2537     | TcCLB.509607.70   | 0.00866055813142103 |
| SG3589     | TcCLB.510143.120  | 0.00867530258268852 |
| SG8155     | TcCLB.510187.480  | 0.00867530258268852 |
| SG8075     | TcCLB.508461.350  | 0.00876767241447679 |
| SG4236     | TcCLB.509267.40   | 0.00877318450155812 |

| Supra gene | Representative ID | FDR                 |
|------------|-------------------|---------------------|
| SG4713     | TcCLB.507711.90   | 0.00880813175356978 |
| SG1501     | TcCLB.509429.160  | 0.00886147651180398 |
| SG2305     | TcCLB.509207.80   | 0.00891619682462909 |
| SG2543     | TcCLB.510661.244  | 0.00894505314575407 |
| SG4049     | TcCLB.511909.70   | 0.00894505314575407 |
| SG4334     | TcCLB.507857.10   | 0.00894505314575407 |
| SG7068     | TcCLB.509267.20   | 0.00894505314575407 |
| SG1566     | TcCLB.508443.30   | 0.00896476130070729 |
| SG2463     | TcCLB.508857.140  | 0.00906529480629163 |
| SG6618     | TcCLB.511649.150  | 0.00906529480629163 |
| SG0920     | TcCLB.509063.30   | 0.00909763535620134 |
| SG7914     | TcCLB.508547.50   | 0.00909763535620134 |
| SG2193     | TcCLB.503449.14   | 0.00920586946093193 |
| SG8628     | TcCLB.510799.60   | 0.00922602174678888 |
| SG5291     | TcCLB.508943.20   | 0.00924086478380251 |
| SG7136     | TcCLB.507105.50   | 0.00930387825562981 |
| SG0222     | TcCLB.510065.10   | 0.00934116888527908 |
| SG6658     | TcCLB.507019.83   | 0.00937087935873574 |
| SG4653     | TcCLB.506789.270  | 0.00944877308135807 |
| SG1327     | TcCLB.508851.200  | 0.00949241040177579 |
| SG3782     | TcCLB.511289.50   | 0.00955217663940607 |
| SG1426     | TcCLB.507093.40   | 0.00958894592122689 |
| SG7866     | TcCLB.506175.120  | 0.00976625682828751 |
| SG3923     | TcCLB.510517.60   | 0.00985509598720211 |
| SG0038     | TcCLB.511835.10   | 0.00991188758704778 |
| SG2902     | TcCLB.508153.1100 | 0.00991188758704778 |
| SG5617     | TcCLB.503995.50   | 0.00996788780475544 |
| SG8275     | TcCLB.510901.230  | 0.00996788780475544 |
| SG3802     | TcCLB.507705.10   | 0.0100537638572497  |
| SG2396     | TcCLB.509799.140  | 0.0100944386398465  |
| SG7616     | TcCLB.506933.80   | 0.0101432641539439  |
| SG7016     | TcCLB.506375.80   | 0.0102639571787231  |
| SG8644     | TcCLB.507583.40   | 0.0103774627383922  |
| SG2404     | TcCLB.508989.30   | 0.0103779408779423  |
| SG7483     | TcCLB.507091.160  | 0.0103995461621624  |
| SG1991     | TcCLB.508445.30   | 0.0104187161460053  |
| SG7837     | TcCLB.511283.200  | 0.0104187161460053  |
| SG3142     | TcCLB.510611.10   | 0.01043019367739    |
| SG2201     | TcCLB.504175.40   | 0.01043566410038    |
| SG3698     | TcCLB.510889.231  | 0.01043566410038    |
| SG1269     | TcCLB.509693.70   | 0.0104718473701957  |
| SG6347     | TcCLB.508677.134  | 0.0105289021513     |
| SG1940     | TcCLB.508153.240  | 0.0105381674012578  |
| SG7827     | TcCLB.506679.70   | 0.0105381674012578  |
| SG8948     | TcCLB.506445.110  | 0.0105381674012578  |
| SG4219     | TcCLB.506855.20   | 0.0105595528659168  |
| SG8557     | TcCLB.511389.40   | 0.0105595528659168  |
| SG5972     | TcCLB.510121.40   | 0.010612291422841   |
| SG5241     | TcCLB.510065.30   | 0.0106521973572098  |
| SG4409     | TcCLB.510001.20   | 0.0106700606464166  |
| SG3928     | TcCLB.511725.40   | 0.0106884166185018  |
| SG3002     | TcCLB.505171.60   | 0.0107538150351749  |
| SG5106     | TcCLB.506989.10   | 0.0109083768989892  |

| Supra gene | Representative ID | FDR                |
|------------|-------------------|--------------------|
| SG7751     | TcCLB.508153.140  | 0.0109874756031175 |
| SG3681     | TcCLB.503703.30   | 0.0109992375101375 |
| SG8232     | TcCLB.508879.40   | 0.0110186877418106 |
| SG6479     | TcCLB.508909.140  | 0.0110829795927671 |
| SG3895     | TcCLB.503823.120  | 0.0111138967660774 |
| SG5406     | TcCLB.506297.10   | 0.0111563936551314 |
| SG6498     | TcCLB.506925.390  | 0.0111755826143644 |
| SG3239     | TcCLB.506729.90   | 0.0111893551786396 |
| SG1635     | TcCLB.507003.60   | 0.0111938150192259 |
| SG1371     | TcCLB.510149.40   | 0.0112646766197253 |
| SG1323     | TcCLB.509025.20   | 0.0113443041186157 |
| SG8580     | TcCLB.508799.10   | 0.0113512226082253 |
| SG3281     | TcCLB.507775.40   | 0.0114314637989198 |
| SG2348     | TcCLB.504105.180  | 0.0114405538823094 |
| SG1354     | TcCLB.509747.50   | 0.0115292476927784 |
| SG5341     | TcCLB.508351.20   | 0.0115361546241239 |
| SG3005     | TcCLB.508693.90   | 0.0115635805966661 |
| SG1033     | TcCLB.504051.20   | 0.0116400751242107 |
| SG1280     | TcCLB.509571.40   | 0.0116400751242107 |
| SG1214     | TcCLB.503551.20   | 0.0117174229373201 |
| SG7131     | TcCLB.503467.20   | 0.0118000805628252 |
| SG3297     | TcCLB.506819.30   | 0.0118177178731577 |
| SG4323     | TcCLB.508707.320  | 0.0118201888296632 |
| SG8637     | TcCLB.511277.400  | 0.0118201888296632 |
| SG4739     | TcCLB.510965.10   | 0.0121494988171864 |
| SG8147     | TcCLB.508461.110  | 0.0121494988171864 |
| SG6869     | TcCLB.510599.70   | 0.01219923593953   |
| SG7031     | TcCLB.508647.90   | 0.0122487733775885 |
| SG1456     | TcCLB.510647.60   | 0.0122509683356977 |
| SG3546     | TcCLB.510421.210  | 0.0122934655522127 |
| SG2766     | TcCLB.507889.10   | 0.0124419978371332 |
| SG3774     | TcCLB.509153.60   | 0.0125700782773959 |
| SG6579     | TcCLB.508211.50   | 0.0125824497148831 |
| SG1766     | TcCLB.510105.20   | 0.0126155838614398 |
| SG5744     | TcCLB.511545.170  | 0.0127132943764059 |
| SG8696     | TcCLB.511511.6    | 0.0127132943764059 |
| SG8042     | TcCLB.508479.340  | 0.0127715007449016 |
| SG1273     | TcCLB.508027.70   | 0.0129270647133462 |
| SG0207     | TcCLB.511607.60   | 0.012934569001313  |
| SG8966     | TcCLB.510187.100  | 0.012934569001313  |
| SG2452     | TcCLB.511291.50   | 0.0129554555348106 |
| SG5436     | TcCLB.508357.90   | 0.0129554555348106 |
| SG1856     | TcCLB.503819.20   | 0.0129924670424914 |
| SG3743     | TcCLB.511817.10   | 0.0129924670424914 |
| SG4373     | TcCLB.511871.90   | 0.0129924670424914 |
| SG5003     | TcCLB.503527.40   | 0.0129924670424914 |
| SG5891     | TcCLB.511479.39   | 0.0130875420493326 |
| SG6970     | TcCLB.504153.240  | 0.0130996718238535 |
| SG7317     | TcCLB.506925.440  | 0.0131046187003517 |
| SG7886     | TcCLB.511725.170  | 0.0131046187003517 |
| SG3479     | TcCLB.507897.30   | 0.0131445247365801 |
| SG4955     | TcCLB.503411.10   | 0.0133264649710885 |
| SG8284     | TcCLB.508461.370  | 0.0134449912108173 |

| Supra gene | Representative ID | FDR                |
|------------|-------------------|--------------------|
| SG5153     | TcCLB.511237.110  | 0.0134790471740958 |
| SG7075     | TcCLB.506777.24   | 0.0134932360587262 |
| SG6547     | TcCLB.511285.70   | 0.0135432540635592 |
| SG5363     | TcCLB.508707.227  | 0.0135756572528024 |
| SG2673     | TcCLB.503829.70   | 0.0136163090021424 |
| SG1495     | TcCLB.509065.36   | 0.0136330021937897 |
| SG8365     | TcCLB.509525.20   | 0.0136383195150938 |
| SG3582     | TcCLB.503975.20   | 0.0137409063798318 |
| SG4478     | TcCLB.511621.170  | 0.0137663257577539 |
| SG1179     | TcCLB.508365.100  | 0.0138983710501869 |
| SG4041     | TcCLB.510667.50   | 0.0139777324513699 |
| SG2017     | TcCLB.511661.40   | 0.0140094633449627 |
| SG6054     | TcCLB.511001.80   | 0.0140094633449627 |
| SG0768     | TcCLB.506247.370  | 0.0140337585491362 |
| SG5261     | TcCLB.509795.40   | 0.0141565616736738 |
| SG6150     | TcCLB.509671.189  | 0.0141772247480775 |
| SG5509     | TcCLB.510579.50   | 0.0143471285465274 |
| SG5545     | TcCLB.511903.40   | 0.0143630186776    |
| SG4973     | TcCLB.510533.80   | 0.0143965376354581 |
| SG7966     | TcCLB.508693.190  | 0.0145004866230932 |
| SG1275     | TcCLB.511245.120  | 0.0145386171458223 |
| SG5766     | TcCLB.506869.10   | 0.0146963992127522 |
| SG1254     | TcCLB.506733.80   | 0.0149938778665969 |
| SG3420     | TcCLB.511425.40   | 0.015103726480572  |
| SG6103     | TcCLB.511719.30   | 0.0151045038117956 |
| SG5467     | TcCLB.511837.10   | 0.0151619895383731 |
| SG2564     | TcCLB.509171.47   | 0.0151827020986033 |
| SG3396     | TcCLB.509599.120  | 0.0152150591459619 |
| SG8440     | TcCLB.506821.200  | 0.0152718618856278 |
| SG2954     | TcCLB.511301.44   | 0.0155841042713501 |
| SG0369     | TcCLB.503781.90   | 0.015641220420164  |
| SG6243     | TcCLB.507793.20   | 0.0157367053092096 |
| SG6264     | TcCLB.511717.20   | 0.0158434065657907 |
| SG2933     | TcCLB.508699.80   | 0.015914471095467  |
| SG6384     | TcCLB.509023.150  | 0.0159874744043494 |
| SG7979     | TcCLB.510901.30   | 0.0160074281273622 |
| SG1369     | TcCLB.509875.260  | 0.0160579488715677 |
| SG1458     | TcCLB.511233.90   | 0.0161240450160249 |
| SG6961     | TcCLB.511867.130  | 0.0161288470461797 |
| SG3536     | TcCLB.504157.70   | 0.0161444506840337 |
| SG2943     | TcCLB.508641.100  | 0.0161445666531068 |
| SG3126     | TcCLB.503917.14   | 0.0161580130728016 |
| SG5667     | TcCLB.509607.60   | 0.0161580130728016 |
| SG7420     | TcCLB.511365.80   | 0.0162711972122875 |
| SG4361     | TcCLB.509331.74   | 0.0162720798767558 |
| SG8822     | TcCLB.511727.210  | 0.0162720798767558 |
| SG8957     | TcCLB.511367.220  | 0.0162720798767558 |
| SG7749     | TcCLB.510329.90   | 0.0162958404399839 |
| SG6276     | TcCLB.503885.100  | 0.0163599603583715 |
| SG0735     | TcCLB.511467.16   | 0.0163747121657976 |
| SG3834     | TcCLB.511039.6    | 0.0164075606155364 |
| SG8614     | TcCLB.511003.60   | 0.0164287407487974 |
| SG5260     | TcCLB.511555.20   | 0.016470248188358  |

| Supra gene | Representative ID | FDR                |
|------------|-------------------|--------------------|
| SG6538     | TcCLB.506717.10   | 0.0165705303259132 |
| SG3292     | TcCLB.511239.110  | 0.0165925909853025 |
| SG3926     | TcCLB.427789.20   | 0.0166420510398754 |
| SG7708     | TcCLB.510187.160  | 0.0166420510398754 |
| SG0196     | TcCLB.506243.135  | 0.0166683962891292 |
| SG0797     | TcCLB.507083.10   | 0.0166683962891292 |
| SG0942     | TcCLB.506743.4    | 0.0167024118397182 |
| SG5191     | TcCLB.508713.30   | 0.0167024118397182 |
| SG7601     | TcCLB.507093.250  | 0.0167024118397182 |
| SG6621     | TcCLB.508905.10   | 0.0167643290776433 |
| SG1046     | TcCLB.511583.20   | 0.0168902380816196 |
| SG4428     | TcCLB.507087.80   | 0.0169564340544408 |
| SG5874     | TcCLB.511903.190  | 0.0170467581449776 |
| SG0109     | TcCLB.508789.120  | 0.0171640175991482 |
| SG6453     | TcCLB.405737.14   | 0.0172092356817284 |
| SG3950     | TcCLB.503795.10   | 0.0174024502681666 |
| SG0303     | TcCLB.510899.59   | 0.0175431385856854 |
| SG1819     | TcCLB.509319.90   | 0.0175431385856854 |
| SG5050     | TcCLB.511517.150  | 0.0176079312441052 |
| SG3491     | TcCLB.511445.100  | 0.0176286559967406 |
| SG2568     | TcCLB.506855.180  | 0.017664205231287  |
| SG5252     | TcCLB.506411.30   | 0.017664205231287  |
| SG5869     | TcCLB.507011.180  | 0.0177263295501741 |
| SG7792     | TcCLB.510901.220  | 0.0178839572353435 |
| SG8594     | TcCLB.510945.70   | 0.0179554132312786 |
| SG5876     | TcCLB.508387.150  | 0.0179955374078364 |
| SG0190     | TcCLB.506885.210  | 0.0179992270471385 |
| SG7652     | TcCLB.510901.180  | 0.0179992270471385 |
| SG5237     | TcCLB.509719.40   | 0.0180557249498397 |
| SG7976     | TcCLB.508459.18   | 0.01807050357331   |
| SG8262     | TcCLB.507769.30   | 0.0180840406217993 |
| SG0496     | TcCLB.509007.99   | 0.0181632726024193 |
| SG0701     | TcCLB.509935.20   | 0.0185652139574262 |
| SG6308     | TcCLB.509911.90   | 0.0187043164681364 |
| SG3738     | TcCLB.507787.70   | 0.0189336236619408 |
| SG7722     | TcCLB.506679.60   | 0.0189336236619408 |
| SG3855     | TcCLB.507601.20   | 0.0189413536575742 |
| SG7957     | TcCLB.508533.40   | 0.0189413536575742 |
| SG2077     | TcCLB.511649.94   | 0.0190067569693766 |
| SG4873     | TcCLB.507941.70   | 0.0190067569693766 |
| SG7845     | TcCLB.510661.80   | 0.0190067569693766 |
| SG5149     | TcCLB.508503.70   | 0.0190826679662529 |
| SG6769     | TcCLB.511211.60   | 0.0190906637844012 |
| SG3385     | TcCLB.504797.90   | 0.0194410579408273 |
| SG2950     | TcCLB.510609.100  | 0.0195357684985414 |
| SG3647     | TcCLB.506475.90   | 0.0195357684985414 |
| SG6377     | TcCLB.509599.180  | 0.0196248306782312 |
| SG1809     | TcCLB.504167.14   | 0.0196279699658826 |
| SG0454     | TcCLB.509109.130  | 0.019798214108985  |
| SG0631     | TcCLB.506947.110  | 0.019798214108985  |
| SG2409     | TcCLB.506303.160  | 0.019798214108985  |
| SG6681     | TcCLB.509867.70   | 0.019798214108985  |
| SG8480     | TcCLB.510329.210  | 0.019798214108985  |

| Supra gene | Representative ID | FDR                |
|------------|-------------------|--------------------|
| SG0111     | TcCLB.508229.60   | 0.0198495711023353 |
| SG0967     | TcCLB.509059.20   | 0.0200535895991371 |
| SG8497     | TcCLB.510329.110  | 0.0200628969550756 |
| SG4487     | TcCLB.510339.74   | 0.0207601096248647 |
| SG6890     | TcCLB.506529.595  | 0.0208042474379214 |
| SG2875     | TcCLB.510595.40   | 0.0208760526557211 |
| SG7944     | TcCLB.504155.20   | 0.021034855474229  |
| SG3795     | TcCLB.504839.60   | 0.0213696072175835 |
| SG6616     | TcCLB.506229.60   | 0.021411078689043  |
| SG8162     | TcCLB.506619.30   | 0.0215969116302946 |
| SG0290     | TcCLB.509943.20   | 0.0216235123092439 |
| SG2134     | TcCLB.503693.20   | 0.0216235123092439 |
| SG1557     | TcCLB.506679.270  | 0.0216555529729678 |
| SG5668     | TcCLB.510101.59   | 0.0216555529729678 |
| SG6490     | TcCLB.511151.100  | 0.0216555529729678 |
| SG4524     | TcCLB.506503.4    | 0.0217573909806658 |
| SG3661     | TcCLB.511657.40   | 0.0217760075516606 |
| SG3929     | TcCLB.510667.100  | 0.0217760075516606 |
| SG1201     | TcCLB.511825.210  | 0.0218099248739463 |
| SG4917     | TcCLB.507775.10   | 0.0218099248739463 |
| SG5186     | TcCLB.509895.50   | 0.0218099248739463 |
| SG5979     | TcCLB.506435.150  | 0.0218675514840454 |
| SG4376     | TcCLB.509999.20   | 0.0219845804228958 |
| SG8545     | TcCLB.510187.400  | 0.0219845804228958 |
| SG6315     | TcCLB.507715.30   | 0.0219866512314691 |
| SG8829     | TcCLB.507007.76   | 0.0220721159878026 |
| SG1411     | TcCLB.509611.20   | 0.0224331082596754 |
| SG8431     | TcCLB.506337.220  | 0.0224617964828214 |
| SG4481     | TcCLB.507001.110  | 0.0224908179967848 |
| SG6417     | TcCLB.506321.340  | 0.0224941432095165 |
| SG2762     | TcCLB.507787.20   | 0.0225439568346615 |
| SG4392     | TcCLB.506573.30   | 0.0226773504229188 |
| SG5816     | TcCLB.503897.70   | 0.0226773504229188 |
| SG5958     | TcCLB.505183.124  | 0.0226773504229188 |
| SG6945     | TcCLB.511421.60   | 0.0226773504229188 |
| SG2198     | TcCLB.503943.20   | 0.0226833417476424 |
| SG5648     | TcCLB.507143.80   | 0.0226833417476424 |
| SG0001     | TcCLB.503739.20   | 0.0227364589272275 |
| SG7597     | TcCLB.506625.230  | 0.0227595170967593 |
| SG1054     | TcCLB.507011.120  | 0.0227618559392545 |
| SG6842     | TcCLB.504147.70   | 0.0228421591226067 |
| SG3017     | TcCLB.506195.160  | 0.0230355499382782 |
| SG1748     | TcCLB.511907.30   | 0.0230514706242017 |
| SG6399     | TcCLB.507765.120  | 0.0236989641799094 |
| SG2023     | TcCLB.507895.140  | 0.0237744848060026 |
| SG3879     | TcCLB.511759.30   | 0.0238328796638802 |
| SG5961     | TcCLB.509461.60   | 0.0238328796638802 |
| SG6651     | TcCLB.510669.40   | 0.0238328796638802 |
| SG5559     | TcCLB.505193.20   | 0.0238804475042116 |
| SG7920     | TcCLB.511755.28   | 0.0238804475042116 |
| SG3586     | TcCLB.508153.590  | 0.0240517414059443 |
| SG4961     | TcCLB.507775.50   | 0.0241314759547494 |
| SG3355     | TcCLB.510303.70   | 0.0242103687400558 |



| Supra gene | Representative ID | FDR                |
|------------|-------------------|--------------------|
| SG7479     | TcCLB.508357.100  | 0.0244972730311467 |
| SG5625     | TcCLB.506681.50   | 0.0247026024131917 |
| SG8950     | TcCLB.508711.10   | 0.0248034731173192 |
| SG4545     | TcCLB.506605.174  | 0.0250566093517216 |
| SG8173     | TcCLB.506337.180  | 0.0250566093517216 |
| SG6209     | TcCLB.511383.30   | 0.025076673534679  |
| SG1695     | TcCLB.506201.150  | 0.0251221148414412 |
| SG0237     | TcCLB.504839.28   | 0.0254337421361061 |
| SG6149     | TcCLB.511153.120  | 0.0256011496607576 |
| SG5263     | TcCLB.511459.60   | 0.0256812284190132 |
| SG6665     | TcCLB.510949.10   | 0.0256812284190132 |
| SG7808     | TcCLB.511491.140  | 0.0256812284190132 |
| SG2604     | TcCLB.508577.160  | 0.0257236464588096 |
| SG5882     | TcCLB.511285.30   | 0.0257236464588096 |
| SG6539     | TcCLB.509623.10   | 0.0257236464588096 |
| SG6434     | TcCLB.508865.30   | 0.0259745506958255 |
| SG0973     | TcCLB.510353.10   | 0.0261220887365485 |
| SG4815     | TcCLB.510903.60   | 0.0262788116683942 |
| SG4848     | TcCLB.503791.20   | 0.0263125485069913 |
| SG2256     | TcCLB.506575.70   | 0.0263796510059561 |
| SG3166     | TcCLB.504153.340  | 0.0266889611211165 |
| SG0772     | TcCLB.506583.60   | 0.0269171660118465 |
| SG4087     | TcCLB.503981.80   | 0.0269171660118465 |
| SG3503     | TcCLB.506479.80   | 0.0270506980606363 |
| SG4429     | TcCLB.504207.10   | 0.0270506980606363 |
| SG7588     | TcCLB.508727.50   | 0.0270506980606363 |
| SG2490     | TcCLB.507467.119  | 0.0272537876654948 |
| SG5248     | TcCLB.508851.180  | 0.0273606803335067 |
| SG0862     | TcCLB.508153.60   | 0.027364920434326  |
| SG7958     | TcCLB.503461.20   | 0.027364920434326  |
| SG0686     | TcCLB.508881.70   | 0.0274191748623479 |
| SG7460     | TcCLB.511313.30   | 0.0274780858036908 |
| SG4371     | TcCLB.503733.10   | 0.0274941303167605 |
| SG5013     | TcCLB.508777.130  | 0.0274941303167605 |
| SG5787     | TcCLB.508175.370  | 0.0279112791150051 |
| SG0180     | TcCLB.510693.270  | 0.0281427173725544 |
| SG3918     | TcCLB.507073.20   | 0.0281427173725544 |
| SG8378     | TcCLB.506247.220  | 0.0281427173725544 |
| SG7767     | TcCLB.507019.20   | 0.0282920943562924 |
| SG7743     | TcCLB.506855.190  | 0.0283560875642668 |
| SG1450     | TcCLB.511649.160  | 0.0284088822343352 |
| SG1146     | TcCLB.510565.20   | 0.028409460126132  |
| SG1514     | TcCLB.511717.80   | 0.0284430044754466 |
| SG2294     | TcCLB.506851.30   | 0.0284887468641966 |
| SG4722     | TcCLB.510659.240  | 0.0284957534815041 |
| SG5632     | TcCLB.506401.100  | 0.0284957534815041 |
| SG2227     | TcCLB.509999.110  | 0.0287462790988036 |
| SG2602     | TcCLB.511761.40   | 0.0287633323415761 |
| SG3314     | TcCLB.510027.20   | 0.0287633323415761 |
| SG2217     | TcCLB.511751.30   | 0.0289066511663494 |
| SG4421     | TcCLB.511825.260  | 0.0292329685734744 |
| SG1611     | TcCLB.510657.90   | 0.0293160052461423 |
| SG8960     | TcCLB.509545.40   | 0.0293160052461423 |

| Supra gene | Representative ID | FDR                |
|------------|-------------------|--------------------|
| SG1621     | TcCLB.511821.40   | 0.0293743415674341 |
| SG1259     | TcCLB.508075.50   | 0.0295825726351954 |
| SG3331     | TcCLB.504021.60   | 0.0295825726351954 |
| SG5305     | TcCLB.508857.130  | 0.0295877170545233 |
| SG4331     | TcCLB.504157.100  | 0.029644477034502  |
| SG2984     | TcCLB.506691.40   | 0.0296570585421956 |
| SG5061     | TcCLB.510725.40   | 0.0296721963492361 |
| SG4216     | TcCLB.510967.20   | 0.02989616205276   |
| SG3621     | TcCLB.511629.30   | 0.0300684770048006 |
| SG3722     | TcCLB.510431.250  | 0.0302486127502509 |
| SG6364     | TcCLB.507031.170  | 0.0303943390913184 |
| SG8601     | TcCLB.506559.410  | 0.0303943390913184 |
| SG2390     | TcCLB.506337.20   | 0.0304934762826962 |
| SG6077     | TcCLB.510729.160  | 0.0305487828217862 |
| SG4162     | TcCLB.505193.84   | 0.0306377290262278 |
| SG2508     | TcCLB.509525.100  | 0.0306868844483788 |
| SG7831     | TcCLB.506247.355  | 0.0306868844483788 |
| SG4414     | TcCLB.511277.20   | 0.0307666854841237 |
| SG1007     | TcCLB.508901.10   | 0.0310531478605797 |
| SG0213     | TcCLB.506961.25   | 0.0310788324147586 |
| SG3481     | TcCLB.507521.130  | 0.0311046479391891 |
| SG7936     | TcCLB.509997.20   | 0.0311356214617397 |
| SG4841     | TcCLB.506257.60   | 0.0311415888655803 |
| SG6151     | TcCLB.511621.60   | 0.0311415888655803 |
| SG5257     | TcCLB.511825.220  | 0.0311417958486902 |
| SG2323     | TcCLB.506681.24   | 0.0311683545499905 |
| SG0753     | TcCLB.507623.60   | 0.0314591776195082 |
| SG0986     | TcCLB.506585.40   | 0.0315783595847988 |
| SG5926     | TcCLB.504001.10   | 0.0316287261402436 |
| SG1804     | TcCLB.510967.10   | 0.0317281840963935 |
| SG4762     | TcCLB.506725.20   | 0.0317281840963935 |
| SG1974     | TcCLB.508347.20   | 0.0319540506661013 |
| SG3683     | TcCLB.511621.190  | 0.0320406909132676 |
| SG6458     | TcCLB.503939.10   | 0.0321245360900039 |
| SG2784     | TcCLB.510665.40   | 0.0322000536107321 |
| SG3414     | TcCLB.506195.120  | 0.0322000536107321 |
| SG3576     | TcCLB.504427.20   | 0.0322000536107321 |
| SG0755     | TcCLB.510003.30   | 0.0322052607333781 |
| SG4241     | TcCLB.506989.50   | 0.0323632436213926 |
| SG6744     | TcCLB.510879.130  | 0.0323632436213926 |
| SG6432     | TcCLB.508865.20   | 0.0324639555702719 |
| SG7279     | TcCLB.503747.30   | 0.0325356045674126 |
| SG3641     | TcCLB.510329.320  | 0.0325815049315679 |
| SG5745     | TcCLB.510897.70   | 0.0328950679380515 |
| SG7283     | TcCLB.506289.80   | 0.0329152264528271 |
| SG5115     | TcCLB.504045.120  | 0.0330294713572251 |
| SG0632     | TcCLB.503571.19   | 0.0330810836677541 |
| SG5748     | TcCLB.508543.60   | 0.0330810836677541 |
| SG8339     | TcCLB.510363.310  | 0.0335827304982813 |
| SG3756     | TcCLB.506295.80   | 0.0336560886320746 |
| SG4809     | TcCLB.508045.30   | 0.0338411592315464 |
| SG4657     | TcCLB.510259.24   | 0.0342104250926194 |
| SG2960     | TcCLB.503939.84   | 0.0342119999141072 |

| Supra gene | Representative ID | FDR                |
|------------|-------------------|--------------------|
| SG3340     | TcCLB.511153.144  | 0.0342119999141072 |
| SG8542     | TcCLB.508479.174  | 0.034287276933987  |
| SG0568     | TcCLB.509353.20   | 0.0344005770374146 |
| SG4691     | TcCLB.508269.20   | 0.0344005770374146 |
| SG5859     | TcCLB.511737.10   | 0.0344005770374146 |
| SG3380     | TcCLB.503823.30   | 0.0346594449907417 |
| SG1021     | TcCLB.509261.30   | 0.0346806909800175 |
| SG1037     | TcCLB.508981.39   | 0.0346806909800175 |
| SG1172     | TcCLB.511545.100  | 0.0348071216226455 |
| SG5015     | TcCLB.510691.10   | 0.0348071216226455 |
| SG7265     | TcCLB.509247.50   | 0.0348071216226455 |
| SG8382     | TcCLB.509995.20   | 0.0349288934112128 |
| SG6128     | TcCLB.508503.60   | 0.0350695156584551 |
| SG7133     | TcCLB.511873.10   | 0.035093912041084  |
| SG5553     | TcCLB.511603.500  | 0.035112645644461  |
| SG8097     | TcCLB.508533.50   | 0.035112645644461  |
| SG8206     | TcCLB.511295.20   | 0.035112645644461  |
| SG2042     | TcCLB.507765.110  | 0.0352657757796705 |
| SG2372     | TcCLB.507035.120  | 0.0352657757796705 |
| SG6386     | TcCLB.506753.110  | 0.0352657757796705 |
| SG8821     | TcCLB.511277.359  | 0.0352657757796705 |
| SG0861     | TcCLB.505071.110  | 0.0354851050111099 |
| SG1149     | TcCLB.505193.10   | 0.0356336824564014 |
| SG6086     | TcCLB.482319.19   | 0.0356953502088877 |
| SG0896     | TcCLB.503835.10   | 0.0358889718424593 |
| SG0200     | TcCLB.510187.420  | 0.0359277589039433 |
| SG0393     | TcCLB.504075.10   | 0.0359526212406063 |
| SG2072     | TcCLB.503945.20   | 0.036293122731363  |
| SG2860     | TcCLB.508231.70   | 0.0363036310291158 |
| SG4827     | TcCLB.508153.810  | 0.0363379183842643 |
| SG2587     | TcCLB.511261.10   | 0.036367008706249  |
| SG2755     | TcCLB.508153.730  | 0.0365280066751186 |
| SG6488     | TcCLB.510729.240  | 0.0365280066751186 |
| SG5489     | TcCLB.508909.214  | 0.0365662804930409 |
| SG8203     | TcCLB.509647.90   | 0.0365662804930409 |
| SG6470     | TcCLB.509775.9    | 0.0366130199603214 |
| SG2493     | TcCLB.511907.60   | 0.0366507398360815 |
| SG3268     | TcCLB.460127.20   | 0.0366938511093348 |
| SG8759     | TcCLB.507063.10   | 0.0369716434142889 |
| SG5540     | TcCLB.506883.50   | 0.0370012447845173 |
| SG3860     | TcCLB.508893.10   | 0.0372166283719633 |
| SG3334     | TcCLB.507023.110  | 0.037257181914037  |
| SG3835     | TcCLB.508265.70   | 0.0373200493593071 |
| SG3991     | TcCLB.511807.40   | 0.0373647468567356 |
| SG5495     | TcCLB.508799.50   | 0.0373868387630145 |
| SG6411     | TcCLB.506177.30   | 0.0373868387630145 |
| SG3064     | TcCLB.509791.90   | 0.0374865419982864 |
| SG7307     | TcCLB.504149.100  | 0.0375285061444641 |
| SG2655     | TcCLB.510257.60   | 0.03755366493049   |
| SG0872     | TcCLB.506855.160  | 0.0376445816396623 |
| SG1274     | TcCLB.504213.90   | 0.0376983563037049 |
| SG6118     | TcCLB.511545.90   | 0.0378768112978287 |
| SG1509     | TcCLB.511361.70   | 0.0379559717792212 |

| Supra gene | Representative ID | FDR                |
|------------|-------------------|--------------------|
| SG3293     | TcCLB.506053.20   | 0.0379559717792212 |
| SG5533     | TcCLB.510899.19   | 0.0382134936900715 |
| SG8857     | TcCLB.510817.60   | 0.0385180817134615 |
| SG5940     | TcCLB.509027.70   | 0.0386972528039116 |
| SG6655     | TcCLB.511185.10   | 0.0387538069627678 |
| SG0595     | TcCLB.504575.40   | 0.0389701372255616 |
| SG4582     | TcCLB.510519.70   | 0.0389701372255616 |
| SG6037     | TcCLB.507951.160  | 0.0390710806055403 |
| SG2624     | TcCLB.510533.90   | 0.0391624740322804 |
| SG6137     | TcCLB.508989.110  | 0.0394546274166853 |
| SG2468     | TcCLB.508859.100  | 0.0394725712904878 |
| SG3221     | TcCLB.508693.80   | 0.0394725712904878 |
| SG3906     | TcCLB.509047.40   | 0.0394725712904878 |
| SG3979     | TcCLB.510339.90   | 0.0394725712904878 |
| SG4774     | TcCLB.506629.30   | 0.0394782607216958 |
| SG2731     | TcCLB.504253.20   | 0.039724714877575  |
| SG7880     | TcCLB.511003.130  | 0.039724714877575  |
| SG8175     | TcCLB.510713.90   | 0.039764758751356  |
| SG3124     | TcCLB.506681.40   | 0.0400380172181985 |
| SG1970     | TcCLB.507081.20   | 0.0404024486952608 |
| SG3389     | TcCLB.506789.160  | 0.0404024486952608 |
| SG2844     | TcCLB.510889.340  | 0.040433245379459  |
| SG0464     | TcCLB.510339.50   | 0.0404389278039382 |
| SG4568     | TcCLB.511281.20   | 0.0404411507506733 |
| SG7923     | TcCLB.510187.120  | 0.0404649808443724 |
| SG6162     | TcCLB.511287.20   | 0.0405559425148824 |
| SG7221     | TcCLB.504557.40   | 0.0405559425148824 |
| SG3823     | TcCLB.510243.70   | 0.0409162555118501 |
| SG3970     | TcCLB.511529.170  | 0.0409162555118501 |
| SG0343     | TcCLB.457101.20   | 0.0410259338406147 |
| SG4333     | TcCLB.511863.20   | 0.0410422554342971 |
| SG4342     | TcCLB.506477.40   | 0.0410422554342971 |
| SG0211     | TcCLB.509197.10   | 0.041313297888569  |
| SG6013     | TcCLB.509965.190  | 0.0413813014438254 |
| SG3176     | TcCLB.511051.10   | 0.0413965425780877 |
| SG3878     | TcCLB.506151.30   | 0.0415460902821763 |
| SG8513     | TcCLB.509217.90   | 0.0415460902821763 |
| SG1469     | TcCLB.506297.190  | 0.0421234808673212 |
| SG7715     | TcCLB.511255.10   | 0.0421443039126296 |
| SG7269     | TcCLB.509583.19   | 0.0421749731909652 |
| SG3363     | TcCLB.504575.15   | 0.0422383434347604 |
| SG7129     | TcCLB.511215.110  | 0.0422383434347604 |
| SG7246     | TcCLB.506625.210  | 0.0422383434347604 |
| SG6390     | TcCLB.508911.30   | 0.0424829263543739 |
| SG3699     | TcCLB.510885.30   | 0.0424871534783405 |
| SG8711     | TcCLB.508817.130  | 0.0424871534783405 |
| SG8667     | TcCLB.511277.390  | 0.042912764355125  |
| SG0663     | TcCLB.503453.20   | 0.0429838552699992 |
| SG8564     | TcCLB.506583.4    | 0.0433098631034678 |
| SG2266     | TcCLB.508637.140  | 0.0434971326379826 |
| SG2944     | TcCLB.511867.80   | 0.043535152670073  |
| SG4928     | TcCLB.508593.40   | 0.0435436263805516 |
| SG8288     | TcCLB.508823.100  | 0.0436428878943503 |

| Supra gene | Representative ID | FDR                |
|------------|-------------------|--------------------|
| SG1714     | TcCLB.511245.20   | 0.0436913283535816 |
| SG2206     | TcCLB.506789.240  | 0.0437633302794056 |
| SG8170     | TcCLB.508827.50   | 0.0438208734142459 |
| SG1348     | TcCLB.508799.160  | 0.0439159152789787 |
| SG7697     | TcCLB.509999.80   | 0.043920798938238  |
| SG2330     | TcCLB.507609.30   | 0.0439398777368969 |
| SG0993     | TcCLB.507395.10   | 0.043959067254302  |
| SG1194     | TcCLB.506821.20   | 0.043959067254302  |
| SG1927     | TcCLB.510309.10   | 0.043959067254302  |
| SG6254     | TcCLB.504021.20   | 0.0441208569891137 |
| SG2073     | TcCLB.504137.40   | 0.044266808922451  |
| SG3073     | TcCLB.511239.70   | 0.044266808922451  |
| SG0371     | TcCLB.511337.10   | 0.0445109313628994 |
| SG8495     | TcCLB.504045.90   | 0.0445787621818405 |
| SG3695     | TcCLB.503939.30   | 0.0446069153531924 |
| SG6800     | TcCLB.510073.24   | 0.0446069153531924 |
| SG7021     | TcCLB.506501.110  | 0.0449451213503008 |
| SG7700     | TcCLB.510329.180  | 0.0449549334886646 |
| SG3452     | TcCLB.510729.80   | 0.0450042010705674 |
| SG6133     | TcCLB.507675.30   | 0.045035834264983  |
| SG3274     | TcCLB.508881.20   | 0.04517652165631   |
| SG4206     | TcCLB.504867.90   | 0.0453575749859937 |
| SG3357     | TcCLB.506363.140  | 0.0454271837547829 |
| SG3401     | TcCLB.506147.120  | 0.0454271837547829 |
| SG8379     | TcCLB.506247.330  | 0.0454404846218838 |
| SG1034     | TcCLB.508707.30   | 0.0454557515276075 |
| SG2507     | TcCLB.509755.10   | 0.0454557515276075 |
| SG3422     | TcCLB.509747.40   | 0.0457071612810093 |
| SG2884     | TcCLB.509047.14   | 0.0460226210110367 |
| SG3339     | TcCLB.506779.60   | 0.046063120788702  |
| SG4345     | TcCLB.506529.590  | 0.0460843241960591 |
| SG0542     | TcCLB.507711.60   | 0.0462078624954704 |
| SG6117     | TcCLB.508411.10   | 0.0463932420999465 |
| SG1788     | TcCLB.510731.20   | 0.0464047283437793 |
| SG4245     | TcCLB.503505.14   | 0.0464047283437793 |
| SG4211     | TcCLB.507317.30   | 0.0464197975643623 |
| SG0461     | TcCLB.511715.100  | 0.0465562248769442 |
| SG2335     | TcCLB.508737.187  | 0.046590626894939  |
| SG4942     | TcCLB.510045.30   | 0.046590626894939  |
| SG4565     | TcCLB.511295.50   | 0.0467002671926222 |
| SG1613     | TcCLB.511583.40   | 0.0467276501485576 |
| SG5989     | TcCLB.508919.70   | 0.046928024405811  |
| SG4024     | TcCLB.507029.10   | 0.0469858175154036 |
| SG6632     | TcCLB.507681.20   | 0.0471006391618186 |
| SG0528     | TcCLB.508411.40   | 0.0472712500881956 |
| SG6474     | TcCLB.506959.40   | 0.0472712500881956 |
| SG8765     | TcCLB.506679.120  | 0.0474605213762422 |
| SG2062     | TcCLB.509455.20   | 0.0476270761217261 |
| SG0733     | TcCLB.508153.370  | 0.0476876176013922 |
| SG0761     | TcCLB.506223.120  | 0.0476876176013922 |
| SG1818     | TcCLB.506779.110  | 0.0476876176013922 |
| SG3723     | TcCLB.507515.10   | 0.0476876176013922 |
| SG4799     | TcCLB.507073.49   | 0.0476876176013922 |

| Supra gene | Representative ID | FDR                |
|------------|-------------------|--------------------|
| SG6169     | TcCLB.510889.290  | 0.0476876176013922 |
| SG7938     | TcCLB.507069.120  | 0.0476876176013922 |
| SG3284     | TcCLB.507031.140  | 0.0479260512755389 |
| SG4688     | TcCLB.510421.200  | 0.0480523089813491 |
| SG2391     | TcCLB.507787.80   | 0.0480774357365509 |
| SG3112     | TcCLB.506459.280  | 0.0482001284789143 |
| SG1363     | TcCLB.508965.60   | 0.0483397144613407 |
| SG5356     | TcCLB.508135.10   | 0.0484196267872194 |
| SG3808     | TcCLB.506303.30   | 0.0484847218464798 |
| SG4775     | TcCLB.510265.10   | 0.048577447167535  |
| SG6422     | TcCLB.511461.60   | 0.0487677050655319 |
| SG1222     | TcCLB.511003.210  | 0.0490025419219358 |
| SG2274     | TcCLB.508441.20   | 0.0490865508359646 |
| SG5481     | TcCLB.504103.100  | 0.0491884615169351 |
| SG3598     | TcCLB.507787.40   | 0.0493172316541762 |
| SG5612     | TcCLB.511479.20   | 0.0494684347246492 |
| SG2301     | TcCLB.506779.90   | 0.0496356110755553 |
| SG1080     | TcCLB.506009.10   | 0.0497311422103978 |
| SG6549     | TcCLB.510889.80   | 0.0497585720854841 |
| SG1453     | TcCLB.510359.220  | 0.0498077959265358 |
| SG8074     | TcCLB.510187.234  | 0.0498693355141242 |
| SG0450     | TcCLB.509123.10   | 0.0500807453997024 |
| SG8598     | TcCLB.508823.130  | 0.0500807453997024 |
| SG6742     | TcCLB.508771.55   | 0.0501474412535114 |
| SG4472     | TcCLB.508821.30   | 0.0501652864302961 |
| SG7702     | TcCLB.506855.240  | 0.050653072300091  |
| SG5715     | TcCLB.510329.220  | 0.0506878847163705 |
| SG3343     | TcCLB.511483.10   | 0.0508551085015576 |
| SG5657     | TcCLB.509499.38   | 0.0509465839448089 |
| SG4476     | TcCLB.506303.80   | 0.050984846871435  |
| SG3099     | TcCLB.511817.210  | 0.051281273766446  |
| SG0908     | TcCLB.510145.10   | 0.0513499877623172 |
| SG1599     | TcCLB.510191.40   | 0.0515765642705693 |
| SG6951     | TcCLB.506925.460  | 0.0517264704321596 |
| SG6852     | TcCLB.511867.110  | 0.051792232460469  |
| SG6613     | TcCLB.510121.20   | 0.0518375943868954 |
| SG8410     | TcCLB.510419.20   | 0.0518983777927075 |
| SG6599     | TcCLB.511817.20   | 0.0519206035907128 |
| SG7595     | TcCLB.509699.110  | 0.0519522068882168 |
| SG5865     | TcCLB.509177.50   | 0.0520328252721572 |
| SG7169     | TcCLB.504153.70   | 0.0520328252721572 |
| SG4577     | TcCLB.510357.20   | 0.0521497771665042 |
| SG1096     | TcCLB.509965.350  | 0.0521796896021011 |
| SG3318     | TcCLB.511277.554  | 0.0522677801868011 |
| SG6420     | TcCLB.506839.34   | 0.0523439807489839 |
| SG1772     | TcCLB.508015.40   | 0.0524893297519605 |
| SG4114     | TcCLB.511245.79   | 0.0525303068345575 |
| SG4549     | TcCLB.511755.50   | 0.0528064032319547 |
| SG2718     | TcCLB.504797.10   | 0.052809927405007  |
| SG3044     | TcCLB.511439.60   | 0.0528604748829258 |
| SG6535     | TcCLB.508569.90   | 0.0529386734734323 |
| SG0650     | TcCLB.506181.70   | 0.0530163653322485 |
| SG2824     | TcCLB.509005.60   | 0.0530163653322485 |

| Supra gene | Representative ID | FDR                |
|------------|-------------------|--------------------|
| SG1055     | TcCLB.506181.20   | 0.0530675319256549 |
| SG8357     | TcCLB.506559.380  | 0.0533345409820853 |
| SG5206     | TcCLB.508153.800  | 0.0535354715759467 |
| SG7024     | TcCLB.504153.190  | 0.0535902180494879 |
| SG4536     | TcCLB.506319.70   | 0.0540590411081178 |
| SG2563     | TcCLB.508277.310  | 0.0542977772924047 |
| SG1525     | TcCLB.509119.30   | 0.0543762447149829 |
| SG3510     | TcCLB.507159.30   | 0.0544436008521921 |
| SG4431     | TcCLB.510031.20   | 0.0544436008521921 |
| SG0322     | TcCLB.511061.20   | 0.0546691487176959 |
| SG3730     | TcCLB.511907.210  | 0.0546691487176959 |
| SG4627     | TcCLB.506559.70   | 0.0549354170768622 |
| SG1072     | TcCLB.511309.20   | 0.0551977853317594 |
| SG1253     | TcCLB.504827.80   | 0.0552700605187831 |
| SG7167     | TcCLB.509769.36   | 0.0553261235153156 |
| SG0691     | TcCLB.508215.9    | 0.0553910585961348 |
| SG6295     | TcCLB.506755.180  | 0.0553910585961348 |
| SG2913     | TcCLB.508349.30   | 0.0554972098290631 |
| SG3373     | TcCLB.510763.60   | 0.0558553706636914 |
| SG5918     | TcCLB.506629.50   | 0.0561811345154106 |
| SG5508     | TcCLB.504111.10   | 0.0561906263078858 |
| SG8550     | TcCLB.504105.40   | 0.0562428504505753 |
| SG6454     | TcCLB.511229.70   | 0.0563753756092139 |
| SG8380     | TcCLB.504109.160  | 0.0563753756092139 |
| SG4411     | TcCLB.506691.70   | 0.0565057842447591 |
| SG4137     | TcCLB.510753.30   | 0.0565536632442374 |
| SG0024     | TcCLB.404711.10   | 0.0565544209622738 |
| SG0679     | TcCLB.510943.50   | 0.056645168509797  |
| SG7732     | TcCLB.511633.70   | 0.0568116112713591 |
| SG2879     | TcCLB.511661.90   | 0.0568184369015285 |
| SG8818     | TcCLB.506559.400  | 0.0568184369015285 |
| SG4567     | TcCLB.508851.154  | 0.0569903472462506 |
| SG1417     | TcCLB.510299.70   | 0.0570853734368371 |
| SG1673     | TcCLB.506201.39   | 0.0571412158126751 |
| SG2392     | TcCLB.507081.110  | 0.0572711013779238 |
| SG0612     | TcCLB.507627.9    | 0.0573583001477155 |
| SG2433     | TcCLB.508707.224  | 0.0574822256877855 |
| SG2586     | TcCLB.508741.330  | 0.0574822256877855 |
| SG4367     | TcCLB.503733.20   | 0.0575535043293896 |
| SG4601     | TcCLB.506979.30   | 0.0576036242324921 |
| SG0521     | TcCLB.455721.9    | 0.0577166337539089 |
| SG5433     | TcCLB.458759.14   | 0.0578182248853246 |
| SG5524     | TcCLB.507825.40   | 0.0578182248853246 |
| SG4092     | TcCLB.511285.100  | 0.0579197540279227 |
| SG6009     | TcCLB.509717.40   | 0.0580534081383594 |
| SG3789     | TcCLB.510887.50   | 0.0580934506924959 |
| SG7551     | TcCLB.507641.170  | 0.0580934506924959 |
| SG1758     | TcCLB.504149.175  | 0.0582270378463485 |
| SG2733     | TcCLB.506435.50   | 0.0582270378463485 |
| SG4144     | TcCLB.503415.40   | 0.0583184801036434 |
| SG4819     | TcCLB.507801.110  | 0.0583289400656182 |
| SG5253     | TcCLB.508613.50   | 0.0584028869943701 |
| SG5560     | TcCLB.510299.20   | 0.0586700841277552 |



| Supra gene | Representative ID | FDR                |
|------------|-------------------|--------------------|
| SG6047     | TcCLB.510123.60   | 0.0588364627068812 |
| SG1297     | TcCLB.506529.260  | 0.0589083598626172 |
| SG4818     | TcCLB.509671.99   | 0.0589083598626172 |
| SG0501     | TcCLB.510203.49   | 0.0589607498810889 |
| SG3639     | TcCLB.511907.50   | 0.0595780121927051 |
| SG3229     | TcCLB.509893.20   | 0.0597295748373882 |
| SG5577     | TcCLB.509067.60   | 0.0597943284061327 |
| SG5403     | TcCLB.508707.10   | 0.060303818930766  |
| SG5119     | TcCLB.503847.30   | 0.0603665801972592 |
| SG5933     | TcCLB.510889.221  | 0.0607347208943947 |
| SG1834     | TcCLB.510691.30   | 0.0607932848810072 |
| SG3215     | TcCLB.510889.251  | 0.0607932848810072 |
| SG5000     | TcCLB.506975.69   | 0.0607932848810072 |
| SG5827     | TcCLB.508545.20   | 0.0607932848810072 |
| SG6952     | TcCLB.506925.260  | 0.0607932848810072 |
| SG4201     | TcCLB.508809.50   | 0.0609075125878102 |
| SG7997     | TcCLB.508153.150  | 0.0609623912356355 |
| SG1765     | TcCLB.511287.110  | 0.0613543379088923 |
| SG4284     | TcCLB.509551.60   | 0.0619306798546065 |
| SG6481     | TcCLB.511385.60   | 0.0621832168631343 |
| SG6783     | TcCLB.511603.70   | 0.0621977092760956 |
| SG2777     | TcCLB.511671.80   | 0.0622122086679597 |
| SG8303     | TcCLB.504045.50   | 0.0622122086679597 |
| SG2859     | TcCLB.508231.220  | 0.0624323864742793 |
| SG3423     | TcCLB.508269.30   | 0.0629334400657069 |
| SG8643     | TcCLB.510087.90   | 0.0629334400657069 |
| SG4796     | TcCLB.508637.114  | 0.0630667711200911 |
| SG7612     | TcCLB.509589.50   | 0.063359890454194  |
| SG5493     | TcCLB.510661.190  | 0.0640379305905344 |
| SG2088     | TcCLB.508241.100  | 0.0642565461942685 |
| SG0284     | TcCLB.511807.100  | 0.0643198796763957 |
| SG4445     | TcCLB.506275.50   | 0.0645471342834234 |
| SG3426     | TcCLB.503809.120  | 0.0645990094564336 |
| SG2436     | TcCLB.511717.110  | 0.0647573589433367 |
| SG5279     | TcCLB.510863.20   | 0.0647573589433367 |
| SG7913     | TcCLB.504109.180  | 0.0649351866189085 |
| SG6332     | TcCLB.506009.30   | 0.0649518326397335 |
| SG8116     | TcCLB.511727.40   | 0.064961301174451  |
| SG6173     | TcCLB.511815.60   | 0.0650290900937231 |
| SG7477     | TcCLB.506925.64   | 0.0652207912255726 |
| SG0987     | TcCLB.507031.20   | 0.0654891730582357 |
| SG3367     | TcCLB.508577.150  | 0.0654891730582357 |
| SG7046     | TcCLB.504153.150  | 0.0655190173616166 |
| SG4224     | TcCLB.509065.120  | 0.0655247540419203 |
| SG2135     | TcCLB.511269.50   | 0.0656353409965858 |
| SG7818     | TcCLB.509527.30   | 0.0656484491858236 |
| SG3627     | TcCLB.506925.360  | 0.0661231084250799 |
| SG5482     | TcCLB.511511.70   | 0.0663507621157201 |
| SG5652     | TcCLB.506435.390  | 0.0663507621157201 |
| SG7846     | TcCLB.508461.270  | 0.0663507621157201 |
| SG2620     | TcCLB.510421.320  | 0.0664633458579124 |
| SG3244     | TcCLB.509105.4    | 0.0664633458579124 |
| SG1800     | TcCLB.505037.50   | 0.0664823774725415 |

| Supra gene | Representative ID | FDR                |
|------------|-------------------|--------------------|
| SG8734     | TcCLB.508897.70   | 0.0664823774725415 |
| SG4349     | TcCLB.503581.30   | 0.066485866068248  |
| SG8134     | TcCLB.506425.90   | 0.0665369211238544 |
| SG5737     | TcCLB.510173.110  | 0.0668225713786635 |
| SG4269     | TcCLB.511017.50   | 0.0668432289316217 |
| SG8467     | TcCLB.506247.340  | 0.0668432289316217 |
| SG1444     | TcCLB.503697.40   | 0.0668466636826739 |
| SG2599     | TcCLB.506247.30   | 0.0668466636826739 |
| SG8962     | TcCLB.506475.130  | 0.0668466636826739 |
| SG2761     | TcCLB.503939.40   | 0.0672186380338135 |
| SG5231     | TcCLB.508543.100  | 0.0674127509339835 |
| SG4200     | TcCLB.507519.30   | 0.0675053279929353 |
| SG6684     | TcCLB.504081.420  | 0.0677800912658754 |
| SG1442     | TcCLB.511499.50   | 0.0677809399402998 |
| SG3058     | TcCLB.510575.120  | 0.0678977670045203 |
| SG6552     | TcCLB.511247.9    | 0.0678977670045203 |
| SG0685     | TcCLB.503899.119  | 0.0679675130343318 |
| SG0603     | TcCLB.509647.190  | 0.0680806723880972 |
| SG6619     | TcCLB.508153.994  | 0.0681164085005452 |
| SG8065     | TcCLB.506883.100  | 0.0681570906031252 |
| SG8017     | TcCLB.508479.230  | 0.0682391071544555 |
| SG2071     | TcCLB.508661.40   | 0.0682479723225914 |
| SG4625     | TcCLB.510227.20   | 0.0683220354768368 |
| SG6461     | TcCLB.511827.64   | 0.0684014459555014 |
| SG2480     | TcCLB.503987.60   | 0.0687023257876851 |
| SG1125     | TcCLB.506789.290  | 0.0688122660327232 |
| SG0132     | TcCLB.507633.80   | 0.0690173162391881 |
| SG4454     | TcCLB.506573.70   | 0.0690173162391881 |
| SG4477     | TcCLB.506979.20   | 0.0690173162391881 |
| SG8473     | TcCLB.507053.90   | 0.069074400717208  |
| SG8652     | TcCLB.511809.20   | 0.069074400717208  |
| SG6820     | TcCLB.503905.30   | 0.0692315553555577 |
| SG6845     | TcCLB.511421.50   | 0.0696363126742015 |
| SG1615     | TcCLB.511761.10   | 0.0697009149053877 |
| SG0099     | TcCLB.510583.74   | 0.0697011860267773 |
| SG0447     | TcCLB.510441.41   | 0.0697011860267773 |
| SG2868     | TcCLB.510575.20   | 0.0697011860267773 |
| SG5774     | TcCLB.510053.50   | 0.0697011860267773 |
| SG2849     | TcCLB.511759.40   | 0.0699790758582585 |
| SG4626     | TcCLB.509049.20   | 0.0699790758582585 |
| SG5574     | TcCLB.509569.50   | 0.0699790758582585 |
| SG4871     | TcCLB.509875.170  | 0.0702498866647948 |
| SG4651     | TcCLB.507011.110  | 0.0704213295654311 |
| SG2155     | TcCLB.511511.50   | 0.0704390752424477 |
| SG6857     | TcCLB.503425.20   | 0.0704730820547731 |
| SG1711     | TcCLB.509991.9    | 0.0704742926254287 |
| SG0139     | TcCLB.508437.20   | 0.0708951743631492 |
| SG4537     | TcCLB.507017.40   | 0.07095397257445   |
| SG5417     | TcCLB.507081.50   | 0.0711468115987829 |
| SG1431     | TcCLB.507771.30   | 0.0713087117823586 |
| SG7344     | TcCLB.507747.130  | 0.0713969045423485 |
| SG5702     | TcCLB.506287.140  | 0.0714337447850776 |
| SG6394     | TcCLB.507041.120  | 0.0715190187149118 |

| Supra gene | Representative ID | FDR                |
|------------|-------------------|--------------------|
| SG0068     | TcCLB.508221.350  | 0.0716374570958416 |
| SG2811     | TcCLB.506303.90   | 0.0716374570958416 |
| SG5422     | TcCLB.509211.30   | 0.0716374570958416 |
| SG5480     | TcCLB.509033.50   | 0.0718713931026021 |
| SG6429     | TcCLB.503679.10   | 0.0719016568336223 |
| SG4097     | TcCLB.511685.60   | 0.0720725662571293 |
| SG1184     | TcCLB.503525.20   | 0.0721906300465092 |
| SG2883     | TcCLB.511131.89   | 0.0721906300465092 |
| SG8808     | TcCLB.508689.30   | 0.0721906300465092 |
| SG4417     | TcCLB.503939.110  | 0.0722263206474852 |
| SG2831     | TcCLB.506841.8    | 0.0722633967296315 |
| SG6586     | TcCLB.508593.140  | 0.0722633967296315 |
| SG1627     | TcCLB.509331.80   | 0.072384807148986  |
| SG5449     | TcCLB.507669.190  | 0.072384807148986  |
| SG3674     | TcCLB.510599.30   | 0.0725940473610002 |
| SG3180     | TcCLB.506529.250  | 0.0726113330581769 |
| SG5396     | TcCLB.507539.40   | 0.0726417998869345 |
| SG0874     | TcCLB.511301.100  | 0.0727960630320004 |
| SG4616     | TcCLB.507317.34   | 0.0730177384772314 |
| SG3763     | TcCLB.511717.180  | 0.0731937152344542 |
| SG5399     | TcCLB.511385.40   | 0.0731937152344542 |
| SG8026     | TcCLB.506279.10   | 0.07329852342971   |
| SG8405     | TcCLB.504105.100  | 0.0735224371165888 |
| SG8911     | TcCLB.509061.10   | 0.0737743882952996 |
| SG2961     | TcCLB.511233.100  | 0.0738787228328136 |
| SG3519     | TcCLB.509055.44   | 0.0738787228328136 |
| SG5063     | TcCLB.511165.80   | 0.0741889777736724 |
| SG7877     | TcCLB.504123.10   | 0.0742098964419448 |
| SG0096     | TcCLB.453767.20   | 0.0742203006277466 |
| SG4975     | TcCLB.508257.104  | 0.074278724125403  |
| SG1513     | TcCLB.503913.40   | 0.0743306318202195 |
| SG1532     | TcCLB.508741.290  | 0.0744624442686605 |
| SG6582     | TcCLB.505999.90   | 0.0744624442686605 |
| SG8395     | TcCLB.508257.120  | 0.0744624442686605 |
| SG8412     | TcCLB.511277.410  | 0.0744624442686605 |
| SG5929     | TcCLB.507831.70   | 0.0744882183084542 |
| SG8274     | TcCLB.510901.200  | 0.0749343523983445 |
| SG2797     | TcCLB.506959.94   | 0.0749380332199075 |
| SG6638     | TcCLB.508461.310  | 0.0749380332199075 |
| SG7610     | TcCLB.507039.41   | 0.0749380332199075 |
| SG2529     | TcCLB.507663.80   | 0.0750057950255213 |
| SG5101     | TcCLB.508355.20   | 0.0755935356390494 |
| SG1487     | TcCLB.509157.120  | 0.07579274448177   |
| SG5045     | TcCLB.503541.10   | 0.0771167364332646 |
| SG8238     | TcCLB.511755.80   | 0.0779607816441421 |
| SG4899     | TcCLB.506753.230  | 0.0781828108416116 |
| SG4480     | TcCLB.507001.50   | 0.0784666962989707 |
| SG8650     | TcCLB.510363.250  | 0.0784666962989707 |
| SG2291     | TcCLB.511127.50   | 0.0784870062674475 |
| SG7930     | TcCLB.511491.20   | 0.0788298362585787 |
| SG7686     | TcCLB.511807.256  | 0.078873025222089  |
| SG1592     | TcCLB.510525.130  | 0.078887864738084  |
| SG6192     | TcCLB.503749.30   | 0.0788937275262295 |

| Supra gene | Representative ID | FDR                |
|------------|-------------------|--------------------|
| SG3191     | TcCLB.509007.90   | 0.0789855457165849 |
| SG5342     | TcCLB.508501.300  | 0.0792992300018244 |
| SG4862     | TcCLB.505071.30   | 0.0796409538424907 |
| SG2260     | TcCLB.509027.50   | 0.0797195204040909 |
| SG7100     | TcCLB.508163.250  | 0.0798097585945882 |
| SG1307     | TcCLB.504741.180  | 0.0804088861113591 |
| SG7987     | TcCLB.508461.140  | 0.0805090685074584 |
| SG2078     | TcCLB.511741.10   | 0.0805639614689151 |
| SG7070     | TcCLB.508647.140  | 0.0805639614689151 |
| SG8181     | TcCLB.511725.100  | 0.0805934670423466 |
| SG1565     | TcCLB.506821.100  | 0.0807086395010236 |
| SG7859     | TcCLB.504071.20   | 0.0808133935534235 |
| SG8689     | TcCLB.511277.310  | 0.0808425846511021 |
| SG1061     | TcCLB.503865.70   | 0.0809141499149659 |
| SG4448     | TcCLB.508891.60   | 0.0809141499149659 |
| SG1752     | TcCLB.507519.154  | 0.0810300237720687 |
| SG4941     | TcCLB.510359.20   | 0.0810337104306546 |
| SG0636     | TcCLB.503643.20   | 0.0812322134217005 |
| SG4435     | TcCLB.508153.840  | 0.0812322134217005 |
| SG4093     | TcCLB.503837.20   | 0.0812603954712271 |
| SG4995     | TcCLB.508153.340  | 0.0813052077329376 |
| SG7071     | TcCLB.509233.140  | 0.0820273802743799 |
| SG4155     | TcCLB.508637.63   | 0.0820800648910175 |
| SG8225     | TcCLB.508897.40   | 0.0821806174354821 |
| SG3279     | TcCLB.510943.23   | 0.0822168092443454 |
| SG4232     | TcCLB.507849.70   | 0.0822168092443454 |
| SG4440     | TcCLB.510969.40   | 0.0822168092443454 |
| SG6457     | TcCLB.511857.70   | 0.0822168092443454 |
| SG7584     | TcCLB.506625.60   | 0.0822168092443454 |
| SG5394     | TcCLB.506559.59   | 0.0822997600365899 |
| SG7684     | TcCLB.511295.30   | 0.0822997600365899 |
| SG3905     | TcCLB.504069.34   | 0.0824497437017642 |
| SG8653     | TcCLB.509733.100  | 0.0824497437017642 |
| SG4134     | TcCLB.503703.10   | 0.0824502024625818 |
| SG2523     | TcCLB.510611.70   | 0.0824551945588785 |
| SG3472     | TcCLB.509637.27   | 0.0824551945588785 |
| SG5397     | TcCLB.509105.80   | 0.0824551945588785 |
| SG5964     | TcCLB.510155.90   | 0.0824551945588785 |
| SG8216     | TcCLB.508409.140  | 0.0825263706940327 |
| SG8701     | TcCLB.510901.100  | 0.0827459963365546 |
| SG4259     | TcCLB.504079.10   | 0.0828678005596385 |
| SG6653     | TcCLB.508871.40   | 0.0828712278676422 |
| SG2175     | TcCLB.511735.70   | 0.0828844834851452 |
| SG5234     | TcCLB.503557.40   | 0.0829040219061219 |
| SG2222     | TcCLB.507519.160  | 0.0832341344649712 |
| SG3852     | TcCLB.511867.20   | 0.0832341344649712 |
| SG5001     | TcCLB.508501.230  | 0.0832341344649712 |
| SG6132     | TcCLB.510355.230  | 0.0832341344649712 |
| SG4099     | TcCLB.510889.50   | 0.0832597580664928 |
| SG5408     | TcCLB.508507.50   | 0.0833069345081504 |
| SG8921     | TcCLB.506627.20   | 0.0833069345081504 |
| SG3052     | TcCLB.510661.270  | 0.0833449598365014 |
| SG2126     | TcCLB.509611.50   | 0.0834703765458583 |

| Supra gene | Representative ID | FDR                |
|------------|-------------------|--------------------|
| SG6696     | TcCLB.508693.10   | 0.0834703765458583 |
| SG8167     | TcCLB.504109.70   | 0.0834703765458583 |
| SG0783     | TcCLB.506973.120  | 0.0834803287948011 |
| SG3646     | TcCLB.511277.560  | 0.0834803287948011 |
| SG6503     | TcCLB.509287.60   | 0.0835406820987464 |
| SG2880     | TcCLB.504069.80   | 0.0838215304438707 |
| SG4415     | TcCLB.504045.114  | 0.0841138489399462 |
| SG8770     | TcCLB.506337.160  | 0.0841227055027862 |
| SG8687     | TcCLB.506559.454  | 0.0841850032137526 |
| SG1433     | TcCLB.511577.188  | 0.0842591874717663 |
| SG1474     | TcCLB.504741.20   | 0.0843484399967441 |
| SG2475     | TcCLB.509767.44   | 0.084448732962577  |
| SG7239     | TcCLB.508813.70   | 0.0844751658614029 |
| SG0123     | TcCLB.506011.10   | 0.0851146303549555 |
| SG0518     | TcCLB.511833.10   | 0.0851315809084655 |
| SG2959     | TcCLB.511287.100  | 0.085261773055103  |
| SG7421     | TcCLB.511215.30   | 0.085261773055103  |
| SG3429     | TcCLB.503925.60   | 0.0857214721365524 |
| SG8265     | TcCLB.510693.120  | 0.0857366147889045 |
| SG4407     | TcCLB.510911.30   | 0.0859126144423664 |
| SG8519     | TcCLB.511725.280  | 0.0859253914616514 |
| SG2512     | TcCLB.511249.10   | 0.0863648392743642 |
| SG8038     | TcCLB.506279.60   | 0.0863648392743642 |
| SG7961     | TcCLB.504123.40   | 0.086373264779343  |
| SG7666     | TcCLB.508409.40   | 0.0865526181146178 |
| SG7754     | TcCLB.508479.310  | 0.0866520588512349 |
| SG3559     | TcCLB.506581.20   | 0.0868098915006203 |
| SG3133     | TcCLB.506915.10   | 0.0868812861541381 |
| SG1928     | TcCLB.507795.100  | 0.0870906919201407 |
| SG2611     | TcCLB.511625.74   | 0.0870906919201407 |
| SG5141     | TcCLB.506303.50   | 0.0870906919201407 |
| SG6250     | TcCLB.507049.170  | 0.0870906919201407 |
| SG8322     | TcCLB.511367.280  | 0.0870906919201407 |
| SG8491     | TcCLB.507063.290  | 0.0870906919201407 |
| SG0580     | TcCLB.504215.30   | 0.087101059721794  |
| SG0151     | TcCLB.506267.39   | 0.087181445093298  |
| SG4020     | TcCLB.503513.10   | 0.087181445093298  |
| SG4166     | TcCLB.511277.70   | 0.087181445093298  |
| SG5097     | TcCLB.506815.40   | 0.087181445093298  |
| SG7141     | TcCLB.508307.134  | 0.087181445093298  |
| SG8885     | TcCLB.506335.69   | 0.0872462833663134 |
| SG6624     | TcCLB.506955.240  | 0.0872745377490636 |
| SG3690     | TcCLB.508405.110  | 0.0874555979107065 |
| SG5847     | TcCLB.506575.20   | 0.0874576746769488 |
| SG1153     | TcCLB.507737.30   | 0.0876580360806523 |
| SG1660     | TcCLB.509607.40   | 0.0876580360806523 |
| SG8392     | TcCLB.508461.400  | 0.0876580360806523 |
| SG8420     | TcCLB.506155.70   | 0.0876580360806523 |
| SG1507     | TcCLB.511143.12   | 0.0877843146616868 |
| SG8428     | TcCLB.507053.40   | 0.0877843146616868 |
| SG4346     | TcCLB.511817.120  | 0.0884477947505305 |
| SG2001     | TcCLB.509671.130  | 0.0896396954821668 |
| SG7861     | TcCLB.508233.30   | 0.08973432851182   |

| Supra gene | Representative ID | FDR                |
|------------|-------------------|--------------------|
| SG7177     | TcCLB.504149.70   | 0.0898625696519495 |
| SG1218     | TcCLB.509007.20   | 0.0900706903123165 |
| SG2544     | TcCLB.510431.70   | 0.0902092406263655 |
| SG8125     | TcCLB.507681.60   | 0.0902406922316488 |
| SG4647     | TcCLB.508409.280  | 0.0902486086766382 |
| SG4959     | TcCLB.509233.230  | 0.0902486086766382 |
| SG2228     | TcCLB.511589.50   | 0.0902899414562521 |
| SG3785     | TcCLB.511269.40   | 0.0902899414562521 |
| SG7275     | TcCLB.509433.30   | 0.0903129640995301 |
| SG5833     | TcCLB.506697.10   | 0.0903322867929645 |
| SG2031     | TcCLB.506399.70   | 0.0905168214998266 |
| SG3006     | TcCLB.509105.50   | 0.09072222526849   |
| SG3408     | TcCLB.511389.150  | 0.09072222526849   |
| SG6473     | TcCLB.508871.150  | 0.09072222526849   |
| SG0057     | TcCLB.507069.160  | 0.0908595156897482 |
| SG0652     | TcCLB.508865.4    | 0.0911426082717763 |
| SG8775     | TcCLB.511837.60   | 0.0911676504315324 |
| SG0474     | TcCLB.508939.60   | 0.0911693297663588 |
| SG1069     | TcCLB.507165.10   | 0.0912898529900757 |
| SG0328     | TcCLB.507533.21   | 0.0914908283159619 |
| SG1300     | TcCLB.503635.89   | 0.0914908283159619 |
| SG6122     | TcCLB.511277.10   | 0.0916083985809293 |
| SG1170     | TcCLB.504033.180  | 0.0917886571551925 |
| SG2939     | TcCLB.508175.133  | 0.0917886571551925 |
| SG7437     | TcCLB.508647.130  | 0.0922903831769584 |
| SG8350     | TcCLB.510483.250  | 0.09238045865418   |
| SG2786     | TcCLB.503975.70   | 0.0925419925017157 |
| SG6659     | TcCLB.511003.200  | 0.0926051961324844 |
| SG3276     | TcCLB.510945.60   | 0.0926967246880749 |
| SG6607     | TcCLB.506885.200  | 0.0928027255393379 |
| SG1756     | TcCLB.510895.20   | 0.0928613595891275 |
| SG2578     | TcCLB.506883.40   | 0.0928613595891275 |
| SG7409     | TcCLB.504149.30   | 0.0928613595891275 |
| SG4820     | TcCLB.504153.310  | 0.0931748816743076 |
| SG1394     | TcCLB.507793.30   | 0.0931986849529638 |
| SG1979     | TcCLB.503979.10   | 0.0931986849529638 |
| SG3412     | TcCLB.506303.130  | 0.0931986849529638 |
| SG8114     | TcCLB.506489.20   | 0.0932039693898118 |
| SG6912     | TcCLB.507093.160  | 0.0932162044916094 |
| SG5230     | TcCLB.510665.60   | 0.0932283983234268 |
| SG6480     | TcCLB.508919.140  | 0.0932283983234268 |
| SG8892     | TcCLB.508815.160  | 0.0935228189491639 |
| SG2263     | TcCLB.507029.60   | 0.0936361306570026 |
| SG3107     | TcCLB.511515.20   | 0.0936361306570026 |
| SG4192     | TcCLB.503723.70   | 0.0936361306570026 |
| SG5517     | TcCLB.504161.30   | 0.09436417475739   |
| SG6789     | TcCLB.506767.110  | 0.09436417475739   |
| SG2872     | TcCLB.511287.80   | 0.0944777152629834 |
| SG2874     | TcCLB.508387.50   | 0.0945300998734151 |
| SG0340     | TcCLB.511825.200  | 0.0945861148835774 |
| SG8120     | TcCLB.508461.470  | 0.0948451782202051 |
| SG5060     | TcCLB.508443.20   | 0.0948835698749852 |
| SG5707     | TcCLB.504741.80   | 0.0950424399709621 |

| Supra gene | Representative ID | FDR                |
|------------|-------------------|--------------------|
| SG3704     | TcCLB.506327.40   | 0.0956922817534839 |
| SG4369     | TcCLB.511167.40   | 0.0956922817534839 |
| SG1155     | TcCLB.506201.110  | 0.0959233367952753 |
| SG4031     | TcCLB.508857.160  | 0.0959233367952753 |
| SG5051     | TcCLB.506459.250  | 0.0964152598894408 |
| SG7839     | TcCLB.507623.125  | 0.0967964732507089 |
| SG8027     | TcCLB.508737.10   | 0.096900949774961  |
| SG4359     | TcCLB.511389.114  | 0.0972888032866426 |
| SG6433     | TcCLB.507063.130  | 0.0977937967673051 |
| SG2140     | TcCLB.509805.70   | 0.097813409205511  |
| SG3873     | TcCLB.507609.20   | 0.097813409205511  |
| SG5339     | TcCLB.511431.90   | 0.097813409205511  |
| SG2341     | TcCLB.503999.20   | 0.0979034219602578 |
| SG3386     | TcCLB.506973.10   | 0.0979034219602578 |
| SG3702     | TcCLB.509695.140  | 0.0979034219602578 |
| SG0264     | TcCLB.508805.30   | 0.0979165123032869 |
| SG4280     | TcCLB.509611.89   | 0.0982231111391965 |
| SG8753     | TcCLB.482319.10   | 0.0987521315591127 |
| SG4062     | TcCLB.503929.30   | 0.0988174037328077 |
| SG7059     | TcCLB.508103.14   | 0.0990596059097071 |
| SG4996     | TcCLB.507257.90   | 0.0992444489377231 |
| SG5911     | TcCLB.508507.59   | 0.0992444489377231 |
| SG3552     | TcCLB.511301.120  | 0.0994236792693351 |

\*: complete statistical data and reads per kilobase million (RPKM) values can be obtained directly from the corresponding author.

TABLE IV  
List of differentially expressed genes (DEGs) with their respective false discovery rates (FDR) for polysomal/granular (P/G) RNA fraction

| Supra gene | Representative ID | FDR                  |
|------------|-------------------|----------------------|
|            | FDR < 0.001       |                      |
|            | FDR < 0.01        |                      |
|            | FDR < 0.1         |                      |
| SG0346     | TcCLB.504223.20   | 1.10750041328772e-05 |
| SG2855     | TcCLB.511277.60   | 1.10750041328772e-05 |
| SG4050     | TcCLB.506193.60   | 1.10750041328772e-05 |
| SG5814     | TcCLB.511511.20   | 1.10750041328772e-05 |
| SG6583     | TcCLB.503925.80   | 1.13651105152301e-05 |
| SG7998     | TcCLB.511511.3    | 1.20678177166239e-05 |
| SG6137     | TcCLB.508989.110  | 1.24179671629177e-05 |
| SG6103     | TcCLB.511719.30   | 1.35544261626548e-12 |
| SG4776     | TcCLB.508153.620  | 1.52532207600721e-06 |
| SG6597     | TcCLB.509999.140  | 1.52532207600721e-06 |
| SG8425     | TcCLB.507019.30   | 1.52883980001481e-05 |
| SG8683     | TcCLB.506247.190  | 1.55340772823491e-07 |
| SG5160     | TcCLB.508625.130  | 1.72804203740115e-08 |
| SG1448     | TcCLB.503555.40   | 2.39055664232696e-05 |
| SG2389     | TcCLB.506211.250  | 2.67871942029032e-05 |
| SG2142     | TcCLB.509429.280  | 2.79468380993562e-07 |
| SG7053     | TcCLB.508813.60   | 2.93996734588475e-14 |



| Supra gene | Representative ID | FDR                  |
|------------|-------------------|----------------------|
| SG5858     | TcCLB.504229.110  | 2.97240874183142e-05 |
| SG7767     | TcCLB.507019.20   | 2.97240874183142e-05 |
| SG3037     | TcCLB.503525.4    | 3.01142180988915e-05 |
| SG1958     | TcCLB.508399.10   | 3.07027719914146e-07 |
| SG6879     | TcCLB.506635.139  | 3.12602484975416e-07 |
| SG3604     | TcCLB.507023.50   | 3.51936767559477e-06 |
| SG3861     | TcCLB.510423.50   | 3.51936767559477e-06 |
| SG5170     | TcCLB.504069.90   | 3.51936767559477e-06 |
| SG2870     | TcCLB.510581.20   | 3.55310876829993e-05 |
| SG4032     | TcCLB.510877.170  | 3.58893691394966e-06 |
| SG3019     | TcCLB.506241.160  | 3.93697378998175e-05 |
| SG3329     | TcCLB.508307.180  | 3.93697378998175e-05 |
| SG3769     | TcCLB.509713.30   | 3.93697378998175e-05 |
| SG6638     | TcCLB.508461.310  | 3.93697378998175e-05 |
| SG1355     | TcCLB.503565.29   | 4.05673913424211e-05 |
| SG6601     | TcCLB.511633.79   | 4.28626032451508e-06 |
| SG0661     | TcCLB.458241.10   | 4.83879935766689e-05 |
| SG3295     | TcCLB.509161.10   | 4.83879935766689e-05 |
| SG3246     | TcCLB.511295.60   | 5.29083279844227e-05 |
| SG3970     | TcCLB.511529.170  | 5.29083279844227e-05 |
| SG1080     | TcCLB.506009.10   | 5.50480297210861e-06 |
| SG7577     | TcCLB.506553.20   | 5.55520529452781e-05 |
| SG2828     | TcCLB.504199.20   | 5.56396567478124e-06 |
| SG4532     | TcCLB.511825.240  | 5.56396567478124e-06 |
| SG8807     | TcCLB.508173.180  | 5.90885386624956e-05 |
| SG4917     | TcCLB.507775.10   | 6.00940273242952e-06 |
| SG8050     | TcCLB.508017.30   | 6.07533300141629e-05 |
| SG4075     | TcCLB.508547.140  | 6.11974268624481e-05 |
| SG5493     | TcCLB.510661.190  | 6.62784798587688e-06 |
| SG1473     | TcCLB.507801.114  | 6.7165588577419e-05  |
| SG0088     | TcCLB.510217.10   | 6.97261583645192e-11 |
| SG0148     | TcCLB.511325.40   | 7.10019577571621e-05 |
| SG0908     | TcCLB.510145.10   | 7.36790129553302e-05 |
| SG8318     | TcCLB.508799.240  | 7.42673323043136e-07 |
| SG2019     | TcCLB.509109.160  | 8.23118769999791e-05 |
| SG7779     | TcCLB.508173.40   | 8.38697874693883e-05 |
| SG1276     | TcCLB.509601.140  | 8.40120944611799e-07 |
| SG5338     | TcCLB.503653.60   | 9.32438418013464e-05 |
| SG1642     | TcCLB.505183.30   | 9.53035178497522e-07 |
| SG4441     | TcCLB.506263.40   | 0.000101672000861757 |
| SG6890     | TcCLB.506529.595  | 0.000101927818954658 |
| SG2312     | TcCLB.507851.70   | 0.000110579098358016 |
| SG5555     | TcCLB.511277.140  | 0.000110579098358016 |
| SG8968     | TcCLB.509105.90   | 0.000113590758905792 |
| SG4884     | TcCLB.511283.124  | 0.00011506364505726  |
| SG7652     | TcCLB.510901.180  | 0.000134291183881425 |
| SG8088     | TcCLB.509437.170  | 0.000135953833172997 |
| SG2646     | TcCLB.507951.70   | 0.000138058783603592 |
| SG4422     | TcCLB.507305.40   | 0.000161022151420083 |
| SG6791     | TcCLB.506945.240  | 0.000161022151420083 |
| SG3684     | TcCLB.511151.54   | 0.000161471728872203 |
| SG4526     | TcCLB.504087.10   | 0.000180120535158395 |
| SG5235     | TcCLB.508799.150  | 0.000213112956137256 |

| Supra gene | Representative ID | FDR                  |
|------------|-------------------|----------------------|
| SG5890     | TcCLB.510045.20   | 0.000223469574679328 |
| SG3321     | TcCLB.509003.30   | 0.000223481280173487 |
| SG3859     | TcCLB.510397.10   | 0.000228363777285146 |
| SG4263     | TcCLB.509937.130  | 0.000228363777285146 |
| SG6027     | TcCLB.508543.120  | 0.000228363777285146 |
| SG6912     | TcCLB.507093.160  | 0.000245285551117438 |
| SG0632     | TcCLB.503571.19   | 0.000304621873706574 |
| SG1043     | TcCLB.509617.40   | 0.000307841251849156 |
| SG1919     | TcCLB.507143.60   | 0.000310332967547997 |
| SG2986     | TcCLB.506195.300  | 0.000310332967547997 |
| SG6398     | TcCLB.507003.50   | 0.000310332967547997 |
| SG7958     | TcCLB.503461.20   | 0.000310332967547997 |
| SG1370     | TcCLB.506195.90   | 0.00031672208174263  |
| SG2316     | TcCLB.506727.150  | 0.000323234481443093 |
| SG8398     | TcCLB.504071.110  | 0.000368052916249017 |
| SG3244     | TcCLB.509105.4    | 0.000380975987805373 |
| SG6982     | TcCLB.506925.190  | 0.000380975987805373 |
| SG8162     | TcCLB.506619.30   | 0.000380975987805373 |
| SG7886     | TcCLB.511725.170  | 0.000382543758950203 |
| SG1113     | TcCLB.503975.50   | 0.000392997421506699 |
| SG0351     | TcCLB.504797.140  | 0.000407220080139268 |
| SG0081     | TcCLB.504015.30   | 0.00040984211504992  |
| SG5648     | TcCLB.507143.80   | 0.00042375723332197  |
| SG1407     | TcCLB.510359.290  | 0.000430633428812675 |
| SG6749     | TcCLB.504117.50   | 0.000470844516899454 |
| SG2198     | TcCLB.503943.20   | 0.000472381413463858 |
| SG5232     | TcCLB.403875.10   | 0.000473276043662071 |
| SG6869     | TcCLB.510599.70   | 0.000489266256340875 |
| SG7597     | TcCLB.506625.230  | 0.000492481824290065 |
| SG8730     | TcCLB.509647.180  | 0.000499248690897103 |
| SG3633     | TcCLB.503559.70   | 0.000506790914315077 |
| SG0712     | TcCLB.506559.129  | 0.000508445172386109 |
| SG1615     | TcCLB.511761.10   | 0.000508445172386109 |
| SG6907     | TcCLB.510431.140  | 0.000535157305974853 |
| SG6867     | TcCLB.504153.260  | 0.000556799841894931 |
| SG5744     | TcCLB.511545.170  | 0.000576781608464952 |
| SG2025     | TcCLB.507515.90   | 0.000581491330789466 |
| SG6659     | TcCLB.511003.200  | 0.000581491330789466 |
| SG4789     | TcCLB.511289.90   | 0.00059472899877852  |
| SG5192     | TcCLB.508577.80   | 0.000598190593001404 |
| SG0846     | TcCLB.508065.70   | 0.000629515367148499 |
| SG2623     | TcCLB.506181.90   | 0.000629515367148499 |
| SG3001     | TcCLB.508257.70   | 0.000629515367148499 |
| SG1007     | TcCLB.508901.10   | 0.00065816728462526  |
| SG2985     | TcCLB.510149.140  | 0.00065816728462526  |
| SG5658     | TcCLB.509331.150  | 0.00065816728462526  |
| SG0251     | TcCLB.510581.9    | 0.000660461464549539 |
| SG2489     | TcCLB.509099.130  | 0.000676884600363304 |
| SG2849     | TcCLB.511759.40   | 0.000679449841650376 |
| SG6049     | TcCLB.511825.20   | 0.000679449841650376 |
| SG6498     | TcCLB.506925.390  | 0.000679449841650376 |
| SG3838     | TcCLB.507609.40   | 0.000683340767898757 |
| SG4690     | TcCLB.510421.310  | 0.000683340767898757 |

| Supra gene | Representative ID | FDR                  |
|------------|-------------------|----------------------|
| SG3895     | TeCLB.503823.120  | 0.000700823319095703 |
| SG3950     | TeCLB.503795.10   | 0.000700823319095703 |
| SG4955     | TeCLB.503411.10   | 0.00071898785900524  |
| SG1074     | TeCLB.511899.40   | 0.000764899004694868 |
| SG2363     | TeCLB.504137.50   | 0.000764899004694868 |
| SG6931     | TeCLB.510761.30   | 0.000794888322882786 |
| SG0763     | TeCLB.507715.10   | 0.000835094461867382 |
| SG6433     | TeCLB.507063.130  | 0.000852723929513126 |
| SG5721     | TeCLB.507031.90   | 0.000864101302188373 |
| SG5855     | TeCLB.507927.80   | 0.00088290969126587  |
| SG2347     | TeCLB.506195.290  | 0.000886244727163664 |
| SG4926     | TeCLB.503617.31   | 0.000912220045496489 |
| SG8686     | TeCLB.508863.10   | 0.000912220045496489 |
| SG1601     | TeCLB.504003.70   | 0.000995985388506219 |
| SG5432     | TeCLB.509859.30   | 0.00100597760956817  |
| SG8418     | TeCLB.507053.209  | 0.00101159822894001  |
| SG8657     | TeCLB.508479.300  | 0.00102969638219555  |
| SG2752     | TeCLB.506399.80   | 0.00104877946238568  |
| SG2422     | TeCLB.508593.130  | 0.00105139739036954  |
| SG3108     | TeCLB.507017.130  | 0.00105139739036954  |
| SG7448     | TeCLB.506411.25   | 0.001061666588424    |
| SG2257     | TeCLB.507049.100  | 0.00107342268365207  |
| SG7028     | TeCLB.509703.10   | 0.00107342268365207  |
| SG8691     | TeCLB.510087.100  | 0.00107342268365207  |
| SG8959     | TeCLB.510329.70   | 0.00107342268365207  |
| SG3061     | TeCLB.511807.64   | 0.00111225388396956  |
| SG4228     | TeCLB.510829.10   | 0.00111981880288002  |
| SG3396     | TeCLB.509599.120  | 0.00113884451801221  |
| SG2810     | TeCLB.508669.10   | 0.00114013476296358  |
| SG0380     | TeCLB.511757.70   | 0.0011951053927782   |
| SG3805     | TeCLB.509179.80   | 0.00121443536964682  |
| SG4548     | TeCLB.509237.50   | 0.00121443536964682  |
| SG5863     | TeCLB.506229.10   | 0.00121882645003125  |
| SG3542     | TeCLB.510001.10   | 0.00128499470362046  |
| SG3990     | TeCLB.511827.100  | 0.00128499470362046  |
| SG0145     | TeCLB.511911.90   | 0.00131027484604458  |
| SG4064     | TeCLB.510691.70   | 0.00131027484604458  |
| SG4079     | TeCLB.508175.39   | 0.00131027484604458  |
| SG4199     | TeCLB.510655.130  | 0.00131027484604458  |
| SG6440     | TeCLB.507089.30   | 0.00131027484604458  |
| SG3211     | TeCLB.505999.70   | 0.00131427489132381  |
| SG3583     | TeCLB.508461.40   | 0.00132614337651378  |
| SG2117     | TeCLB.509563.10   | 0.00134676359161995  |
| SG5864     | TeCLB.503571.10   | 0.00134676359161995  |
| SG3179     | TeCLB.506491.10   | 0.00135110762489021  |
| SG5583     | TeCLB.507007.45   | 0.00135142948092339  |
| SG2135     | TeCLB.511269.50   | 0.00136526416404062  |
| SG6698     | TeCLB.507251.10   | 0.00136526416404062  |
| SG0690     | TeCLB.506375.100  | 0.00138589254824425  |
| SG5486     | TeCLB.511411.16   | 0.00140552050618104  |
| SG5963     | TeCLB.503939.20   | 0.00140552050618104  |
| SG8580     | TeCLB.508799.10   | 0.00140552050618104  |
| SG3302     | TeCLB.511151.20   | 0.00143522400729334  |

| Supra gene | Representative ID | FDR                 |
|------------|-------------------|---------------------|
| SG7979     | TcCLB.510901.30   | 0.00145861624050855 |
| SG3449     | TcCLB.510861.70   | 0.00149620077214839 |
| SG7307     | TcCLB.504149.100  | 0.00149620077214839 |
| SG1791     | TcCLB.508177.100  | 0.00150752641829854 |
| SG7726     | TcCLB.510977.9    | 0.00154399355009667 |
| SG7329     | TcCLB.504147.110  | 0.00167566040883814 |
| SG8191     | TcCLB.511003.90   | 0.00168814279711866 |
| SG8224     | TcCLB.511367.210  | 0.00168814279711866 |
| SG1533     | TcCLB.509001.20   | 0.00178497171995446 |
| SG7098     | TcCLB.506925.10   | 0.00189236242001312 |
| SG6906     | TcCLB.505073.10   | 0.00195402573417577 |
| SG5557     | TcCLB.510421.270  | 0.00203892891281979 |
| SG3292     | TcCLB.511239.110  | 0.00205551629178188 |
| SG5111     | TcCLB.402863.9    | 0.00207182922289675 |
| SG0364     | TcCLB.511253.31   | 0.0020866507245293  |
| SG2622     | TcCLB.506257.70   | 0.00209097074047476 |
| SG6303     | TcCLB.510357.90   | 0.00209097074047476 |
| SG0747     | TcCLB.511303.40   | 0.00210842058465221 |
| SG1858     | TcCLB.509799.50   | 0.00213181406093882 |
| SG4757     | TcCLB.511761.60   | 0.00229987368477298 |
| SG6274     | TcCLB.511153.70   | 0.00229987368477298 |
| SG6862     | TcCLB.482097.20   | 0.00229987368477298 |
| SG7589     | TcCLB.503975.40   | 0.00243626162940998 |
| SG8052     | TcCLB.506679.80   | 0.00243626162940998 |
| SG5882     | TcCLB.511285.30   | 0.00244313507344728 |
| SG5696     | TcCLB.506265.110  | 0.00257436016978057 |
| SG2077     | TcCLB.511649.94   | 0.00259909866825824 |
| SG1748     | TcCLB.511907.30   | 0.00262212927890131 |
| SG6217     | TcCLB.503955.100  | 0.00262783537509038 |
| SG4179     | TcCLB.509791.60   | 0.00262968613915595 |
| SG5075     | TcCLB.504161.50   | 0.00263774790630674 |
| SG1758     | TcCLB.504149.175  | 0.00263938948462161 |
| SG2525     | TcCLB.506573.50   | 0.00270668301659663 |
| SG4321     | TcCLB.511529.160  | 0.00290257101879438 |
| SG4038     | TcCLB.507853.10   | 0.00299039787980622 |
| SG8275     | TcCLB.510901.230  | 0.00299039787980622 |
| SG0306     | TcCLB.506201.70   | 0.00300285189152815 |
| SG8813     | TcCLB.511019.80   | 0.00300285189152815 |
| SG8020     | TcCLB.510129.20   | 0.00303118861763846 |
| SG8724     | TcCLB.506679.20   | 0.00303118861763846 |
| SG4987     | TcCLB.511209.60   | 0.00305218332927078 |
| SG2247     | TcCLB.503735.40   | 0.00310809849304033 |
| SG1386     | TcCLB.506959.70   | 0.00313293605407417 |
| SG5193     | TcCLB.511017.25   | 0.00313293605407417 |
| SG6470     | TcCLB.509775.9    | 0.00313944940309094 |
| SG4144     | TcCLB.503415.40   | 0.00317485084792937 |
| SG3489     | TcCLB.506303.60   | 0.00317696406068103 |
| SG1397     | TcCLB.511509.30   | 0.00330577536392677 |
| SG2176     | TcCLB.509053.70   | 0.00330577536392677 |
| SG3523     | TcCLB.509109.30   | 0.00330577536392677 |
| SG5403     | TcCLB.508707.10   | 0.00339307863026164 |
| SG5578     | TcCLB.506025.40   | 0.00340906796932007 |
| SG2862     | TcCLB.508231.190  | 0.00341395413333401 |

| Supra gene | Representative ID | FDR                 |
|------------|-------------------|---------------------|
| SG3084     | TcCLB.511529.50   | 0.00341395413333401 |
| SG3002     | TcCLB.505171.60   | 0.00342442890868981 |
| SG0796     | TcCLB.510609.30   | 0.00344626647607006 |
| SG3681     | TcCLB.503703.30   | 0.00344626647607006 |
| SG5496     | TcCLB.509453.20   | 0.00344626647607006 |
| SG6564     | TcCLB.511323.60   | 0.00344626647607006 |
| SG7393     | TcCLB.504423.15   | 0.00344626647607006 |
| SG8474     | TcCLB.504071.60   | 0.00344626647607006 |
| SG6948     | TcCLB.509007.50   | 0.00345761091321588 |
| SG3333     | TcCLB.507057.30   | 0.00348844360286932 |
| SG8007     | TcCLB.507681.200  | 0.00348844360286932 |
| SG1165     | TcCLB.506825.70   | 0.00350829383886074 |
| SG5441     | TcCLB.506305.29   | 0.00351846473178718 |
| SG1082     | TcCLB.509835.10   | 0.00355016199622606 |
| SG0708     | TcCLB.507009.30   | 0.00356090393417438 |
| SG0452     | TcCLB.503731.9    | 0.00361760725380546 |
| SG2023     | TcCLB.507895.140  | 0.00361760725380546 |
| SG2917     | TcCLB.508593.30   | 0.00361760725380546 |
| SG5024     | TcCLB.508577.130  | 0.00361760725380546 |
| SG5655     | TcCLB.508231.60   | 0.00361760725380546 |
| SG6190     | TcCLB.511211.210  | 0.00361760725380546 |
| SG3564     | TcCLB.509029.80   | 0.00370755800507088 |
| SG6294     | TcCLB.503599.10   | 0.00370755800507088 |
| SG8391     | TcCLB.506419.10   | 0.00371243627104671 |
| SG2991     | TcCLB.508269.40   | 0.00372924166743087 |
| SG4394     | TcCLB.511181.80   | 0.00372924166743087 |
| SG0942     | TcCLB.506743.4    | 0.00375449342500165 |
| SG2868     | TcCLB.510575.20   | 0.00375449342500165 |
| SG3285     | TcCLB.509003.40   | 0.00375449342500165 |
| SG4059     | TcCLB.504021.74   | 0.00375449342500165 |
| SG4537     | TcCLB.507017.40   | 0.00376078714623584 |
| SG5520     | TcCLB.507491.70   | 0.00378359319334705 |
| SG5589     | TcCLB.508409.199  | 0.00378359319334705 |
| SG4035     | TcCLB.504167.40   | 0.00380011482675013 |
| SG4938     | TcCLB.503431.90   | 0.00392026441719965 |
| SG0392     | TcCLB.509237.120  | 0.00402670431966592 |
| SG1057     | TcCLB.510007.50   | 0.00404631553185593 |
| SG0281     | TcCLB.509639.10   | 0.0041274648723236  |
| SG7293     | TcCLB.507641.140  | 0.00421310824213705 |
| SG1634     | TcCLB.506727.140  | 0.00429973446848572 |
| SG2527     | TcCLB.508661.70   | 0.00429973446848572 |
| SG6243     | TcCLB.507793.20   | 0.00429973446848572 |
| SG6406     | TcCLB.508153.520  | 0.00429973446848572 |
| SG7738     | TcCLB.511807.150  | 0.00429973446848572 |
| SG8545     | TcCLB.510187.400  | 0.00429973446848572 |
| SG5016     | TcCLB.509769.30   | 0.00436128248894577 |
| SG3320     | TcCLB.511355.30   | 0.00436920431227058 |
| SG6160     | TcCLB.510155.50   | 0.00440396326393541 |
| SG1708     | TcCLB.506477.60   | 0.00443723595829411 |
| SG0620     | TcCLB.509999.120  | 0.00447911210317561 |
| SG6090     | TcCLB.509229.10   | 0.00447911210317561 |
| SG8739     | TcCLB.506559.550  | 0.00449938180613716 |
| SG0879     | TcCLB.503531.40   | 0.004543544764048   |

| Supra gene | Representative ID | FDR                 |
|------------|-------------------|---------------------|
| SG5345     | TcCLB.507317.20   | 0.00454726079444184 |
| SG2519     | TcCLB.508905.30   | 0.00457678322383681 |
| SG2856     | TcCLB.503521.60   | 0.00458827340610748 |
| SG2704     | TcCLB.509499.4    | 0.00464372664273476 |
| SG2649     | TcCLB.511353.69   | 0.0046856549590999  |
| SG7368     | TcCLB.503651.49   | 0.0046856549590999  |
| SG6381     | TcCLB.506841.20   | 0.00472764776012277 |
| SG8822     | TcCLB.511727.210  | 0.00477623418713767 |
| SG4070     | TcCLB.510823.30   | 0.0048180303059662  |
| SG7049     | TcCLB.511421.170  | 0.0048180303059662  |
| SG2367     | TcCLB.503595.10   | 0.00482035920650713 |
| SG3667     | TcCLB.504253.40   | 0.00486699997309501 |
| SG4165     | TcCLB.510335.10   | 0.00486699997309501 |
| SG3464     | TcCLB.506963.70   | 0.00487451970521112 |
| SG3615     | TcCLB.510219.30   | 0.00491038578278744 |
| SG7739     | TcCLB.511807.130  | 0.00491038578278744 |
| SG3486     | TcCLB.509671.160  | 0.00498452426253193 |
| SG2451     | TcCLB.503409.10   | 0.00511352273572552 |
| SG6307     | TcCLB.506229.64   | 0.00515869136385917 |
| SG2767     | TcCLB.507251.20   | 0.00516471315591967 |
| SG2373     | TcCLB.508355.114  | 0.00523261891585617 |
| SG1789     | TcCLB.509551.70   | 0.00527207689958938 |
| SG8015     | TcCLB.508461.240  | 0.00527225355080294 |
| SG6070     | TcCLB.506821.90   | 0.00533805947436663 |
| SG8335     | TcCLB.511317.70   | 0.00536886559398458 |
| SG3647     | TcCLB.506475.90   | 0.00536983874027681 |
| SG4906     | TcCLB.509463.10   | 0.00536983874027681 |
| SG8934     | TcCLB.506317.10   | 0.00536983874027681 |
| SG7928     | TcCLB.506627.100  | 0.00546025811794429 |
| SG1197     | TcCLB.507485.100  | 0.00546340300263475 |
| SG1942     | TcCLB.508153.260  | 0.00546340300263475 |
| SG4651     | TcCLB.507011.110  | 0.00546340300263475 |
| SG7457     | TcCLB.511439.70   | 0.00546340300263475 |
| SG2642     | TcCLB.506773.90   | 0.00548741789367537 |
| SG8613     | TcCLB.510303.200  | 0.00552092914656812 |
| SG1008     | TcCLB.509237.90   | 0.00564652382472502 |
| SG5155     | TcCLB.509683.80   | 0.00564652382472502 |
| SG1575     | TcCLB.508999.260  | 0.00569691390223995 |
| SG8942     | TcCLB.511511.5    | 0.00570628737701781 |
| SG6530     | TcCLB.506297.140  | 0.00574497811031863 |
| SG3410     | TcCLB.511025.80   | 0.00582334129907528 |
| SG3284     | TcCLB.507031.140  | 0.0058564307130863  |
| SG5943     | TcCLB.511653.20   | 0.0058564307130863  |
| SG7223     | TcCLB.441241.10   | 0.00587379433919448 |
| SG0847     | TcCLB.508823.10   | 0.00589440635745039 |
| SG8847     | TcCLB.511885.50   | 0.00594906865993843 |
| SG3326     | TcCLB.509717.34   | 0.00598437964706945 |
| SG6961     | TcCLB.511867.130  | 0.00610263070350341 |
| SG3519     | TcCLB.509055.44   | 0.00619690735378892 |
| SG2229     | TcCLB.510039.64   | 0.00655217339275243 |
| SG2418     | TcCLB.503999.100  | 0.00655217339275243 |
| SG3689     | TcCLB.509879.40   | 0.00655217339275243 |
| SG3816     | TcCLB.508741.340  | 0.00655217339275243 |

| Supra gene | Representative ID | FDR                 |
|------------|-------------------|---------------------|
| SG2923     | TcCLB.508257.30   | 0.00660771272760154 |
| SG3742     | TcCLB.506529.30   | 0.00660771272760154 |
| SG4452     | TcCLB.506009.40   | 0.00660771272760154 |
| SG5407     | TcCLB.510657.20   | 0.00660771272760154 |
| SG8516     | TcCLB.510687.70   | 0.00660771272760154 |
| SG2714     | TcCLB.508409.160  | 0.00663993813554334 |
| SG8306     | TcCLB.508707.200  | 0.0066974009714628  |
| SG0493     | TcCLB.510663.19   | 0.0067228717758863  |
| SG5213     | TcCLB.509715.40   | 0.0067228717758863  |
| SG6029     | TcCLB.503715.40   | 0.00677829204627201 |
| SG3882     | TcCLB.506821.110  | 0.00678183670546501 |
| SG7302     | TcCLB.504147.240  | 0.00686303137773293 |
| SG6492     | TcCLB.511165.40   | 0.00695205941199676 |
| SG6404     | TcCLB.511903.90   | 0.00711866369099257 |
| SG4150     | TcCLB.510311.30   | 0.00720213138605702 |
| SG0244     | TcCLB.506989.300  | 0.00740393674166389 |
| SG4168     | TcCLB.504243.40   | 0.00740393674166389 |
| SG2627     | TcCLB.511127.180  | 0.00741941915162528 |
| SG5284     | TcCLB.506195.100  | 0.0075227803954942  |
| SG6579     | TcCLB.508211.50   | 0.00761922602863903 |
| SG7815     | TcCLB.508971.30   | 0.00763718781099131 |
| SG4638     | TcCLB.510659.270  | 0.00766333640761551 |
| SG1099     | TcCLB.506405.140  | 0.0076812936898448  |
| SG1983     | TcCLB.510655.80   | 0.0076812936898448  |
| SG2873     | TcCLB.509109.140  | 0.0076812936898448  |
| SG3141     | TcCLB.510039.80   | 0.0076812936898448  |
| SG4556     | TcCLB.506777.20   | 0.0076812936898448  |
| SG5730     | TcCLB.511249.110  | 0.0076812936898448  |
| SG7195     | TcCLB.504147.190  | 0.0076812936898448  |
| SG8943     | TcCLB.509907.60   | 0.0076812936898448  |
| SG2786     | TcCLB.503975.70   | 0.00775486849239432 |
| SG2926     | TcCLB.511649.100  | 0.00775486849239432 |
| SG5604     | TcCLB.511459.50   | 0.00775486849239432 |
| SG4182     | TcCLB.509499.10   | 0.00785027052785386 |
| SG7173     | TcCLB.503955.80   | 0.00785485797506339 |
| SG5852     | TcCLB.507677.150  | 0.00786675396086237 |
| SG1334     | TcCLB.509065.100  | 0.00787988997493156 |
| SG1141     | TcCLB.506811.50   | 0.00788706910678386 |
| SG2181     | TcCLB.424123.40   | 0.00788706910678386 |
| SG2930     | TcCLB.511481.70   | 0.00788706910678386 |
| SG3272     | TcCLB.510797.20   | 0.00788706910678386 |
| SG3979     | TcCLB.510339.90   | 0.00788706910678386 |
| SG7827     | TcCLB.506679.70   | 0.00788706910678386 |
| SG8480     | TcCLB.510329.210  | 0.00788706910678386 |
| SG2699     | TcCLB.506355.130  | 0.00789532396830965 |
| SG0393     | TcCLB.504075.10   | 0.00793215870001828 |
| SG2277     | TcCLB.511907.240  | 0.00797445127293252 |
| SG5274     | TcCLB.506775.180  | 0.0080088175459311  |
| SG8323     | TcCLB.503413.4    | 0.00801198908401736 |
| SG4172     | TcCLB.506327.80   | 0.00804329230253054 |
| SG6911     | TcCLB.508307.170  | 0.00805238002521131 |
| SG1755     | TcCLB.511903.45   | 0.00810199213188633 |
| SG2453     | TcCLB.504001.20   | 0.00810199213188633 |



| Supra gene | Representative ID | FDR                 |
|------------|-------------------|---------------------|
| SG3124     | TcCLB.506681.40   | 0.00810199213188633 |
| SG5015     | TcCLB.510691.10   | 0.00810199213188633 |
| SG6900     | TcCLB.511545.80   | 0.00810199213188633 |
| SG8206     | TcCLB.511295.20   | 0.00824112055168625 |
| SG0357     | TcCLB.510603.100  | 0.00833578384634853 |
| SG1155     | TcCLB.506201.110  | 0.00833578384634853 |
| SG2349     | TcCLB.508405.90   | 0.00833578384634853 |
| SG0823     | TcCLB.506629.220  | 0.00835542271103017 |
| SG5915     | TcCLB.503975.100  | 0.00835542271103017 |
| SG7593     | TcCLB.508687.25   | 0.00835542271103017 |
| SG7642     | TcCLB.506977.60   | 0.00835542271103017 |
| SG5508     | TcCLB.504111.10   | 0.00842424498746108 |
| SG7710     | TcCLB.511389.80   | 0.00846133022324831 |
| SG7760     | TcCLB.506791.20   | 0.00850082120050536 |
| SG3879     | TcCLB.511759.30   | 0.00850573577271567 |
| SG5714     | TcCLB.506123.24   | 0.00850573577271567 |
| SG6242     | TcCLB.506503.60   | 0.00850573577271567 |
| SG5154     | TcCLB.511847.50   | 0.00857347711246439 |
| SG6743     | TcCLB.509137.10   | 0.00863448732778556 |
| SG2325     | TcCLB.509539.44   | 0.00864042054893699 |
| SG5063     | TcCLB.511165.80   | 0.00864042054893699 |
| SG7626     | TcCLB.503419.50   | 0.00864042054893699 |
| SG8124     | TcCLB.511003.160  | 0.00864042054893699 |
| SG2392     | TcCLB.507081.110  | 0.00865451883510225 |
| SG4814     | TcCLB.506821.80   | 0.00867177106749544 |
| SG7394     | TcCLB.507099.30   | 0.00867177106749544 |
| SG6230     | TcCLB.510729.140  | 0.00881981434523794 |
| SG3926     | TcCLB.427789.20   | 0.00889792347581794 |
| SG2097     | TcCLB.503939.50   | 0.00899491825924898 |
| SG3947     | TcCLB.507031.29   | 0.00899491825924898 |
| SG6439     | TcCLB.508273.70   | 0.00899491825924898 |
| SG6759     | TcCLB.503955.89   | 0.0091541484749842  |
| SG2226     | TcCLB.504125.100  | 0.00917776227726235 |
| SG3064     | TcCLB.509791.90   | 0.00917776227726235 |
| SG8890     | TcCLB.508871.140  | 0.00918562865425542 |
| SG3934     | TcCLB.506825.10   | 0.00924608094552624 |
| SG3827     | TcCLB.507049.20   | 0.00925775677486853 |
| SG5789     | TcCLB.467287.10   | 0.00927169020334931 |
| SG6254     | TcCLB.504021.20   | 0.00931726458400247 |
| SG0441     | TcCLB.505999.10   | 0.00932115937923609 |
| SG5717     | TcCLB.505997.200  | 0.00938443433138375 |
| SG5211     | TcCLB.510257.24   | 0.00939628381242698 |
| SG0084     | TcCLB.506551.10   | 0.00940376110785879 |
| SG0304     | TcCLB.506469.80   | 0.00940376110785879 |
| SG5064     | TcCLB.508207.250  | 0.00940376110785879 |
| SG6920     | TcCLB.509013.10   | 0.00940376110785879 |
| SG8458     | TcCLB.508613.10   | 0.00940376110785879 |
| SG8326     | TcCLB.511727.230  | 0.00940452794773178 |
| SG3475     | TcCLB.509023.90   | 0.00944821628048972 |
| SG4659     | TcCLB.509537.50   | 0.00944821628048972 |
| SG2977     | TcCLB.506221.120  | 0.00955785519169339 |
| SG7754     | TcCLB.508479.310  | 0.00955785519169339 |
| SG4524     | TcCLB.506503.4    | 0.00958840647473622 |

| Supra gene | Representative ID | FDR                 |
|------------|-------------------|---------------------|
| SG0560     | TcCLB.504255.30   | 0.00959541842777066 |
| SG7901     | TcCLB.511909.30   | 0.00959541842777066 |
| SG8143     | TcCLB.511807.125  | 0.00959541842777066 |
| SG1480     | TcCLB.508501.190  | 0.00964511849140425 |
| SG7153     | TcCLB.510859.17   | 0.0097836721664474  |
| SG1238     | TcCLB.511727.14   | 0.00980177685880037 |
| SG3440     | TcCLB.510445.50   | 0.00980177685880037 |
| SG5374     | TcCLB.506735.40   | 0.00980177685880037 |
| SG0533     | TcCLB.506107.10   | 0.00992593808996145 |
| SG2224     | TcCLB.510943.30   | 0.00992593808996145 |
| SG2313     | TcCLB.504003.30   | 0.00992593808996145 |
| SG4260     | TcCLB.505983.20   | 0.00992593808996145 |
| SG4574     | TcCLB.509599.60   | 0.00992593808996145 |
| SG4928     | TcCLB.508593.40   | 0.00992593808996145 |
| SG5106     | TcCLB.506989.10   | 0.00992593808996145 |
| SG6557     | TcCLB.508277.340  | 0.00992593808996145 |
| SG7270     | TcCLB.506227.150  | 0.00992593808996145 |
| SG7283     | TcCLB.506289.80   | 0.00992593808996145 |
| SG6057     | TcCLB.509695.50   | 0.00994909847645916 |
| SG7853     | TcCLB.510901.170  | 0.0101142958225081  |
| SG1116     | TcCLB.510611.50   | 0.010128008393029   |
| SG7914     | TcCLB.508547.50   | 0.0101312032801908  |
| SG3584     | TcCLB.509605.30   | 0.0102587022436057  |
| SG6408     | TcCLB.507081.130  | 0.010274169157903   |
| SG3587     | TcCLB.510941.6    | 0.0102829308351337  |
| SG8951     | TcCLB.511727.280  | 0.0102896688087133  |
| SG2169     | TcCLB.507049.60   | 0.010292051130007   |
| SG2564     | TcCLB.509171.47   | 0.0103091564192627  |
| SG0325     | TcCLB.508997.20   | 0.0103712677535444  |
| SG7702     | TcCLB.506855.240  | 0.010458768709311   |
| SG4241     | TcCLB.506989.50   | 0.0105073443334353  |
| SG3420     | TcCLB.511425.40   | 0.0105507663581782  |
| SG0327     | TcCLB.511385.110  | 0.0106382396735277  |
| SG1705     | TcCLB.510689.80   | 0.0106382396735277  |
| SG1835     | TcCLB.507583.20   | 0.0106382396735277  |
| SG3011     | TcCLB.504085.20   | 0.0106382396735277  |
| SG7411     | TcCLB.430895.16   | 0.0106382396735277  |
| SG8097     | TcCLB.508533.50   | 0.0106382396735277  |
| SG0027     | TcCLB.510361.120  | 0.0106522072206791  |
| SG2217     | TcCLB.511751.30   | 0.0107098772678315  |
| SG2038     | TcCLB.506425.80   | 0.0108377072992836  |
| SG8596     | TcCLB.511809.90   | 0.0108510850320435  |
| SG6024     | TcCLB.507515.60   | 0.0108812571094058  |
| SG5397     | TcCLB.509105.80   | 0.0109765768080001  |
| SG1804     | TcCLB.510967.10   | 0.0111552091423069  |
| SG4481     | TcCLB.507001.110  | 0.0112811517820275  |
| SG4454     | TcCLB.506573.70   | 0.0116072118976117  |
| SG6364     | TcCLB.507031.170  | 0.0116072118976117  |
| SG0200     | TcCLB.510187.420  | 0.0116366245032766  |
| SG2306     | TcCLB.509901.100  | 0.0116366245032766  |
| SG7846     | TcCLB.508461.270  | 0.0116366245032766  |
| SG8765     | TcCLB.506679.120  | 0.0116366245032766  |
| SG4950     | TcCLB.508445.90   | 0.0116480791096686  |

| Supra gene | Representative ID | FDR                |
|------------|-------------------|--------------------|
| SG7297     | TcCLB.506625.200  | 0.0118188351429669 |
| SG0466     | TcCLB.509065.60   | 0.0120827401781295 |
| SG3606     | TcCLB.509733.90   | 0.0120949851042789 |
| SG2072     | TcCLB.503945.20   | 0.0122825768128692 |
| SG6937     | TcCLB.445635.10   | 0.0123683758818686 |
| SG0175     | TcCLB.511301.80   | 0.0123694790994672 |
| SG1673     | TcCLB.506201.39   | 0.0123694790994672 |
| SG1111     | TcCLB.509213.10   | 0.0124671717929523 |
| SG3766     | TcCLB.508879.30   | 0.0124832235492626 |
| SG4602     | TcCLB.511165.100  | 0.0124832235492626 |
| SG8157     | TcCLB.511667.40   | 0.0124832235492626 |
| SG5329     | TcCLB.510729.210  | 0.0125220237651984 |
| SG6926     | TcCLB.508347.90   | 0.0125220237651984 |
| SG1385     | TcCLB.509693.110  | 0.0125261779575383 |
| SG4292     | TcCLB.508737.70   | 0.012583853669876  |
| SG5748     | TcCLB.508543.60   | 0.012583853669876  |
| SG1697     | TcCLB.506839.10   | 0.0126715972889974 |
| SG0311     | TcCLB.509599.130  | 0.0127135074979863 |
| SG3518     | TcCLB.511511.150  | 0.012782412587204  |
| SG2015     | TcCLB.507241.30   | 0.0128518018130285 |
| SG7990     | TcCLB.507949.250  | 0.0128518018130285 |
| SG2267     | TcCLB.506835.40   | 0.0128759258457191 |
| SG3266     | TcCLB.510665.30   | 0.0128759258457191 |
| SG0912     | TcCLB.510661.250  | 0.0129710038793499 |
| SG4688     | TcCLB.510421.200  | 0.0129720068555007 |
| SG7516     | TcCLB.506625.70   | 0.0130465682852214 |
| SG2239     | TcCLB.511805.20   | 0.0131622317042056 |
| SG4385     | TcCLB.508891.30   | 0.0132245275413189 |
| SG5182     | TcCLB.509179.200  | 0.0132245275413189 |
| SG2002     | TcCLB.503879.110  | 0.0132799261450252 |
| SG0995     | TcCLB.503893.150  | 0.0132859677671699 |
| SG5972     | TcCLB.510121.40   | 0.0132859677671699 |
| SG8808     | TcCLB.508689.30   | 0.0132859677671699 |
| SG8829     | TcCLB.507007.76   | 0.0132859677671699 |
| SG1118     | TcCLB.508815.179  | 0.0133443647215021 |
| SG3324     | TcCLB.506743.180  | 0.013432736856035  |
| SG4647     | TcCLB.508409.280  | 0.0134416517335945 |
| SG3618     | TcCLB.507911.50   | 0.0136094419279842 |
| SG0431     | TcCLB.508719.9    | 0.0137631121762468 |
| SG1913     | TcCLB.508889.19   | 0.0138142091579154 |
| SG6665     | TcCLB.510949.10   | 0.0138574361924092 |
| SG0997     | TcCLB.509803.40   | 0.0140766184530029 |
| SG4871     | TcCLB.509875.170  | 0.0142214577211596 |
| SG5448     | TcCLB.507951.150  | 0.0142214577211596 |
| SG8644     | TcCLB.507583.40   | 0.0142214577211596 |
| SG6603     | TcCLB.507991.123  | 0.0142305394389563 |
| SG0196     | TcCLB.506243.135  | 0.0142751881020953 |
| SG4841     | TcCLB.506257.60   | 0.0142751881020953 |
| SG7216     | TcCLB.510565.130  | 0.0142751881020953 |
| SG0245     | TcCLB.511657.20   | 0.0143434447662546 |
| SG1780     | TcCLB.506401.280  | 0.0143434447662546 |
| SG6970     | TcCLB.504153.240  | 0.0143899905381315 |
| SG3943     | TcCLB.510155.94   | 0.0144394683674219 |

| Supra gene | Representative ID | FDR                |
|------------|-------------------|--------------------|
| SG6151     | TcCLB.511621.60   | 0.0144394683674219 |
| SG1107     | TcCLB.506605.170  | 0.0144706425027424 |
| SG1711     | TcCLB.509991.9    | 0.0145153098767824 |
| SG3070     | TcCLB.509937.170  | 0.0145153098767824 |
| SG3931     | TcCLB.510729.60   | 0.0145153098767824 |
| SG6152     | TcCLB.510305.70   | 0.0145153098767824 |
| SG2491     | TcCLB.508175.320  | 0.0146322219991245 |
| SG3759     | TcCLB.511755.100  | 0.0146322219991245 |
| SG6779     | TcCLB.433273.10   | 0.0146695805774787 |
| SG5560     | TcCLB.510299.20   | 0.0146777372141647 |
| SG3928     | TcCLB.511725.40   | 0.0146831631803098 |
| SG8239     | TcCLB.508479.274  | 0.0146831631803098 |
| SG1444     | TcCLB.503697.40   | 0.0147659964563634 |
| SG7179     | TcCLB.504147.250  | 0.0147659964563634 |
| SG0993     | TcCLB.507395.10   | 0.0147843296827369 |
| SG1330     | TcCLB.511583.10   | 0.0147843296827369 |
| SG5322     | TcCLB.510661.120  | 0.0147843296827369 |
| SG3944     | TcCLB.511417.70   | 0.0148352558537491 |
| SG1606     | TcCLB.503529.30   | 0.014852008921546  |
| SG0471     | TcCLB.507673.20   | 0.0148824490982396 |
| SG5096     | TcCLB.508823.20   | 0.0148824490982396 |
| SG5588     | TcCLB.503879.50   | 0.01490787676356   |
| SG8154     | TcCLB.505183.120  | 0.0149548582821253 |
| SG4695     | TcCLB.511431.54   | 0.0150708308142307 |
| SG6236     | TcCLB.510337.20   | 0.0152574198814541 |
| SG0268     | TcCLB.509239.10   | 0.0153056232983115 |
| SG4848     | TcCLB.503791.20   | 0.0153393692869085 |
| SG6852     | TcCLB.511867.110  | 0.0153393692869085 |
| SG2515     | TcCLB.505977.13   | 0.0153833275677075 |
| SG0777     | TcCLB.509399.90   | 0.0153846256052756 |
| SG2924     | TcCLB.510409.20   | 0.0153846256052756 |
| SG5834     | TcCLB.511903.270  | 0.0153846256052756 |
| SG4359     | TcCLB.511389.114  | 0.0154430373994113 |
| SG8401     | TcCLB.511725.134  | 0.0154725957645028 |
| SG2764     | TcCLB.506743.190  | 0.0155749312590401 |
| SG5305     | TcCLB.508857.130  | 0.0158541780022845 |
| SG4472     | TcCLB.508821.30   | 0.0158758745692938 |
| SG7102     | TcCLB.503865.60   | 0.0158758745692938 |
| SG4962     | TcCLB.507951.170  | 0.015877786411932  |
| SG1557     | TcCLB.506679.270  | 0.0158874363926506 |
| SG3393     | TcCLB.511635.30   | 0.0158874363926506 |
| SG3834     | TcCLB.511039.6    | 0.0158874363926506 |
| SG4138     | TcCLB.509611.110  | 0.0159269330975473 |
| SG0217     | TcCLB.511873.5    | 0.0159636264597496 |
| SG5843     | TcCLB.504557.10   | 0.0160850541878601 |
| SG6290     | TcCLB.506621.30   | 0.0160850541878601 |
| SG2452     | TcCLB.511291.50   | 0.016103861020125  |
| SG7291     | TcCLB.510101.34   | 0.0161583538223625 |
| SG8723     | TcCLB.508667.40   | 0.0161583538223625 |
| SG5927     | TcCLB.510575.210  | 0.0166054820381234 |
| SG8966     | TcCLB.510187.100  | 0.0166484119166549 |
| SG7854     | TcCLB.510329.160  | 0.0166951487422914 |
| SG7865     | TcCLB.506301.30   | 0.0166951487422914 |

| Supra gene | Representative ID | FDR                |
|------------|-------------------|--------------------|
| SG8386     | TcCLB.510689.30   | 0.0166951487422914 |
| SG0092     | TcCLB.506721.30   | 0.0167622414592041 |
| SG5973     | TcCLB.510125.10   | 0.016828293525966  |
| SG3621     | TcCLB.511629.30   | 0.0168467476154844 |
| SG2083     | TcCLB.508707.80   | 0.0168530788037488 |
| SG8515     | TcCLB.508355.190  | 0.0168530788037488 |
| SG1766     | TcCLB.510105.20   | 0.0168743323668557 |
| SG2055     | TcCLB.507649.40   | 0.016944722798992  |
| SG7980     | TcCLB.507889.20   | 0.0170212462287199 |
| SG7357     | TcCLB.506529.480  | 0.0170585042490614 |
| SG0488     | TcCLB.508153.970  | 0.0170599889897517 |
| SG2844     | TcCLB.510889.340  | 0.0170879327701814 |
| SG4308     | TcCLB.507913.20   | 0.0171022976523051 |
| SG4515     | TcCLB.510729.110  | 0.0171022976523051 |
| SG5629     | TcCLB.510755.19   | 0.0171022976523051 |
| SG2477     | TcCLB.511529.68   | 0.0172234443884698 |
| SG4455     | TcCLB.507737.20   | 0.0172363344701324 |
| SG5619     | TcCLB.508965.70   | 0.0172363344701324 |
| SG7413     | TcCLB.511215.14   | 0.0172363344701324 |
| SG8309     | TcCLB.510943.20   | 0.0172363344701324 |
| SG6118     | TcCLB.511545.90   | 0.017260373884543  |
| SG4216     | TcCLB.510967.20   | 0.0173909662598554 |
| SG6586     | TcCLB.508593.140  | 0.0174802560938552 |
| SG5368     | TcCLB.508507.40   | 0.0174821388597194 |
| SG0051     | TcCLB.511681.20   | 0.01748931038662   |
| SG1257     | TcCLB.504949.30   | 0.01748931038662   |
| SG2526     | TcCLB.506573.34   | 0.01748931038662   |
| SG5196     | TcCLB.510667.10   | 0.01748931038662   |
| SG1265     | TcCLB.510889.330  | 0.0174893798169804 |
| SG5841     | TcCLB.509683.10   | 0.0174901710759168 |
| SG4907     | TcCLB.507897.10   | 0.017520559731011  |
| SG7460     | TcCLB.511313.30   | 0.0176311943090086 |
| SG7640     | TcCLB.507681.100  | 0.0176311943090086 |
| SG0603     | TcCLB.509647.190  | 0.0176744120075375 |
| SG7093     | TcCLB.509979.30   | 0.0177567706673881 |
| SG3468     | TcCLB.511293.90   | 0.0178222545839119 |
| SG7825     | TcCLB.506263.30   | 0.0178222545839119 |
| SG8759     | TcCLB.507063.10   | 0.0178222545839119 |
| SG0418     | TcCLB.511557.50   | 0.0178622520598737 |
| SG6124     | TcCLB.509747.80   | 0.0178985018271047 |
| SG2305     | TcCLB.509207.80   | 0.0179703137645746 |
| SG2910     | TcCLB.507963.10   | 0.0180305505010604 |
| SG4713     | TcCLB.507711.90   | 0.0180305505010604 |
| SG6322     | TcCLB.507993.230  | 0.0180305505010604 |
| SG6989     | TcCLB.506885.90   | 0.0180873313280849 |
| SG6612     | TcCLB.508543.90   | 0.0181934397181789 |
| SG1037     | TcCLB.508981.39   | 0.0182267373689482 |
| SG2922     | TcCLB.506705.60   | 0.0184548626122932 |
| SG6075     | TcCLB.510663.40   | 0.0184599510428511 |
| SG8395     | TcCLB.508257.120  | 0.0185198038755787 |
| SG1682     | TcCLB.506465.40   | 0.0187468604477543 |
| SG8911     | TcCLB.509061.10   | 0.0190445398129576 |
| SG8081     | TcCLB.508153.184  | 0.0191395703748414 |

| Supra gene | Representative ID | FDR                |
|------------|-------------------|--------------------|
| SG6481     | TcCLB.511385.60   | 0.0191560520315481 |
| SG1167     | TcCLB.511895.40   | 0.0193078986754515 |
| SG7966     | TcCLB.508693.190  | 0.0193078986754515 |
| SG7667     | TcCLB.511725.80   | 0.0195076788997102 |
| SG4847     | TcCLB.506009.50   | 0.0195111274654478 |
| SG1583     | TcCLB.509569.90   | 0.0196251587966259 |
| SG6185     | TcCLB.509859.50   | 0.0196251587966259 |
| SG2178     | TcCLB.511633.40   | 0.0196619345289599 |
| SG2213     | TcCLB.511657.50   | 0.0197913584350692 |
| SG7903     | TcCLB.508247.70   | 0.0199111740908318 |
| SG5505     | TcCLB.510425.28   | 0.0199901081770199 |
| SG2483     | TcCLB.508211.70   | 0.0200990627603289 |
| SG8753     | TcCLB.482319.10   | 0.0201312723729188 |
| SG6411     | TcCLB.506177.30   | 0.0201446796937139 |
| SG7105     | TcCLB.511527.70   | 0.0201446796937139 |
| SG1761     | TcCLB.506581.10   | 0.0202962751698627 |
| SG6454     | TcCLB.511229.70   | 0.0205628731081948 |
| SG0483     | TcCLB.483623.10   | 0.0205636132679325 |
| SG1457     | TcCLB.503789.70   | 0.0205881989462773 |
| SG8466     | TcCLB.511391.120  | 0.0205881989462773 |
| SG3370     | TcCLB.503899.100  | 0.0205895201285443 |
| SG7866     | TcCLB.506175.120  | 0.0206709540227159 |
| SG5795     | TcCLB.504827.130  | 0.0207734196799185 |
| SG3389     | TcCLB.506789.160  | 0.0208013024596473 |
| SG8262     | TcCLB.507769.30   | 0.0209514098391131 |
| SG5540     | TcCLB.506883.50   | 0.0211504922511971 |
| SG0766     | TcCLB.509049.30   | 0.0212061782862149 |
| SG3376     | TcCLB.506701.29   | 0.0213374763217716 |
| SG1036     | TcCLB.510749.50   | 0.0213901185491357 |
| SG2139     | TcCLB.508741.190  | 0.0214393514131505 |
| SG4206     | TcCLB.504867.90   | 0.0216536751306489 |
| SG5742     | TcCLB.510007.20   | 0.0217160832777883 |
| SG6206     | TcCLB.507787.100  | 0.0217160832777883 |
| SG8465     | TcCLB.410199.7    | 0.0217160832777883 |
| SG0735     | TcCLB.511467.16   | 0.0217207204568648 |
| SG3317     | TcCLB.508999.200  | 0.0217207204568648 |
| SG5471     | TcCLB.510073.30   | 0.0217207204568648 |
| SG5659     | TcCLB.506419.30   | 0.0217207204568648 |
| SG8729     | TcCLB.506247.40   | 0.0217207204568648 |
| SG5191     | TcCLB.508713.30   | 0.0220237571425985 |
| SG8302     | TcCLB.506335.130  | 0.0220237571425985 |
| SG1918     | TcCLB.509795.30   | 0.022127965044136  |
| SG4409     | TcCLB.510001.20   | 0.022127965044136  |
| SG7091     | TcCLB.506925.450  | 0.0222462157863537 |
| SG0717     | TcCLB.506287.80   | 0.0224156287246756 |
| SG7218     | TcCLB.506925.170  | 0.0225052174765771 |
| SG6893     | TcCLB.511575.90   | 0.0225141408281806 |
| SG5237     | TcCLB.509719.40   | 0.022728156941367  |
| SG6358     | TcCLB.507771.99   | 0.0227698192586372 |
| SG5340     | TcCLB.508999.220  | 0.0227969022699176 |
| SG5668     | TcCLB.510101.59   | 0.0227969022699176 |
| SG0381     | TcCLB.507615.19   | 0.0229171753064637 |
| SG4111     | TcCLB.511655.60   | 0.0229171753064637 |

| Supra gene | Representative ID | FDR                |
|------------|-------------------|--------------------|
| SG8947     | TcCLB.507019.10   | 0.0229708818320326 |
| SG6363     | TcCLB.508119.110  | 0.0229999961644189 |
| SG3344     | TcCLB.511217.70   | 0.023029063840862  |
| SG1782     | TcCLB.510745.49   | 0.0230981733829224 |
| SG2997     | TcCLB.506357.160  | 0.0234391103140453 |
| SG0595     | TcCLB.504575.40   | 0.023491585627777  |
| SG3105     | TcCLB.509053.160  | 0.0235856541641229 |
| SG3743     | TcCLB.511817.10   | 0.0235856541641229 |
| SG4904     | TcCLB.509045.20   | 0.0235856541641229 |
| SG7599     | TcCLB.511211.70   | 0.0235856541641229 |
| SG8131     | TcCLB.504045.30   | 0.0235856541641229 |
| SG0514     | TcCLB.508015.10   | 0.0237447543017074 |
| SG3378     | TcCLB.509243.20   | 0.0242058915141501 |
| SG1254     | TcCLB.506733.80   | 0.0243736656608012 |
| SG6680     | TcCLB.511295.10   | 0.0243736656608012 |
| SG7365     | TcCLB.503479.70   | 0.0243736656608012 |
| SG6164     | TcCLB.511277.500  | 0.0244090093990376 |
| SG6496     | TcCLB.506297.350  | 0.0245046051367006 |
| SG4190     | TcCLB.509835.30   | 0.0245322657192031 |
| SG6606     | TcCLB.511263.40   | 0.0245322657192031 |
| SG4903     | TcCLB.511253.20   | 0.0248698590944527 |
| SG5072     | TcCLB.507831.40   | 0.0248698590944527 |
| SG1742     | TcCLB.509605.20   | 0.0248701391595242 |
| SG3661     | TcCLB.511657.40   | 0.0248701391595242 |
| SG8258     | TcCLB.506247.50   | 0.0248701391595242 |
| SG5464     | TcCLB.508737.150  | 0.0249175057892785 |
| SG8498     | TcCLB.511807.190  | 0.025064397385875  |
| SG5252     | TcCLB.506411.30   | 0.0254308950479314 |
| SG1211     | TcCLB.508811.10   | 0.0254531834389226 |
| SG8405     | TcCLB.504105.100  | 0.0254531834389226 |
| SG8433     | TcCLB.507681.30   | 0.0254531834389226 |
| SG7109     | TcCLB.511181.110  | 0.0255751359490014 |
| SG6394     | TcCLB.507041.120  | 0.0255967824572165 |
| SG7585     | TcCLB.507099.90   | 0.0257208354778338 |
| SG0985     | TcCLB.508129.9    | 0.0258777331429715 |
| SG0601     | TcCLB.509805.210  | 0.0258960959625617 |
| SG6658     | TcCLB.507019.83   | 0.0260114347272649 |
| SG4094     | TcCLB.506505.10   | 0.0261332926865498 |
| SG7798     | TcCLB.511491.130  | 0.0262047661031381 |
| SG7111     | TcCLB.509769.40   | 0.0263462104840861 |
| SG5277     | TcCLB.511165.30   | 0.0265132591225033 |
| SG8066     | TcCLB.506839.30   | 0.0265132591225033 |
| SG7034     | TcCLB.504057.40   | 0.0269596621614689 |
| SG7441     | TcCLB.506945.310  | 0.0269596621614689 |
| SG7700     | TcCLB.510329.180  | 0.0269596621614689 |
| SG5045     | TcCLB.503541.10   | 0.0273455413780259 |
| SG5603     | TcCLB.509033.60   | 0.0273498761049355 |
| SG4082     | TcCLB.509505.20   | 0.0275728413475845 |
| SG2602     | TcCLB.511761.40   | 0.0275983957759491 |
| SG1938     | TcCLB.503559.90   | 0.0277057267427942 |
| SG0669     | TcCLB.504023.10   | 0.0278480279407557 |
| SG0037     | TcCLB.506435.370  | 0.0278639599092353 |
| SG4477     | TcCLB.506979.20   | 0.0278640908082381 |



| Supra gene | Representative ID | FDR                |
|------------|-------------------|--------------------|
| SG8664     | TcCLB.509647.26   | 0.0279532639421914 |
| SG4440     | TcCLB.510969.40   | 0.028214337292649  |
| SG5339     | TcCLB.511431.90   | 0.0282423025198797 |
| SG2847     | TcCLB.509791.80   | 0.0282655679044123 |
| SG6362     | TcCLB.510311.100  | 0.0283040076488786 |
| SG0816     | TcCLB.506829.110  | 0.028541234525014  |
| SG4657     | TcCLB.510259.24   | 0.0286467941926518 |
| SG3920     | TcCLB.510825.20   | 0.0286880212394743 |
| SG6184     | TcCLB.508231.170  | 0.0286880212394743 |
| SG7066     | TcCLB.510513.70   | 0.0287021212066985 |
| SG7362     | TcCLB.510431.190  | 0.0293122217588983 |
| SG0194     | TcCLB.509505.50   | 0.0295229477281763 |
| SG0640     | TcCLB.507951.299  | 0.0295741018785718 |
| SG0859     | TcCLB.511385.90   | 0.0296105360161305 |
| SG5824     | TcCLB.511151.80   | 0.0297103284088614 |
| SG5509     | TcCLB.510579.50   | 0.0299821352768329 |
| SG5802     | TcCLB.511821.90   | 0.0299821352768329 |
| SG8086     | TcCLB.506721.50   | 0.0299821352768329 |
| SG4245     | TcCLB.503505.14   | 0.0301793433389779 |
| SG7016     | TcCLB.506375.80   | 0.0301793433389779 |
| SG1829     | TcCLB.507057.40   | 0.0304575845333712 |
| SG3582     | TcCLB.503975.20   | 0.0304575845333712 |
| SG4320     | TcCLB.508699.40   | 0.0304575845333712 |
| SG5304     | TcCLB.510357.10   | 0.0304575845333712 |
| SG5627     | TcCLB.510663.80   | 0.0304575845333712 |
| SG8505     | TcCLB.508257.180  | 0.0304575845333712 |
| SG4989     | TcCLB.510225.50   | 0.0305075892513768 |
| SG8076     | TcCLB.506247.110  | 0.0306906112085054 |
| SG2731     | TcCLB.504253.20   | 0.0308443347344194 |
| SG2818     | TcCLB.511289.40   | 0.0308443347344194 |
| SG5090     | TcCLB.506559.4    | 0.0308443347344194 |
| SG5773     | TcCLB.511389.100  | 0.0308443347344194 |
| SG5710     | TcCLB.509319.20   | 0.0309468368535741 |
| SG2150     | TcCLB.509027.60   | 0.0311390693705143 |
| SG4334     | TcCLB.507857.10   | 0.0311390693705143 |
| SG4367     | TcCLB.503733.20   | 0.0311390693705143 |
| SG0593     | TcCLB.504053.10   | 0.0311636861665522 |
| SG5238     | TcCLB.507943.60   | 0.0311995641779034 |
| SG1309     | TcCLB.509029.60   | 0.0313204333416644 |
| SG3933     | TcCLB.508543.20   | 0.0313204333416644 |
| SG6587     | TcCLB.509715.70   | 0.0313204333416644 |
| SG6621     | TcCLB.508905.10   | 0.0313204333416644 |
| SG0506     | TcCLB.433677.10   | 0.031660112298406  |
| SG4942     | TcCLB.510045.30   | 0.0316950376592645 |
| SG6915     | TcCLB.506925.110  | 0.0316950376592645 |
| SG3503     | TcCLB.506479.80   | 0.0317118079190839 |
| SG5050     | TcCLB.511517.150  | 0.0317802894624169 |
| SG1861     | TcCLB.509937.160  | 0.0317982453040963 |
| SG1284     | TcCLB.506585.100  | 0.0318118326267312 |
| SG0490     | TcCLB.511287.30   | 0.0318571436696998 |
| SG2151     | TcCLB.506855.60   | 0.0318571436696998 |
| SG3607     | TcCLB.510443.30   | 0.0318571436696998 |
| SG3698     | TcCLB.510889.231  | 0.0318571436696998 |

| Supra gene | Representative ID | FDR                |
|------------|-------------------|--------------------|
| SG0121     | TcCLB.511401.90   | 0.0322483672085141 |
| SG0996     | TcCLB.508153.20   | 0.0322975242021433 |
| SG2300     | TcCLB.509911.40   | 0.0323854175995403 |
| SG2601     | TcCLB.504013.100  | 0.0323854175995403 |
| SG6956     | TcCLB.510535.20   | 0.032447841543767  |
| SG3594     | TcCLB.504125.64   | 0.0324515709377783 |
| SG3332     | TcCLB.508257.170  | 0.0325033210362346 |
| SG4384     | TcCLB.510333.10   | 0.0325033210362346 |
| SG5436     | TcCLB.508357.90   | 0.0325033210362346 |
| SG6063     | TcCLB.509911.110  | 0.0325033210362346 |
| SG6082     | TcCLB.511261.80   | 0.0325033210362346 |
| SG7601     | TcCLB.507093.250  | 0.0325033210362346 |
| SG1516     | TcCLB.508731.40   | 0.032601302082327  |
| SG5234     | TcCLB.503557.40   | 0.032601302082327  |
| SG2430     | TcCLB.510825.30   | 0.0327428644569249 |
| SG2263     | TcCLB.507029.60   | 0.0327958390169205 |
| SG8857     | TcCLB.510817.60   | 0.0328431912388684 |
| SG0635     | TcCLB.506775.30   | 0.0331966472809854 |
| SG4191     | TcCLB.509103.20   | 0.0333428523164522 |
| SG6019     | TcCLB.511001.70   | 0.0333428523164522 |
| SG6599     | TcCLB.511817.20   | 0.0334159710449389 |
| SG8016     | TcCLB.507073.30   | 0.0335981069694722 |
| SG0945     | TcCLB.511555.110  | 0.0336602277495831 |
| SG0868     | TcCLB.504625.70   | 0.033839964336738  |
| SG1142     | TcCLB.510649.24   | 0.033839964336738  |
| SG4106     | TcCLB.503747.40   | 0.0338481841154549 |
| SG7954     | TcCLB.510187.470  | 0.0338711167563309 |
| SG7287     | TcCLB.448567.9    | 0.0338888569496616 |
| SG5459     | TcCLB.506807.20   | 0.0339883902972654 |
| SG8106     | TcCLB.506977.110  | 0.0340083882192818 |
| SG0459     | TcCLB.510605.19   | 0.0341637746876202 |
| SG2114     | TcCLB.504027.10   | 0.0341637746876202 |
| SG0290     | TcCLB.509943.20   | 0.03416667948868   |
| SG4381     | TcCLB.508199.30   | 0.0344652863521806 |
| SG5538     | TcCLB.504741.124  | 0.0344652863521806 |
| SG8210     | TcCLB.506041.60   | 0.0345675190293357 |
| SG8736     | TcCLB.511725.174  | 0.0345675190293357 |
| SG0338     | TcCLB.507105.40   | 0.0349124531099039 |
| SG1879     | TcCLB.504797.130  | 0.0349124531099039 |
| SG2092     | TcCLB.503687.20   | 0.0349274259614672 |
| SG7334     | TcCLB.504147.224  | 0.0350099537048003 |
| SG1781     | TcCLB.511167.20   | 0.0351487555121114 |
| SG3283     | TcCLB.508153.640  | 0.0351487555121114 |
| SG2286     | TcCLB.508193.60   | 0.0351744859677329 |
| SG8971     | TcCLB.511249.44   | 0.0352279487399138 |
| SG4670     | TcCLB.511389.110  | 0.0353702323975136 |
| SG7707     | TcCLB.510187.280  | 0.0356509428176841 |
| SG0476     | TcCLB.504191.10   | 0.0357953773309678 |
| SG4572     | TcCLB.508625.60   | 0.0359183163274713 |
| SG8948     | TcCLB.506445.110  | 0.0359490658897322 |
| SG0024     | TcCLB.404711.10   | 0.0360508639890638 |
| SG0042     | TcCLB.510787.10   | 0.0360508639890638 |
| SG5137     | TcCLB.506937.40   | 0.0360508639890638 |

| Supra gene | Representative ID | FDR                |
|------------|-------------------|--------------------|
| SG0101     | TcCLB.506499.105  | 0.0360816593607279 |
| SG0190     | TcCLB.506885.210  | 0.0360816593607279 |
| SG2609     | TcCLB.504149.20   | 0.0361802372977172 |
| SG2281     | TcCLB.506581.30   | 0.0365293746912955 |
| SG0384     | TcCLB.505171.10   | 0.0365717727452759 |
| SG0255     | TcCLB.507023.220  | 0.0366350531411375 |
| SG1301     | TcCLB.506959.80   | 0.0366350531411375 |
| SG3549     | TcCLB.509979.40   | 0.0366350531411375 |
| SG3702     | TcCLB.509695.140  | 0.0366350531411375 |
| SG6833     | TcCLB.511215.20   | 0.0366350531411375 |
| SG7047     | TcCLB.503651.4    | 0.0366350531411375 |
| SG7938     | TcCLB.507069.120  | 0.0366356767643574 |
| SG2558     | TcCLB.505999.60   | 0.0367594156487892 |
| SG0328     | TcCLB.507533.21   | 0.0368054195309378 |
| SG4131     | TcCLB.507007.74   | 0.0368350765820373 |
| SG0557     | TcCLB.510771.9    | 0.0368425263893942 |
| SG3504     | TcCLB.504231.10   | 0.0368425263893942 |
| SG2793     | TcCLB.509229.60   | 0.0368970637072248 |
| SG0020     | TcCLB.510583.80   | 0.0371110144011556 |
| SG1017     | TcCLB.504199.10   | 0.0371735971593123 |
| SG3867     | TcCLB.510355.250  | 0.0377808136513286 |
| SG5639     | TcCLB.506181.10   | 0.0381436413560502 |
| SG0658     | TcCLB.504013.110  | 0.0383285077384928 |
| SG6417     | TcCLB.506321.340  | 0.0384061142135206 |
| SG8864     | TcCLB.508257.90   | 0.0384061142135206 |
| SG8213     | TcCLB.508547.190  | 0.0384420491309382 |
| SG0732     | TcCLB.511329.10   | 0.038480321926001  |
| SG2494     | TcCLB.508411.60   | 0.038486551944908  |
| SG1991     | TcCLB.508445.30   | 0.0384964396850506 |
| SG2376     | TcCLB.503703.60   | 0.0385969955432223 |
| SG2952     | TcCLB.506145.70   | 0.0386683655265791 |
| SG3403     | TcCLB.508111.30   | 0.0386683655265791 |
| SG4506     | TcCLB.509731.10   | 0.0387158482648549 |
| SG7867     | TcCLB.508409.110  | 0.0387158482648549 |
| SG3414     | TcCLB.506195.120  | 0.0388721531992608 |
| SG7051     | TcCLB.504057.80   | 0.0390916796790294 |
| SG8023     | TcCLB.508173.90   | 0.0393344108129321 |
| SG3580     | TcCLB.510667.30   | 0.0402899644922253 |
| SG2897     | TcCLB.508213.40   | 0.0405832836853079 |
| SG3860     | TcCLB.508893.10   | 0.040700198973831  |
| SG6966     | TcCLB.510295.15   | 0.0407617049002505 |
| SG0827     | TcCLB.505193.50   | 0.040844778963048  |
| SG0575     | TcCLB.510755.40   | 0.0409245736122337 |
| SG1486     | TcCLB.503567.9    | 0.0409245736122337 |
| SG5489     | TcCLB.508909.214  | 0.0409245736122337 |
| SG8855     | TcCLB.507681.210  | 0.0409245736122337 |
| SG0274     | TcCLB.507875.170  | 0.0410531675908255 |
| SG0150     | TcCLB.506279.140  | 0.041329999707117  |
| SG1927     | TcCLB.510309.10   | 0.041329999707117  |
| SG6128     | TcCLB.508503.60   | 0.041329999707117  |
| SG4044     | TcCLB.503727.10   | 0.0415190650335727 |
| SG4891     | TcCLB.503891.50   | 0.0415267534201528 |
| SG0882     | TcCLB.509029.40   | 0.0415973077393345 |

| Supra gene | Representative ID | FDR                |
|------------|-------------------|--------------------|
| SG4201     | TcCLB.508809.50   | 0.0415973077393345 |
| SG6576     | TcCLB.510859.10   | 0.0415973077393345 |
| SG1433     | TcCLB.511577.188  | 0.0420328808427815 |
| SG0800     | TcCLB.508717.50   | 0.0420464837675808 |
| SG6979     | TcCLB.507875.140  | 0.0420845429445904 |
| SG0102     | TcCLB.508221.539  | 0.0421847097078823 |
| SG0990     | TcCLB.510657.70   | 0.0421847097078823 |
| SG2674     | TcCLB.506297.230  | 0.0421847097078823 |
| SG4596     | TcCLB.425969.5    | 0.0422905052860667 |
| SG3758     | TcCLB.507047.134  | 0.0422993848440914 |
| SG5827     | TcCLB.508545.20   | 0.0422993848440914 |
| SG7395     | TcCLB.504147.40   | 0.0422993848440914 |
| SG3138     | TcCLB.510635.40   | 0.042454960622619  |
| SG5230     | TcCLB.510665.60   | 0.042454960622619  |
| SG6782     | TcCLB.506945.300  | 0.0425514377681104 |
| SG0589     | TcCLB.511837.110  | 0.0425557129286181 |
| SG3220     | TcCLB.507915.10   | 0.0425557129286181 |
| SG4224     | TcCLB.509065.120  | 0.0425557129286181 |
| SG6539     | TcCLB.509623.10   | 0.0425557129286181 |
| SG7663     | TcCLB.507053.140  | 0.0425557129286181 |
| SG8107     | TcCLB.510979.60   | 0.0425557129286181 |
| SG0159     | TcCLB.507547.18   | 0.0429696861244894 |
| SG7911     | TcCLB.506425.60   | 0.0430314428331553 |
| SG1959     | TcCLB.508397.10   | 0.0432768993265261 |
| SG3945     | TcCLB.504797.100  | 0.0433590574496301 |
| SG3125     | TcCLB.509153.10   | 0.0434911909280492 |
| SG0340     | TcCLB.511825.200  | 0.0435819366385118 |
| SG4711     | TcCLB.506577.140  | 0.043791178026514  |
| SG5097     | TcCLB.506815.40   | 0.043791178026514  |
| SG3134     | TcCLB.511585.60   | 0.0438481385027002 |
| SG5456     | TcCLB.508351.40   | 0.0438481385027002 |
| SG6154     | TcCLB.508641.180  | 0.0438481385027002 |
| SG7244     | TcCLB.511869.9    | 0.0438481385027002 |
| SG1589     | TcCLB.508999.250  | 0.0439969704869299 |
| SG0430     | TcCLB.503989.50   | 0.0440743176284642 |
| SG8134     | TcCLB.506425.90   | 0.0441875167460395 |
| SG5061     | TcCLB.510725.40   | 0.0443151957842966 |
| SG0434     | TcCLB.509891.70   | 0.0445145320055697 |
| SG3802     | TcCLB.507705.10   | 0.0445145320055697 |
| SG4114     | TcCLB.511245.79   | 0.0445145320055697 |
| SG5364     | TcCLB.506351.35   | 0.0446458617383582 |
| SG5153     | TcCLB.511237.110  | 0.0447587642056845 |
| SG5291     | TcCLB.508943.20   | 0.0447587642056845 |
| SG1449     | TcCLB.503977.30   | 0.0448161002050657 |
| SG3711     | TcCLB.511021.90   | 0.0448338940864881 |
| SG4773     | TcCLB.503415.30   | 0.0448338940864881 |
| SG0197     | TcCLB.507883.10   | 0.0452316400330936 |
| SG4093     | TcCLB.503837.20   | 0.0453788389803751 |
| SG0521     | TcCLB.455721.9    | 0.0453809680589408 |
| SG1703     | TcCLB.506957.120  | 0.0455039280900281 |
| SG7638     | TcCLB.508257.220  | 0.0455039280900281 |
| SG5265     | TcCLB.511389.130  | 0.0456095001387433 |
| SG5443     | TcCLB.509151.90   | 0.0456608416906094 |

| Supra gene | Representative ID | FDR                |
|------------|-------------------|--------------------|
| SG6497     | TcCLB.510735.60   | 0.0459083099546905 |
| SG2835     | TcCLB.504069.10   | 0.046038952891882  |
| SG2391     | TcCLB.507787.80   | 0.0464909084260118 |
| SG8470     | TcCLB.507053.10   | 0.0467027711481378 |
| SG0496     | TcCLB.509007.99   | 0.0467921595884495 |
| SG0728     | TcCLB.507991.10   | 0.0467921595884495 |
| SG0980     | TcCLB.504069.56   | 0.0467921595884495 |
| SG4759     | TcCLB.509331.30   | 0.0467921595884495 |
| SG6595     | TcCLB.407335.9    | 0.0467921595884495 |
| SG8315     | TcCLB.510187.210  | 0.0467921595884495 |
| SG8867     | TcCLB.511277.180  | 0.0467921595884495 |
| SG1513     | TcCLB.503913.40   | 0.0468251068415262 |
| SG4694     | TcCLB.510421.290  | 0.0468251068415262 |
| SG3770     | TcCLB.509317.90   | 0.0470867310411962 |
| SG5833     | TcCLB.506697.10   | 0.0473621680408309 |
| SG4760     | TcCLB.506685.40   | 0.047788821060163  |
| SG4265     | TcCLB.511407.40   | 0.0482538889463553 |
| SG2703     | TcCLB.509601.100  | 0.0484475539710918 |
| SG3608     | TcCLB.511753.90   | 0.0486883513689751 |
| SG3918     | TcCLB.507073.20   | 0.0486883513689751 |
| SG8762     | TcCLB.511367.240  | 0.0486883513689751 |
| SG8194     | TcCLB.511807.160  | 0.0486914328711686 |
| SG4153     | TcCLB.508199.20   | 0.0488174603771544 |
| SG4501     | TcCLB.503945.40   | 0.0488174603771544 |
| SG1364     | TcCLB.511575.30   | 0.0489502044479704 |
| SG4732     | TcCLB.506413.70   | 0.0489502044479704 |
| SG4751     | TcCLB.508777.40   | 0.0490404989527962 |
| SG2929     | TcCLB.424123.20   | 0.0492157025856115 |
| SG1977     | TcCLB.509541.10   | 0.0492673842539305 |
| SG8850     | TcCLB.506247.80   | 0.0493817349571399 |
| SG8196     | TcCLB.511895.50   | 0.0495866141109    |
| SG3857     | TcCLB.506735.70   | 0.0496272056135567 |
| SG3380     | TcCLB.503823.30   | 0.049938944224417  |
| SG7392     | TcCLB.504125.60   | 0.049938944224417  |
| SG8781     | TcCLB.510329.20   | 0.049938944224417  |
| SG3820     | TcCLB.506227.160  | 0.0500056571722497 |
| SG0727     | TcCLB.508411.50   | 0.0503430996030815 |
| SG5408     | TcCLB.508507.50   | 0.050356828497984  |
| SG3734     | TcCLB.507317.40   | 0.0504239933467584 |
| SG2655     | TcCLB.510257.60   | 0.050561631332042  |
| SG3029     | TcCLB.511837.90   | 0.050561631332042  |
| SG7751     | TcCLB.508153.140  | 0.050561631332042  |
| SG3469     | TcCLB.510531.40   | 0.0506377747951142 |
| SG5838     | TcCLB.508501.250  | 0.0507180251670306 |
| SG3274     | TcCLB.508881.20   | 0.0507236028380874 |
| SG3102     | TcCLB.509023.120  | 0.0508617002615517 |
| SG3446     | TcCLB.511535.30   | 0.0508617002615517 |
| SG5816     | TcCLB.503897.70   | 0.0508617002615517 |
| SG6134     | TcCLB.509791.30   | 0.0508617002615517 |
| SG0768     | TcCLB.506247.370  | 0.0509518873255387 |
| SG0733     | TcCLB.508153.370  | 0.0509578462915099 |
| SG1354     | TcCLB.509747.50   | 0.0509578462915099 |
| SG2738     | TcCLB.509023.50   | 0.0509578462915099 |

| Supra gene | Representative ID | FDR                |
|------------|-------------------|--------------------|
| SG4148     | TcCLB.504131.130  | 0.0514002749000654 |
| SG4798     | TcCLB.511245.190  | 0.0514882502440141 |
| SG1392     | TcCLB.506989.30   | 0.0519615663088109 |
| SG6162     | TcCLB.511287.20   | 0.0519615663088109 |
| SG8501     | TcCLB.511389.70   | 0.0519615663088109 |
| SG0047     | TcCLB.508291.50   | 0.0521360428185652 |
| SG2912     | TcCLB.510953.30   | 0.0521399241271439 |
| SG4619     | TcCLB.508901.20   | 0.0523915611548842 |
| SG2501     | TcCLB.508851.110  | 0.0525832787487145 |
| SG4370     | TcCLB.508667.49   | 0.0525963133622681 |
| SG3814     | TcCLB.508153.680  | 0.0527412943412306 |
| SG7234     | TcCLB.507429.60   | 0.0527990389231757 |
| SG6968     | TcCLB.507099.80   | 0.0534377562358688 |
| SG5295     | TcCLB.511825.80   | 0.0534957476957757 |
| SG5351     | TcCLB.511817.134  | 0.0535411690234516 |
| SG7269     | TcCLB.509583.19   | 0.053703303678705  |
| SG2824     | TcCLB.509005.60   | 0.0537399503403863 |
| SG1940     | TcCLB.508153.240  | 0.0537966840911445 |
| SG1970     | TcCLB.507081.20   | 0.0538080782012855 |
| SG5939     | TcCLB.503847.80   | 0.0538080782012855 |
| SG8797     | TcCLB.506559.470  | 0.0538080782012855 |
| SG0425     | TcCLB.503781.10   | 0.0539416383767004 |
| SG6276     | TcCLB.503885.100  | 0.0543841594134217 |
| SG8640     | TcCLB.422955.10   | 0.0544176407570344 |
| SG1947     | TcCLB.509063.4    | 0.0545089643401786 |
| SG0875     | TcCLB.508837.80   | 0.0548054331098046 |
| SG6992     | TcCLB.507521.115  | 0.0549701179897533 |
| SG3115     | TcCLB.511321.60   | 0.0550075630655266 |
| SG3822     | TcCLB.506469.90   | 0.0552581307945901 |
| SG0120     | TcCLB.506355.100  | 0.055617073897996  |
| SG0953     | TcCLB.508153.610  | 0.055617073897996  |
| SG1388     | TcCLB.509611.150  | 0.055617073897996  |
| SG1850     | TcCLB.510155.10   | 0.055617073897996  |
| SG3017     | TcCLB.506195.160  | 0.055617073897996  |
| SG6434     | TcCLB.508865.30   | 0.055617073897996  |
| SG6762     | TcCLB.511189.70   | 0.055617073897996  |
| SG7534     | TcCLB.506737.100  | 0.055617073897996  |
| SG5433     | TcCLB.458759.14   | 0.0557015011475991 |
| SG7141     | TcCLB.508307.134  | 0.0557015011475991 |
| SG0044     | TcCLB.511593.40   | 0.0557148347222366 |
| SG4095     | TcCLB.506479.120  | 0.0558291152328582 |
| SG6889     | TcCLB.508147.140  | 0.0560773257507475 |
| SG3058     | TcCLB.510575.120  | 0.0561859534055737 |
| SG8382     | TcCLB.509995.20   | 0.0561859534055737 |
| SG7591     | TcCLB.503479.40   | 0.0562112591750172 |
| SG4581     | TcCLB.509051.40   | 0.0562476968416002 |
| SG3915     | TcCLB.506851.20   | 0.056282393638208  |
| SG8619     | TcCLB.508257.150  | 0.056282393638208  |
| SG4536     | TcCLB.506319.70   | 0.0565660060176457 |
| SG0634     | TcCLB.511067.20   | 0.0566373832101047 |
| SG2619     | TcCLB.509229.30   | 0.0566373832101047 |
| SG7155     | TcCLB.507099.100  | 0.0567034116108563 |
| SG0464     | TcCLB.510339.50   | 0.0568430528308697 |

| Supra gene | Representative ID | FDR                |
|------------|-------------------|--------------------|
| SG8453     | TcCLB.508479.213  | 0.0568430528308697 |
| SG5650     | TcCLB.503929.20   | 0.0568497353267074 |
| SG3048     | TcCLB.509151.140  | 0.0570465601809308 |
| SG5541     | TcCLB.506999.120  | 0.0570465601809308 |
| SG7462     | TcCLB.509455.114  | 0.0570465601809308 |
| SG0100     | TcCLB.508629.100  | 0.0572859248623029 |
| SG0749     | TcCLB.504051.40   | 0.0572859248623029 |
| SG0848     | TcCLB.508461.80   | 0.0573806582415284 |
| SG0814     | TcCLB.508909.330  | 0.0574689254515559 |
| SG3893     | TcCLB.507951.60   | 0.057532894769663  |
| SG4040     | TcCLB.508601.90   | 0.057532894769663  |
| SG5271     | TcCLB.506777.30   | 0.0575859814209165 |
| SG1529     | TcCLB.503487.60   | 0.0578299664671324 |
| SG6471     | TcCLB.509051.20   | 0.057925386595239  |
| SG7573     | TcCLB.504153.90   | 0.057925386595239  |
| SG0439     | TcCLB.508821.50   | 0.0580163961389541 |
| SG2031     | TcCLB.506399.70   | 0.0580163961389541 |
| SG2568     | TcCLB.506855.180  | 0.0580163961389541 |
| SG3219     | TcCLB.511817.40   | 0.0581172374470769 |
| SG0765     | TcCLB.509575.30   | 0.0584513071772309 |
| SG3168     | TcCLB.508413.60   | 0.0584513071772309 |
| SG5294     | TcCLB.503891.40   | 0.0584513071772309 |
| SG6765     | TcCLB.509635.9    | 0.0584513071772309 |
| SG1304     | TcCLB.508707.130  | 0.0585579134225869 |
| SG0664     | TcCLB.508909.170  | 0.0586060905395898 |
| SG0152     | TcCLB.507965.10   | 0.0586420613389104 |
| SG3176     | TcCLB.511051.10   | 0.0586463214790693 |
| SG6798     | TcCLB.510269.10   | 0.0586463214790693 |
| SG3733     | TcCLB.510421.29   | 0.0587644258036511 |
| SG1153     | TcCLB.507737.30   | 0.0587750422124261 |
| SG8155     | TcCLB.510187.480  | 0.0587855066361286 |
| SG8089     | TcCLB.506445.100  | 0.0587916830003865 |
| SG4464     | TcCLB.509567.50   | 0.0588081461532528 |
| SG4971     | TcCLB.509229.130  | 0.0588081461532528 |
| SG7547     | TcCLB.506625.150  | 0.0588081461532528 |
| SG5819     | TcCLB.511439.90   | 0.0588976687224272 |
| SG5597     | TcCLB.503999.60   | 0.0590019218989674 |
| SG0116     | TcCLB.508293.60   | 0.0590046655016879 |
| SG0158     | TcCLB.507747.10   | 0.059256377998674  |
| SG2789     | TcCLB.506691.60   | 0.059256377998674  |
| SG1015     | TcCLB.504147.120  | 0.0593314688814002 |
| SG5356     | TcCLB.508135.10   | 0.0593314688814002 |
| SG4349     | TcCLB.503581.30   | 0.0594617439053677 |
| SG2017     | TcCLB.511661.40   | 0.0594639398412584 |
| SG2248     | TcCLB.508153.560  | 0.0594639398412584 |
| SG4626     | TcCLB.509049.20   | 0.059655428402366  |
| SG4996     | TcCLB.507257.90   | 0.059655428402366  |
| SG5008     | TcCLB.511245.160  | 0.059655428402366  |
| SG1652     | TcCLB.509799.90   | 0.0597782052228401 |
| SG5148     | TcCLB.511267.24   | 0.0598976761928715 |
| SG1988     | TcCLB.507049.10   | 0.0600144953060368 |
| SG1315     | TcCLB.509207.120  | 0.0602697539030073 |
| SG5698     | TcCLB.511529.250  | 0.0602697539030073 |



| Supra gene | Representative ID | FDR                |
|------------|-------------------|--------------------|
| SG7197     | TcCLB.511211.49   | 0.0603172652811238 |
| SG2343     | TcCLB.506619.90   | 0.0603791605887808 |
| SG6173     | TcCLB.511815.60   | 0.0607259668372798 |
| SG5181     | TcCLB.507895.100  | 0.0608222774485896 |
| SG5797     | TcCLB.503943.14   | 0.0608568272007583 |
| SG5831     | TcCLB.508153.634  | 0.0614006544706451 |
| SG1345     | TcCLB.506825.200  | 0.0614940312271365 |
| SG0284     | TcCLB.511807.100  | 0.0615207683793502 |
| SG7013     | TcCLB.511421.185  | 0.0618369991365174 |
| SG0948     | TcCLB.508625.100  | 0.0620737481298151 |
| SG3400     | TcCLB.510823.80   | 0.0622081100828708 |
| SG3427     | TcCLB.507945.20   | 0.0622252635424944 |
| SG5363     | TcCLB.508707.227  | 0.0625229168844727 |
| SG7245     | TcCLB.511867.120  | 0.0626506113001617 |
| SG8696     | TcCLB.511511.6    | 0.0627564939689412 |
| SG0052     | TcCLB.506289.140  | 0.0629822139659322 |
| SG3935     | TcCLB.509507.40   | 0.063018688977466  |
| SG4444     | TcCLB.505193.100  | 0.0631165811143532 |
| SG4628     | TcCLB.507017.70   | 0.0635588251787945 |
| SG6675     | TcCLB.510339.100  | 0.0635588251787945 |
| SG8573     | TcCLB.507053.20   | 0.0636976976221871 |
| SG6972     | TcCLB.510431.230  | 0.0637593617605927 |
| SG4941     | TcCLB.510359.20   | 0.0642544736073884 |
| SG6256     | TcCLB.511507.70   | 0.0642544736073884 |
| SG5506     | TcCLB.508387.100  | 0.0643915515635975 |
| SG2201     | TcCLB.504175.40   | 0.0652127389466104 |
| SG3374     | TcCLB.507801.160  | 0.0652127389466104 |
| SG3646     | TcCLB.511277.560  | 0.0652127389466104 |
| SG7169     | TcCLB.504153.70   | 0.0652127389466104 |
| SG1297     | TcCLB.506529.260  | 0.0653051523722173 |
| SG4100     | TcCLB.504243.20   | 0.0653471663436577 |
| SG2260     | TcCLB.509027.50   | 0.0657903582157372 |
| SG4980     | TcCLB.511511.60   | 0.0658771713906583 |
| SG2538     | TcCLB.510659.230  | 0.0665262373501167 |
| SG7639     | TcCLB.509527.130  | 0.06662381391616   |
| SG2596     | TcCLB.506985.40   | 0.0666895097059033 |
| SG5548     | TcCLB.510351.90   | 0.0666895097059033 |
| SG0296     | TcCLB.508939.50   | 0.0671467855931207 |
| SG0750     | TcCLB.508153.460  | 0.0671467855931207 |
| SG0188     | TcCLB.511173.80   | 0.0673310340897128 |
| SG1259     | TcCLB.508075.50   | 0.0673310340897128 |
| SG2034     | TcCLB.507963.60   | 0.0674258934552342 |
| SG3130     | TcCLB.509539.50   | 0.0674258934552342 |
| SG5952     | TcCLB.508547.80   | 0.0674258934552342 |
| SG1903     | TcCLB.510835.10   | 0.06790043905668   |
| SG6387     | TcCLB.504427.50   | 0.0681532529608935 |
| SG1054     | TcCLB.507011.120  | 0.0681653005095744 |
| SG4614     | TcCLB.504185.40   | 0.0681653005095744 |
| SG6338     | TcCLB.511653.60   | 0.0682512662443841 |
| SG5805     | TcCLB.503635.10   | 0.0685035116233497 |
| SG2115     | TcCLB.509563.40   | 0.0685097324661339 |
| SG2879     | TcCLB.511661.90   | 0.0686420516598029 |
| SG5261     | TcCLB.509795.40   | 0.0686420516598029 |

| Supra gene | Representative ID | FDR                |
|------------|-------------------|--------------------|
| SG6946     | TcCLB.510877.100  | 0.0689288277229423 |
| SG0961     | TcCLB.509939.19   | 0.0689423103042054 |
| SG4446     | TcCLB.511859.30   | 0.0689423103042054 |
| SG5656     | TcCLB.504013.30   | 0.0691863484651608 |
| SG6337     | TcCLB.506247.20   | 0.0691934504681385 |
| SG2022     | TcCLB.504003.80   | 0.0693447565129414 |
| SG4767     | TcCLB.503625.10   | 0.06939589268365   |
| SG5728     | TcCLB.511139.10   | 0.06939589268365   |
| SG0377     | TcCLB.508621.10   | 0.0695918973666453 |
| SG7341     | TcCLB.506625.180  | 0.0696037071383382 |
| SG3971     | TcCLB.506241.170  | 0.0699273436390914 |
| SG4162     | TcCLB.505193.84   | 0.0699273436390914 |
| SG5933     | TcCLB.510889.221  | 0.0699273436390914 |
| SG5452     | TcCLB.440099.10   | 0.0702096122693611 |
| SG5470     | TcCLB.508109.14   | 0.0702096122693611 |
| SG6828     | TcCLB.506925.400  | 0.0702096122693611 |
| SG7246     | TcCLB.506625.210  | 0.0702923238434033 |
| SG0617     | TcCLB.504575.20   | 0.0703731564065354 |
| SG4083     | TcCLB.509151.60   | 0.070525046150614  |
| SG0072     | TcCLB.505699.10   | 0.0707171513789418 |
| SG1502     | TcCLB.509643.50   | 0.0707171513789418 |
| SG2294     | TcCLB.506851.30   | 0.0707171513789418 |
| SG2393     | TcCLB.511281.40   | 0.0707171513789418 |
| SG3052     | TcCLB.510661.270  | 0.0707171513789418 |
| SG3426     | TcCLB.503809.120  | 0.0707171513789418 |
| SG3785     | TcCLB.511269.40   | 0.0707171513789418 |
| SG4009     | TcCLB.506287.120  | 0.0707171513789418 |
| SG4157     | TcCLB.504073.20   | 0.0707171513789418 |
| SG5241     | TcCLB.510065.30   | 0.0707171513789418 |
| SG5260     | TcCLB.511555.20   | 0.0707171513789418 |
| SG5418     | TcCLB.510339.54   | 0.0707171513789418 |
| SG8656     | TcCLB.511283.280  | 0.0707171513789418 |
| SG1042     | TcCLB.509767.200  | 0.0708760670523942 |
| SG7922     | TcCLB.510873.10   | 0.0710691162311879 |
| SG1585     | TcCLB.511671.90   | 0.0711564489257653 |
| SG3526     | TcCLB.508909.20   | 0.0711564489257653 |
| SG6340     | TcCLB.511741.50   | 0.0711564489257653 |
| SG5818     | TcCLB.509911.100  | 0.0713509855793492 |
| SG1495     | TcCLB.509065.36   | 0.0714365944718919 |
| SG6188     | TcCLB.509179.130  | 0.0717696254131197 |
| SG2571     | TcCLB.509167.70   | 0.0718439356252158 |
| SG2014     | TcCLB.506575.54   | 0.071928624390026  |
| SG2664     | TcCLB.506501.240  | 0.071928624390026  |
| SG7811     | TcCLB.508737.60   | 0.071928624390026  |
| SG4065     | TcCLB.506435.170  | 0.0720260077860675 |
| SG2032     | TcCLB.508351.10   | 0.0721233864172174 |
| SG2846     | TcCLB.509399.180  | 0.0724059482162094 |
| SG1902     | TcCLB.510663.50   | 0.0727559501753315 |
| SG3677     | TcCLB.508817.10   | 0.0727559501753315 |
| SG5033     | TcCLB.508153.180  | 0.0727559501753315 |
| SG5732     | TcCLB.509789.40   | 0.0727559501753315 |
| SG0495     | TcCLB.507809.110  | 0.0729381159662476 |
| SG4587     | TcCLB.511245.150  | 0.0729381159662476 |

| Supra gene | Representative ID | FDR                |
|------------|-------------------|--------------------|
| SG0610     | TcCLB.504167.30   | 0.0729539341782703 |
| SG3818     | TcCLB.503823.140  | 0.0729539341782703 |
| SG1442     | TcCLB.511499.50   | 0.073107646605068  |
| SG3349     | TcCLB.511543.60   | 0.073107646605068  |
| SG4858     | TcCLB.509571.10   | 0.073107646605068  |
| SG6489     | TcCLB.503917.7    | 0.073107646605068  |
| SG2980     | TcCLB.508817.110  | 0.0734696526939942 |
| SG6551     | TcCLB.507603.110  | 0.0735838628647011 |
| SG3072     | TcCLB.509033.80   | 0.0736430000357049 |
| SG3755     | TcCLB.511517.30   | 0.0736430000357049 |
| SG4665     | TcCLB.503583.80   | 0.0738488983006901 |
| SG4218     | TcCLB.509715.140  | 0.0740322655591747 |
| SG7426     | TcCLB.506543.100  | 0.074217744929861  |
| SG0691     | TcCLB.508215.9    | 0.0743344192504723 |
| SG7354     | TcCLB.509585.10   | 0.0743344192504723 |
| SG7775     | TcCLB.506559.430  | 0.0743346516926458 |
| SG8357     | TcCLB.506559.380  | 0.0744398178257276 |
| SG3660     | TcCLB.506445.40   | 0.0744524949313577 |
| SG8170     | TcCLB.508827.50   | 0.0745377777584233 |
| SG1960     | TcCLB.507735.20   | 0.0747534154562697 |
| SG5640     | TcCLB.510421.180  | 0.0747534154562697 |
| SG5832     | TcCLB.503769.40   | 0.0748539542757372 |
| SG1739     | TcCLB.509567.10   | 0.0749010271449666 |
| SG5740     | TcCLB.436521.9    | 0.0751705288363305 |
| SG4911     | TcCLB.509099.30   | 0.0751759603782904 |
| SG7103     | TcCLB.511175.20   | 0.0751759603782904 |
| SG1447     | TcCLB.509717.60   | 0.0752325294978034 |
| SG1607     | TcCLB.511647.10   | 0.0754482315677118 |
| SG4373     | TcCLB.511871.90   | 0.0754482315677118 |
| SG8082     | TcCLB.511491.30   | 0.0754482315677118 |
| SG3334     | TcCLB.507023.110  | 0.0754707420939776 |
| SG3467     | TcCLB.503617.10   | 0.0757633169673115 |
| SG0455     | TcCLB.509823.4    | 0.0758285045427125 |
| SG1548     | TcCLB.511865.40   | 0.0758285045427125 |
| SG3991     | TcCLB.511807.40   | 0.0759236735775179 |
| SG6096     | TcCLB.509643.70   | 0.0759236735775179 |
| SG6487     | TcCLB.509471.10   | 0.0759236735775179 |
| SG2747     | TcCLB.509611.130  | 0.0759542408366919 |
| SG5738     | TcCLB.509965.394  | 0.0759542408366919 |
| SG2390     | TcCLB.506337.20   | 0.0763942160634593 |
| SG6280     | TcCLB.511635.40   | 0.076830652607678  |
| SG0887     | TcCLB.506851.10   | 0.0768515045787677 |
| SG1347     | TcCLB.504113.30   | 0.0768515045787677 |
| SG1605     | TcCLB.509937.220  | 0.0768515045787677 |
| SG8668     | TcCLB.507209.10   | 0.0768515045787677 |
| SG2030     | TcCLB.506989.150  | 0.0768871899208187 |
| SG4434     | TcCLB.511153.64   | 0.0768871899208187 |
| SG8000     | TcCLB.511277.330  | 0.0769276224491312 |
| SG1691     | TcCLB.503419.20   | 0.0769480826582592 |
| SG2665     | TcCLB.511517.70   | 0.0769480826582592 |
| SG3402     | TcCLB.506529.50   | 0.0769480826582592 |
| SG7520     | TcCLB.506625.84   | 0.0769480826582592 |
| SG5362     | TcCLB.509471.30   | 0.0769835994163448 |

| Supra gene | Representative ID | FDR                |
|------------|-------------------|--------------------|
| SG4726     | TcCLB.510065.40   | 0.0771702674621784 |
| SG1534     | TcCLB.508851.79   | 0.0771728323158276 |
| SG2711     | TcCLB.504867.10   | 0.0772890426714998 |
| SG7210     | TcCLB.504153.120  | 0.0777314085386046 |
| SG4586     | TcCLB.503797.10   | 0.0778591768688618 |
| SG8447     | TcCLB.511277.290  | 0.0779117190103046 |
| SG0271     | TcCLB.508739.40   | 0.0779482256718922 |
| SG1020     | TcCLB.508625.160  | 0.0779482256718922 |
| SG1178     | TcCLB.510347.20   | 0.0779482256718922 |
| SG6214     | TcCLB.506855.350  | 0.0779482256718922 |
| SG7986     | TcCLB.511907.310  | 0.07798187796167   |
| SG5755     | TcCLB.508893.20   | 0.0785143335495312 |
| SG4259     | TcCLB.504079.10   | 0.0785741809486499 |
| SG0650     | TcCLB.506181.70   | 0.0786512559727343 |
| SG0792     | TcCLB.508065.60   | 0.0786512559727343 |
| SG2973     | TcCLB.511517.160  | 0.0786512559727343 |
| SG2513     | TcCLB.509059.50   | 0.0788501915869284 |
| SG1066     | TcCLB.510433.10   | 0.0792423554134897 |
| SG8806     | TcCLB.508461.410  | 0.0792423554134897 |
| SG1720     | TcCLB.503891.54   | 0.0792953610595557 |
| SG7964     | TcCLB.508827.20   | 0.0793871550544685 |
| SG0235     | TcCLB.504703.20   | 0.0794056409907276 |
| SG8077     | TcCLB.508251.40   | 0.0794056409907276 |
| SG8350     | TcCLB.510483.250  | 0.0794402595246576 |
| SG1948     | TcCLB.511747.30   | 0.0795742821507744 |
| SG8881     | TcCLB.510183.10   | 0.0797511824038872 |
| SG7097     | TcCLB.506763.260  | 0.0798275952320111 |
| SG2137     | TcCLB.510155.110  | 0.0798345903056067 |
| SG7385     | TcCLB.508227.20   | 0.0798345903056067 |
| SG5685     | TcCLB.511823.70   | 0.0798460484007876 |
| SG4352     | TcCLB.506957.46   | 0.0802109428597266 |
| SG1023     | TcCLB.503919.60   | 0.0805393357802744 |
| SG6790     | TcCLB.511599.80   | 0.0805393357802744 |
| SG7981     | TcCLB.503519.30   | 0.0806740544363258 |
| SG8944     | TcCLB.507649.90   | 0.0811896361212344 |
| SG6330     | TcCLB.509399.170  | 0.081263464830252  |
| SG7802     | TcCLB.506419.69   | 0.0815361692877804 |
| SG3137     | TcCLB.511293.30   | 0.0815666288183038 |
| SG8461     | TcCLB.508479.370  | 0.0817541023155862 |
| SG0776     | TcCLB.510003.20   | 0.0820513376143436 |
| SG1657     | TcCLB.510435.10   | 0.0820513376143436 |
| SG2103     | TcCLB.506525.70   | 0.0820513376143436 |
| SG3869     | TcCLB.506577.20   | 0.0820513376143436 |
| SG4618     | TcCLB.511283.130  | 0.0820513376143436 |
| SG4899     | TcCLB.506753.230  | 0.0820513376143436 |
| SG6783     | TcCLB.511603.70   | 0.0820513376143436 |
| SG3188     | TcCLB.509777.130  | 0.0820718904730557 |
| SG2054     | TcCLB.507801.130  | 0.0821061058318357 |
| SG3182     | TcCLB.510879.80   | 0.0825807841711642 |
| SG1214     | TcCLB.503551.20   | 0.0826630454774646 |
| SG2302     | TcCLB.509207.90   | 0.0826630454774646 |
| SG2983     | TcCLB.506297.120  | 0.0826630454774646 |
| SG5112     | TcCLB.506363.110  | 0.0826630454774646 |

| Supra gene | Representative ID | FDR                |
|------------|-------------------|--------------------|
| SG7519     | TcCLB.504073.10   | 0.0826630454774646 |
| SG0964     | TcCLB.510655.120  | 0.082875784202173  |
| SG3887     | TcCLB.510667.80   | 0.0829370754586043 |
| SG3985     | TcCLB.503515.20   | 0.0829370754586043 |
| SG4641     | TcCLB.507765.20   | 0.0829370754586043 |
| SG7409     | TcCLB.504149.30   | 0.0829370754586043 |
| SG2209     | TcCLB.508657.10   | 0.0830236843559242 |
| SG4845     | TcCLB.510121.170  | 0.0830236843559242 |
| SG4139     | TcCLB.506297.320  | 0.0835044812896504 |
| SG3603     | TcCLB.510359.120  | 0.0835583784010318 |
| SG3046     | TcCLB.508831.20   | 0.0837374434153261 |
| SG7557     | TcCLB.506117.9    | 0.0837374434153261 |
| SG1845     | TcCLB.503939.120  | 0.0839067309096333 |
| SG3983     | TcCLB.506893.25   | 0.0839067309096333 |
| SG6399     | TcCLB.507765.120  | 0.0843541060563906 |
| SG2096     | TcCLB.510155.160  | 0.0843574194617031 |
| SG6478     | TcCLB.509937.20   | 0.0845026029221735 |
| SG7508     | TcCLB.508829.9    | 0.0849323838046342 |
| SG1775     | TcCLB.507601.80   | 0.0851532797456201 |
| SG3397     | TcCLB.510357.80   | 0.0852046294417074 |
| SG1635     | TcCLB.507003.60   | 0.0852461180488869 |
| SG6117     | TcCLB.508411.10   | 0.0852461180488869 |
| SG7763     | TcCLB.508461.84   | 0.0852461180488869 |
| SG4411     | TcCLB.506691.70   | 0.0854870520568208 |
| SG5720     | TcCLB.503823.110  | 0.0857366708190291 |
| SG2327     | TcCLB.506625.120  | 0.0859580220615919 |
| SG5667     | TcCLB.509607.60   | 0.0861175872332859 |
| SG4577     | TcCLB.510357.20   | 0.0861814141285745 |
| SG7617     | TcCLB.507041.55   | 0.0864308945177945 |
| SG8111     | TcCLB.508739.21   | 0.0864308945177945 |
| SG8771     | TcCLB.506977.40   | 0.0864308945177945 |
| SG5059     | TcCLB.505945.60   | 0.0869653433662406 |
| SG6409     | TcCLB.506337.30   | 0.0872564327619117 |
| SG1376     | TcCLB.507663.30   | 0.0874736534923135 |
| SG2318     | TcCLB.511031.20   | 0.0874736534923135 |
| SG4254     | TcCLB.504243.30   | 0.0874736534923135 |
| SG4799     | TcCLB.507073.49   | 0.0874736534923135 |
| SG6472     | TcCLB.507807.30   | 0.0874736534923135 |
| SG3986     | TcCLB.510719.80   | 0.0875991761007902 |
| SG4568     | TcCLB.511281.20   | 0.0875991761007902 |
| SG2134     | TcCLB.503693.20   | 0.0876907297646672 |
| SG7238     | TcCLB.509269.4    | 0.087965615293661  |
| SG6892     | TcCLB.509705.10   | 0.088200568409168  |
| SG1122     | TcCLB.504019.3    | 0.0882186570326387 |
| SG1526     | TcCLB.506885.300  | 0.0882186570326387 |
| SG3754     | TcCLB.505171.90   | 0.0882186570326387 |
| SG6881     | TcCLB.509247.60   | 0.0882700388880824 |
| SG7690     | TcCLB.511283.184  | 0.0883191278454308 |
| SG4924     | TcCLB.508851.160  | 0.0887890042320295 |
| SG6278     | TcCLB.509985.50   | 0.0887890042320295 |
| SG7348     | TcCLB.507099.110  | 0.0887890042320295 |
| SG2146     | TcCLB.506679.210  | 0.088817230692544  |
| SG2461     | TcCLB.511383.80   | 0.088817230692544  |

| Supra gene | Representative ID | FDR                |
|------------|-------------------|--------------------|
| SG3479     | TcCLB.507897.30   | 0.0890788218688853 |
| SG4880     | TcCLB.511277.486  | 0.0891986781514472 |
| SG5708     | TcCLB.511153.60   | 0.0893510423788064 |
| SG6784     | TcCLB.510621.49   | 0.0894214262224999 |
| SG2631     | TcCLB.503847.70   | 0.0894800244160935 |
| SG1274     | TcCLB.504213.90   | 0.0899745498224773 |
| SG2132     | TcCLB.508645.50   | 0.0902780441375908 |
| SG4735     | TcCLB.508263.30   | 0.0904869588558517 |
| SG2404     | TcCLB.508989.30   | 0.0910265190271366 |
| SG6238     | TcCLB.503809.75   | 0.0910326742028647 |
| SG4003     | TcCLB.506925.120  | 0.0912144534094899 |
| SG2898     | TcCLB.503843.20   | 0.0913128065183706 |
| SG8914     | TcCLB.508461.440  | 0.0913655089675605 |
| SG6081     | TcCLB.506175.100  | 0.0917665017078802 |
| SG0731     | TcCLB.506559.559  | 0.0919702185434925 |
| SG1266     | TcCLB.510889.10   | 0.0919702185434925 |
| SG3148     | TcCLB.510105.40   | 0.0919702185434925 |
| SG6503     | TcCLB.509287.60   | 0.0920762152284638 |
| SG3221     | TcCLB.508693.80   | 0.0922757766388034 |
| SG6112     | TcCLB.509103.39   | 0.0922757766388034 |
| SG6886     | TcCLB.504147.130  | 0.0926293464243335 |
| SG6640     | TcCLB.511491.150  | 0.0926396248460404 |
| SG6292     | TcCLB.507925.50   | 0.0936457902602019 |
| SG7837     | TcCLB.511283.200  | 0.0936457902602019 |
| SG8709     | TcCLB.511019.84   | 0.0936457902602019 |
| SG3187     | TcCLB.506855.110  | 0.0939287571535913 |
| SG0343     | TcCLB.457101.20   | 0.0944619371444065 |
| SG4620     | TcCLB.505999.180  | 0.0944619371444065 |
| SG5530     | TcCLB.509913.20   | 0.0944619371444065 |
| SG6079     | TcCLB.504741.250  | 0.0944619371444065 |
| SG7435     | TcCLB.510877.80   | 0.0944619371444065 |
| SG0467     | TcCLB.508141.70   | 0.0946533218414005 |
| SG5998     | TcCLB.503687.10   | 0.0952433093682981 |
| SG7992     | TcCLB.508461.200  | 0.0952433093682981 |
| SG5887     | TcCLB.510121.180  | 0.0953168018220343 |
| SG3356     | TcCLB.510303.60   | 0.0955626395053956 |
| SG1239     | TcCLB.508637.150  | 0.0957738556367985 |
| SG1088     | TcCLB.508995.69   | 0.0959157448812255 |
| SG6584     | TcCLB.510821.10   | 0.0959268851956784 |
| SG0337     | TcCLB.511825.40   | 0.096413735997904  |
| SG5573     | TcCLB.511389.140  | 0.0965041097527616 |
| SG8805     | TcCLB.507703.10   | 0.0968412421816028 |
| SG7744     | TcCLB.511827.20   | 0.0969373114421162 |
| SG0397     | TcCLB.509111.19   | 0.0971476938769457 |
| SG3229     | TcCLB.509893.20   | 0.0975058335964553 |
| SG2301     | TcCLB.506779.90   | 0.0976205716524699 |
| SG6020     | TcCLB.508965.39   | 0.0976205716524699 |
| SG0472     | TcCLB.506297.150  | 0.0977055207182715 |
| SG3200     | TcCLB.507007.40   | 0.0977055207182715 |
| SG3916     | TcCLB.508785.10   | 0.0977435208146532 |
| SG3739     | TcCLB.506975.63   | 0.0979654267935607 |
| SG4857     | TcCLB.507047.140  | 0.0979654267935607 |
| SG8463     | TcCLB.511809.30   | 0.0979654267935607 |

| Supra gene | Representative ID | FDR                |
|------------|-------------------|--------------------|
| SG8360     | TcCLB.507019.50   | 0.0980570925214038 |
| SG4717     | TcCLB.511239.49   | 0.098129696566785  |
| SG6386     | TcCLB.506753.110  | 0.098129696566785  |
| SG6415     | TcCLB.507049.50   | 0.098162733916502  |
| SG5784     | TcCLB.510835.24   | 0.0983006400639524 |
| SG8096     | TcCLB.508919.150  | 0.0983784829834126 |
| SG0558     | TcCLB.508525.60   | 0.0987137674212526 |
| SG2372     | TcCLB.507035.120  | 0.0987137674212526 |
| SG4603     | TcCLB.511257.30   | 0.0987137674212526 |
| SG5021     | TcCLB.510681.20   | 0.0987137674212526 |
| SG5087     | TcCLB.508277.230  | 0.0987908743226033 |
| SG1996     | TcCLB.508909.10   | 0.0990109723669413 |
| SG2852     | TcCLB.511277.115  | 0.0990262624725283 |
| SG1784     | TcCLB.504021.100  | 0.0991761486026337 |
| SG2225     | TcCLB.509999.50   | 0.0994545510740336 |
| SG7355     | TcCLB.511421.224  | 0.0994545510740336 |
| SG3556     | TcCLB.506529.230  | 0.0997247814368647 |
| SG6616     | TcCLB.506229.60   | 0.0997247814368647 |

\*: complete statistical data and reads per kilobase million (RPKM) values can be obtained directly from the corresponding author.

TABLE V

List of differentially expressed genes (DEGs) (Representative ID from supra gene) with their respective expression cluster

| Cluster | ID               | Cluster | ID               | Cluster | ID               |
|---------|------------------|---------|------------------|---------|------------------|
| 1       | TcCLB.510583.80  | 4       | TcCLB.509201.15  | 9       | TcCLB.510609.30  |
| 1       | TcCLB.511835.10  | 4       | TcCLB.510763.30  | 9       | TcCLB.507801.114 |
| 1       | TcCLB.507753.10  | 4       | TcCLB.510603.100 | 9       | TcCLB.506885.300 |
| 1       | TcCLB.511643.110 | 4       | TcCLB.504075.10  | 9       | TcCLB.509023.140 |
| 1       | TcCLB.510787.10  | 4       | TcCLB.509063.30  | 9       | TcCLB.506727.150 |
| 1       | TcCLB.511593.40  | 4       | TcCLB.509215.40  | 9       | TcCLB.508355.114 |
| 1       | TcCLB.506289.140 | 4       | TcCLB.508823.50  | 9       | TcCLB.506257.70  |
| 1       | TcCLB.506551.10  | 4       | TcCLB.508637.150 | 9       | TcCLB.507017.130 |
| 1       | TcCLB.511401.90  | 4       | TcCLB.509065.100 | 9       | TcCLB.510219.30  |
| 1       | TcCLB.511325.40  | 4       | TcCLB.508799.70  | 9       | TcCLB.504167.40  |
| 1       | TcCLB.506279.140 | 4       | TcCLB.506195.90  | 9       | TcCLB.506931.70  |
| 1       | TcCLB.506989.300 | 4       | TcCLB.508405.50  | 9       | TcCLB.507011.110 |
| 1       | TcCLB.511657.20  | 4       | TcCLB.503555.40  | 9       | TcCLB.508593.40  |
| 1       | TcCLB.510581.9   | 4       | TcCLB.509599.100 | 9       | TcCLB.509453.20  |
| 1       | TcCLB.511575.130 | 4       | TcCLB.508501.190 | 9       | TcCLB.506265.110 |
| 1       | TcCLB.506153.10  | 4       | TcCLB.511277.539 | 9       | TcCLB.511511.20  |
| 1       | TcCLB.509599.130 | 4       | TcCLB.506581.10  | 9       | TcCLB.503651.49  |
| 1       | TcCLB.508499.39  | 4       | TcCLB.508177.100 | 9       | TcCLB.511003.90  |
| 1       | TcCLB.511385.110 | 4       | TcCLB.506443.70  | 9       | TcCLB.508479.300 |
| 1       | TcCLB.511253.31  | 4       | TcCLB.509795.30  | 10      | TcCLB.508625.160 |
| 1       | TcCLB.508621.10  | 4       | TcCLB.510667.60  | 10      | TcCLB.506811.50  |
| 1       | TcCLB.509237.120 | 4       | TcCLB.510655.80  | 10      | TcCLB.511727.14  |
| 1       | TcCLB.504255.30  | 4       | TcCLB.510659.44  | 10      | TcCLB.511509.30  |
| 1       | TcCLB.504053.10  | 4       | TcCLB.424123.40  | 10      | TcCLB.511269.50  |
| 1       | TcCLB.506775.30  | 4       | TcCLB.503449.14  | 10      | TcCLB.511517.160 |
| 1       | TcCLB.507659.20  | 4       | TcCLB.510615.10  | 10      | TcCLB.503525.4   |



| Cluster | ID               | Cluster | ID               | Cluster | ID               |
|---------|------------------|---------|------------------|---------|------------------|
| 1       | TcCLB.504625.70  | 4       | TcCLB.510943.30  | 10      | TcCLB.509105.4   |
| 1       | TcCLB.509029.40  | 4       | TcCLB.510039.64  | 10      | TcCLB.509023.90  |
| 1       | TcCLB.511583.10  | 4       | TcCLB.503735.40  | 10      | TcCLB.506475.90  |
| 1       | TcCLB.506989.30  | 4       | TcCLB.507049.100 | 10      | TcCLB.511151.54  |
| 1       | TcCLB.510359.290 | 4       | TcCLB.506835.40  | 10      | TcCLB.508741.340 |
| 1       | TcCLB.510729.230 | 4       | TcCLB.509539.44  | 10      | TcCLB.503415.40  |
| 1       | TcCLB.509429.160 | 4       | TcCLB.509055.50  | 10      | TcCLB.509937.130 |
| 1       | TcCLB.504105.160 | 4       | TcCLB.508405.90  | 10      | TcCLB.506905.30  |
| 1       | TcCLB.511907.30  | 4       | TcCLB.508859.80  | 10      | TcCLB.506009.40  |
| 1       | TcCLB.510155.10  | 4       | TcCLB.511281.40  | 10      | TcCLB.511289.90  |
| 1       | TcCLB.507817.80  | 4       | TcCLB.504001.20  | 10      | TcCLB.510691.10  |
| 1       | TcCLB.503465.40  | 4       | TcCLB.509561.70  | 10      | TcCLB.509769.30  |
| 1       | TcCLB.508909.10  | 4       | TcCLB.510661.244 | 10      | TcCLB.509683.80  |
| 1       | TcCLB.503879.110 | 4       | TcCLB.503923.30  | 10      | TcCLB.510657.20  |
| 1       | TcCLB.510735.40  | 4       | TcCLB.506181.90  | 10      | TcCLB.510425.28  |
| 1       | TcCLB.510155.160 | 4       | TcCLB.506583.30  | 10      | TcCLB.511277.140 |
| 1       | TcCLB.509429.280 | 4       | TcCLB.508153.820 | 10      | TcCLB.508231.60  |
| 1       | TcCLB.507049.60  | 4       | TcCLB.506355.130 | 10      | TcCLB.509331.150 |
| 1       | TcCLB.509207.80  | 4       | TcCLB.506443.40  | 10      | TcCLB.510045.20  |
| 1       | TcCLB.504003.30  | 4       | TcCLB.510993.10  | 10      | TcCLB.503917.7   |
| 1       | TcCLB.506825.100 | 4       | TcCLB.511653.40  | 10      | TcCLB.511003.200 |
| 1       | TcCLB.421619.10  | 4       | TcCLB.503521.60  | 10      | TcCLB.511867.130 |
| 1       | TcCLB.503595.10  | 4       | TcCLB.504129.40  | 10      | TcCLB.504147.190 |
| 1       | TcCLB.506175.50  | 4       | TcCLB.510395.20  | 10      | TcCLB.504149.100 |
| 1       | TcCLB.508973.60  | 4       | TcCLB.508593.30  | 10      | TcCLB.511807.130 |
| 1       | TcCLB.510409.20  | 4       | TcCLB.506221.120 | 10      | TcCLB.511725.170 |
| 1       | TcCLB.508269.40  | 4       | TcCLB.506195.300 | 10      | TcCLB.508613.10  |
| 1       | TcCLB.508917.20  | 4       | TcCLB.504085.20  | 11      | TcCLB.511911.90  |
| 1       | TcCLB.507275.40  | 4       | TcCLB.511821.110 | 11      | TcCLB.509239.10  |
| 1       | TcCLB.511761.50  | 4       | TcCLB.511807.64  | 11      | TcCLB.509639.10  |
| 1       | TcCLB.511127.340 | 4       | TcCLB.508981.20  | 11      | TcCLB.506201.70  |
| 1       | TcCLB.511903.170 | 4       | TcCLB.511499.59  | 11      | TcCLB.506107.10  |
| 1       | TcCLB.508919.94  | 4       | TcCLB.506289.60  | 11      | TcCLB.509999.120 |
| 1       | TcCLB.509879.40  | 4       | TcCLB.510349.20  | 11      | TcCLB.503571.19  |
| 1       | TcCLB.509713.30  | 4       | TcCLB.507159.14  | 11      | TcCLB.458241.10  |
| 1       | TcCLB.506999.180 | 4       | TcCLB.510665.30  | 11      | TcCLB.507009.30  |
| 1       | TcCLB.506301.20  | 4       | TcCLB.509749.30  | 11      | TcCLB.506559.129 |
| 1       | TcCLB.506825.10  | 4       | TcCLB.509717.34  | 11      | TcCLB.511303.40  |
| 1       | TcCLB.510155.94  | 4       | TcCLB.510303.60  | 11      | TcCLB.507715.10  |
| 1       | TcCLB.510339.90  | 4       | TcCLB.511635.30  | 11      | TcCLB.509049.30  |
| 1       | TcCLB.510877.170 | 4       | TcCLB.509599.120 | 11      | TcCLB.511821.170 |
| 1       | TcCLB.504021.74  | 4       | TcCLB.506529.50  | 11      | TcCLB.508065.70  |
| 1       | TcCLB.511285.40  | 4       | TcCLB.511181.20  | 11      | TcCLB.506851.10  |
| 1       | TcCLB.503747.40  | 4       | TcCLB.508153.454 | 11      | TcCLB.510145.10  |
| 1       | TcCLB.508153.270 | 4       | TcCLB.511903.134 | 11      | TcCLB.509237.90  |
| 1       | TcCLB.511277.100 | 4       | TcCLB.507023.50  | 11      | TcCLB.504199.10  |
| 1       | TcCLB.504243.40  | 4       | TcCLB.508817.10  | 11      | TcCLB.507811.30  |
| 1       | TcCLB.509791.60  | 4       | TcCLB.509179.80  | 11      | TcCLB.508645.40  |
| 1       | TcCLB.510829.10  | 4       | TcCLB.510397.10  | 11      | TcCLB.510007.50  |
| 1       | TcCLB.508891.30  | 4       | TcCLB.507711.50  | 11      | TcCLB.506009.10  |
| 1       | TcCLB.511181.80  | 4       | TcCLB.511031.40  | 11      | TcCLB.509835.10  |
| 1       | TcCLB.506263.40  | 4       | TcCLB.509509.50  | 11      | TcCLB.503975.50  |
| 1       | TcCLB.503945.40  | 4       | TcCLB.508547.140 | 11      | TcCLB.511857.10  |

| Cluster | ID               | Cluster | ID                | Cluster | ID               |
|---------|------------------|---------|-------------------|---------|------------------|
| 1       | TcCLB.511165.100 | 4       | TcCLB.507007.74   | 11      | TcCLB.509573.10  |
| 1       | TcCLB.510659.270 | 4       | TcCLB.508577.140  | 11      | TcCLB.506959.70  |
| 1       | TcCLB.507765.20  | 4       | TcCLB.507857.10   | 11      | TcCLB.509717.60  |
| 1       | TcCLB.509537.50  | 4       | TcCLB.507951.140  | 11      | TcCLB.509001.20  |
| 1       | TcCLB.511431.54  | 4       | TcCLB.506627.110  | 11      | TcCLB.509053.30  |
| 1       | TcCLB.505071.140 | 4       | TcCLB.510329.330  | 11      | TcCLB.511865.40  |
| 1       | TcCLB.508823.20  | 4       | TcCLB.503925.90   | 11      | TcCLB.508443.30  |
| 1       | TcCLB.511017.25  | 4       | TcCLB.509237.50   | 11      | TcCLB.508999.260 |
| 1       | TcCLB.507943.60  | 4       | TcCLB.506777.20   | 11      | TcCLB.508999.250 |
| 1       | TcCLB.506775.180 | 4       | TcCLB.508231.200  | 11      | TcCLB.509937.220 |
| 1       | TcCLB.508943.20  | 4       | TcCLB.507017.70   | 11      | TcCLB.511761.10  |
| 1       | TcCLB.509569.40  | 4       | TcCLB.506975.20   | 11      | TcCLB.506477.60  |
| 1       | TcCLB.506735.40  | 4       | TcCLB.510065.40   | 11      | TcCLB.509937.160 |
| 1       | TcCLB.509151.90  | 4       | TcCLB.508153.620  | 11      | TcCLB.507143.60  |
| 1       | TcCLB.507491.70  | 4       | TcCLB.509045.20   | 11      | TcCLB.508153.260 |
| 1       | TcCLB.506181.10  | 4       | TcCLB.511209.60   | 11      | TcCLB.507241.30  |
| 1       | TcCLB.510007.20  | 4       | TcCLB.506435.110  | 11      | TcCLB.509109.160 |
| 1       | TcCLB.511181.60  | 4       | TcCLB.503829.10   | 11      | TcCLB.507515.90  |
| 1       | TcCLB.467287.10  | 4       | TcCLB.504069.90   | 11      | TcCLB.503939.50  |
| 1       | TcCLB.503943.14  | 4       | TcCLB.508577.80   | 11      | TcCLB.509563.10  |
| 1       | TcCLB.503975.100 | 4       | TcCLB.510667.10   | 11      | TcCLB.504125.100 |
| 1       | TcCLB.510575.210 | 4       | TcCLB.509715.40   | 11      | TcCLB.504137.50  |
| 1       | TcCLB.508641.180 | 4       | TcCLB.511389.130  | 11      | TcCLB.503999.100 |
| 1       | TcCLB.510719.120 | 4       | TcCLB.509065.140  | 11      | TcCLB.508593.130 |
| 1       | TcCLB.503955.100 | 4       | TcCLB.509161.20   | 11      | TcCLB.503409.10  |
| 1       | TcCLB.511153.70  | 4       | TcCLB.510339.54   | 11      | TcCLB.511383.80  |
| 1       | TcCLB.506229.64  | 4       | TcCLB.507519.164  | 11      | TcCLB.503465.10  |
| 1       | TcCLB.509733.70  | 4       | TcCLB.508737.150  | 11      | TcCLB.509099.130 |
| 1       | TcCLB.508153.520 | 4       | TcCLB.511819.30   | 11      | TcCLB.506797.110 |
| 1       | TcCLB.507063.130 | 4       | TcCLB.510421.270  | 11      | TcCLB.506573.50  |
| 1       | TcCLB.506871.180 | 4       | TcCLB.508153.920  | 11      | TcCLB.508661.70  |
| 1       | TcCLB.509997.60  | 4       | TcCLB.503995.50   | 11      | TcCLB.509607.70  |
| 1       | TcCLB.508277.340 | 4       | TcCLB.507061.34   | 11      | TcCLB.511127.180 |
| 1       | TcCLB.511633.79  | 4       | TcCLB.503929.20   | 11      | TcCLB.506773.90  |
| 1       | TcCLB.508983.20  | 4       | TcCLB.508175.90   | 11      | TcCLB.509695.100 |
| 1       | TcCLB.504117.50  | 4       | TcCLB.509789.40   | 11      | TcCLB.508409.160 |
| 1       | TcCLB.504213.100 | 4       | TcCLB.507017.64   | 11      | TcCLB.509023.50  |
| 1       | TcCLB.511189.70  | 4       | TcCLB.508153.164  | 11      | TcCLB.506399.80  |
| 1       | TcCLB.506285.30  | 4       | TcCLB.511353.50   | 11      | TcCLB.503975.70  |
| 1       | TcCLB.510599.70  | 4       | TcCLB.508817.140  | 11      | TcCLB.506691.60  |
| 1       | TcCLB.445635.10  | 4       | TcCLB.508661.10   | 11      | TcCLB.509229.60  |
| 1       | TcCLB.506925.310 | 4       | TcCLB.511719.30   | 11      | TcCLB.508669.10  |
| 1       | TcCLB.509703.10  | 4       | TcCLB.509859.50   | 11      | TcCLB.511857.50  |
| 1       | TcCLB.503865.60  | 4       | TcCLB.508153.1140 | 11      | TcCLB.504199.20  |
| 1       | TcCLB.507629.39  | 4       | TcCLB.511635.40   | 11      | TcCLB.511759.40  |
| 1       | TcCLB.427247.10  | 4       | TcCLB.509337.19   | 11      | TcCLB.508231.190 |
| 1       | TcCLB.510901.170 | 4       | TcCLB.507787.140  | 11      | TcCLB.510575.20  |
| 1       | TcCLB.511909.30  | 4       | TcCLB.510359.170  | 11      | TcCLB.510581.20  |
| 1       | TcCLB.503461.20  | 4       | TcCLB.506925.390  | 11      | TcCLB.507963.10  |
| 1       | TcCLB.507949.250 | 4       | TcCLB.407335.9    | 11      | TcCLB.508257.30  |
| 1       | TcCLB.508461.240 | 4       | TcCLB.507019.83   | 11      | TcCLB.511649.100 |
| 1       | TcCLB.506985.50  | 4       | TcCLB.507251.10   | 11      | TcCLB.511481.70  |
| 1       | TcCLB.510901.230 | 4       | TcCLB.506925.510  | 11      | TcCLB.509937.50  |

| Cluster | ID               | Cluster | ID                | Cluster | ID               |
|---------|------------------|---------|-------------------|---------|------------------|
| 1       | TcCLB.506335.130 | 4       | TcCLB.508307.170  | 11      | TcCLB.508817.110 |
| 1       | TcCLB.503413.4   | 4       | TcCLB.510761.30   | 11      | TcCLB.511287.130 |
| 1       | TcCLB.511367.199 | 4       | TcCLB.510431.230  | 11      | TcCLB.508257.70  |
| 1       | TcCLB.511367.170 | 4       | TcCLB.508307.150  | 11      | TcCLB.506681.40  |
| 1       | TcCLB.506247.190 | 4       | TcCLB.509895.20   | 11      | TcCLB.506491.10  |
| 1       | TcCLB.508667.40  | 4       | TcCLB.507641.140  | 11      | TcCLB.511295.60  |
| 1       | TcCLB.506679.20  | 4       | TcCLB.504147.260  | 11      | TcCLB.507031.140 |
| 1       | TcCLB.511367.240 | 4       | TcCLB.508837.160  | 11      | TcCLB.509003.40  |
| 1       | TcCLB.511277.180 | 4       | TcCLB.506625.70   | 11      | TcCLB.506791.10  |
| 1       | TcCLB.509907.60  | 4       | TcCLB.506925.540  | 11      | TcCLB.509003.30  |
| 2       | TcCLB.509065.60  | 4       | TcCLB.508813.80   | 11      | TcCLB.511025.80  |
| 2       | TcCLB.510663.19  | 4       | TcCLB.510187.250  | 11      | TcCLB.511167.60  |
| 2       | TcCLB.510719.20  | 4       | TcCLB.510187.280  | 11      | TcCLB.506963.70  |
| 2       | TcCLB.510003.20  | 4       | TcCLB.506977.80   | 11      | TcCLB.511511.150 |
| 2       | TcCLB.506629.220 | 4       | TcCLB.508173.70   | 11      | TcCLB.509055.44  |
| 2       | TcCLB.503531.40  | 4       | TcCLB.508173.100  | 11      | TcCLB.509109.30  |
| 2       | TcCLB.506743.4   | 4       | TcCLB.508547.50   | 11      | TcCLB.509029.80  |
| 2       | TcCLB.504069.56  | 4       | TcCLB.510873.10   | 11      | TcCLB.508461.40  |
| 2       | TcCLB.508901.10  | 4       | TcCLB.506627.100  | 11      | TcCLB.510143.120 |
| 2       | TcCLB.511899.40  | 4       | TcCLB.510901.30   | 11      | TcCLB.503559.70  |
| 2       | TcCLB.506201.110 | 4       | TcCLB.508153.184  | 11      | TcCLB.510301.30  |
| 2       | TcCLB.510099.120 | 4       | TcCLB.508479.350  | 11      | TcCLB.504253.40  |
| 2       | TcCLB.504949.30  | 4       | TcCLB.510187.480  | 11      | TcCLB.503703.30  |
| 2       | TcCLB.510647.30  | 4       | TcCLB.510687.120  | 11      | TcCLB.511517.30  |
| 2       | TcCLB.504003.70  | 4       | TcCLB.508547.190  | 11      | TcCLB.508273.30  |
| 2       | TcCLB.506727.140 | 4       | TcCLB.508479.274  | 11      | TcCLB.506709.10  |
| 2       | TcCLB.505183.30  | 4       | TcCLB.510689.30   | 11      | TcCLB.506009.20  |
| 2       | TcCLB.509943.30  | 4       | TcCLB.507019.30   | 11      | TcCLB.507609.40  |
| 2       | TcCLB.509693.80  | 4       | TcCLB.511907.270  | 11      | TcCLB.510423.50  |
| 2       | TcCLB.511903.45  | 4       | TcCLB.508257.180  | 11      | TcCLB.503823.120 |
| 2       | TcCLB.504021.100 | 4       | TcCLB.510687.70   | 11      | TcCLB.427789.20  |
| 2       | TcCLB.509551.70  | 4       | TcCLB.511727.140  | 11      | TcCLB.503795.10  |
| 2       | TcCLB.510285.20  | 4       | TcCLB.504109.140  | 11      | TcCLB.507853.10  |
| 2       | TcCLB.507057.40  | 4       | TcCLB.510087.100  | 11      | TcCLB.508601.90  |
| 2       | TcCLB.507583.20  | 4       | TcCLB.511725.174  | 11      | TcCLB.510823.30  |
| 2       | TcCLB.507895.140 | 4       | TcCLB.510187.380  | 11      | TcCLB.506479.120 |
| 2       | TcCLB.509505.40  | 4       | TcCLB.508173.180  | 11      | TcCLB.506871.70  |
| 2       | TcCLB.511025.70  | 4       | TcCLB.507019.60   | 11      | TcCLB.504073.20  |
| 2       | TcCLB.507801.130 | 4       | TcCLB.511249.44   | 11      | TcCLB.511407.40  |
| 2       | TcCLB.504431.30  | 5       | TcCLB.510571.30   | 11      | TcCLB.510507.50  |
| 2       | TcCLB.509053.70  | 5       | TcCLB.509921.51   | 11      | TcCLB.511517.164 |
| 2       | TcCLB.506581.30  | 5       | TcCLB.508823.10   | 11      | TcCLB.507305.40  |
| 2       | TcCLB.507659.10  | 5       | TcCLB.508851.200  | 11      | TcCLB.507737.20  |
| 2       | TcCLB.509207.90  | 5       | TcCLB.506579.10   | 11      | TcCLB.506477.20  |
| 2       | TcCLB.506211.250 | 5       | TcCLB.509643.100  | 11      | TcCLB.506503.4   |
| 2       | TcCLB.508269.60  | 5       | TcCLB.503773.24   | 11      | TcCLB.504087.10  |
| 2       | TcCLB.511529.68  | 5       | TcCLB.511229.50   | 11      | TcCLB.511825.240 |
| 2       | TcCLB.508905.30  | 5       | TcCLB.509059.50   | 11      | TcCLB.511257.30  |
| 2       | TcCLB.506985.40  | 5       | TcCLB.508153.1100 | 11      | TcCLB.506789.270 |
| 2       | TcCLB.509499.4   | 5       | TcCLB.508689.20   | 11      | TcCLB.511389.110 |
| 2       | TcCLB.507251.20  | 5       | TcCLB.506295.130  | 11      | TcCLB.511167.110 |
| 2       | TcCLB.510149.140 | 5       | TcCLB.503687.30   | 11      | TcCLB.507711.90  |
| 2       | TcCLB.510421.140 | 5       | TcCLB.507831.60   | 11      | TcCLB.508263.30  |

| Cluster | ID               | Cluster | ID               | Cluster | ID               |
|---------|------------------|---------|------------------|---------|------------------|
| 2       | TcCLB.505171.60  | 5       | TcCLB.508707.160 | 11      | TcCLB.508777.40  |
| 2       | TcCLB.509033.80  | 5       | TcCLB.506629.20  | 11      | TcCLB.506727.110 |
| 2       | TcCLB.509859.40  | 5       | TcCLB.509267.40  | 11      | TcCLB.506821.80  |
| 2       | TcCLB.511321.60  | 5       | TcCLB.503625.10  | 11      | TcCLB.509463.10  |
| 2       | TcCLB.505999.70  | 5       | TcCLB.508577.130 | 11      | TcCLB.508851.160 |
| 2       | TcCLB.511815.40  | 5       | TcCLB.511847.50  | 11      | TcCLB.503617.31  |
| 2       | TcCLB.508153.640 | 5       | TcCLB.508625.130 | 11      | TcCLB.508445.90  |
| 2       | TcCLB.511239.110 | 5       | TcCLB.511289.70  | 11      | TcCLB.503411.10  |
| 2       | TcCLB.511151.20  | 5       | TcCLB.511383.50  | 11      | TcCLB.505945.60  |
| 2       | TcCLB.507057.30  | 5       | TcCLB.505183.84  | 11      | TcCLB.511165.80  |
| 2       | TcCLB.510357.80  | 5       | TcCLB.508999.40  | 11      | TcCLB.506991.10  |
| 2       | TcCLB.510445.50  | 5       | TcCLB.511257.10  | 11      | TcCLB.403875.10  |
| 2       | TcCLB.508909.20  | 5       | TcCLB.511353.10  | 11      | TcCLB.508799.150 |
| 2       | TcCLB.510001.10  | 5       | TcCLB.506925.190 | 11      | TcCLB.508507.40  |
| 2       | TcCLB.509717.100 | 5       | TcCLB.509831.33  | 11      | TcCLB.508707.10  |
| 2       | TcCLB.510899.50  | 5       | TcCLB.507105.50  | 11      | TcCLB.509859.30  |
| 2       | TcCLB.506529.30  | 5       | TcCLB.506925.14  | 11      | TcCLB.506305.29  |
| 2       | TcCLB.506821.110 | 5       | TcCLB.508173.264 | 11      | TcCLB.508387.100 |
| 2       | TcCLB.510667.80  | 5       | TcCLB.508173.40  | 11      | TcCLB.506025.40  |
| 2       | TcCLB.507031.29  | 5       | TcCLB.504131.60  | 11      | TcCLB.510421.180 |
| 2       | TcCLB.511529.170 | 5       | TcCLB.506629.40  | 11      | TcCLB.506543.10  |
| 2       | TcCLB.511287.90  | 5       | TcCLB.510821.60  | 11      | TcCLB.510735.90  |
| 2       | TcCLB.508175.39  | 5       | TcCLB.506321.280 | 11      | TcCLB.507677.150 |
| 2       | TcCLB.509499.10  | 5       | TcCLB.511725.250 | 11      | TcCLB.504229.110 |
| 2       | TcCLB.510655.130 | 6       | TcCLB.506435.370 | 11      | TcCLB.503571.10  |
| 2       | TcCLB.508741.170 | 6       | TcCLB.505699.10  | 11      | TcCLB.511285.30  |
| 2       | TcCLB.505983.20  | 6       | TcCLB.504015.30  | 11      | TcCLB.511653.20  |
| 2       | TcCLB.508699.40  | 6       | TcCLB.506499.105 | 11      | TcCLB.508965.39  |
| 2       | TcCLB.511529.160 | 6       | TcCLB.510795.10  | 11      | TcCLB.509695.50  |
| 2       | TcCLB.510031.70  | 6       | TcCLB.506355.100 | 11      | TcCLB.510663.40  |
| 2       | TcCLB.503465.30  | 6       | TcCLB.510065.10  | 11      | TcCLB.504741.250 |
| 2       | TcCLB.507017.40  | 6       | TcCLB.506789.334 | 11      | TcCLB.509229.10  |
| 2       | TcCLB.509051.40  | 6       | TcCLB.508671.20  | 11      | TcCLB.509791.30  |
| 2       | TcCLB.506413.70  | 6       | TcCLB.506469.80  | 11      | TcCLB.510305.70  |
| 2       | TcCLB.511761.60  | 6       | TcCLB.504223.20  | 11      | TcCLB.509179.130 |
| 2       | TcCLB.503681.20  | 6       | TcCLB.511757.70  | 11      | TcCLB.510729.140 |
| 2       | TcCLB.507951.170 | 6       | TcCLB.505999.10  | 11      | TcCLB.504021.20  |
| 2       | TcCLB.510155.20  | 6       | TcCLB.504191.10  | 11      | TcCLB.511903.90  |
| 2       | TcCLB.510257.24  | 6       | TcCLB.508015.10  | 11      | TcCLB.507089.30  |
| 2       | TcCLB.506195.100 | 6       | TcCLB.507951.299 | 11      | TcCLB.509775.9   |
| 2       | TcCLB.503891.40  | 6       | TcCLB.508909.330 | 11      | TcCLB.511545.140 |
| 2       | TcCLB.509471.30  | 6       | TcCLB.508461.80  | 11      | TcCLB.506241.80  |
| 2       | TcCLB.504013.55  | 6       | TcCLB.485683.10  | 11      | TcCLB.506297.350 |
| 2       | TcCLB.508351.40  | 6       | TcCLB.506405.140 | 11      | TcCLB.511323.60  |
| 2       | TcCLB.510091.100 | 6       | TcCLB.504019.3   | 11      | TcCLB.508211.50  |
| 2       | TcCLB.508409.199 | 6       | TcCLB.506825.70  | 11      | TcCLB.509999.140 |
| 2       | TcCLB.511459.50  | 6       | TcCLB.509601.140 | 11      | TcCLB.506559.524 |
| 2       | TcCLB.511823.70  | 6       | TcCLB.504173.30  | 11      | TcCLB.506529.400 |
| 2       | TcCLB.511545.170 | 6       | TcCLB.511217.120 | 11      | TcCLB.506529.595 |
| 2       | TcCLB.508501.250 | 6       | TcCLB.506825.200 | 11      | TcCLB.511545.80  |
| 2       | TcCLB.508543.120 | 6       | TcCLB.503565.29  | 11      | TcCLB.506925.10  |
| 2       | TcCLB.511825.20  | 6       | TcCLB.503515.14  | 11      | TcCLB.503955.80  |
| 2       | TcCLB.506821.90  | 6       | TcCLB.511647.10  | 11      | TcCLB.506289.80  |

| Cluster | ID               | Cluster | ID               | Cluster | ID                |
|---------|------------------|---------|------------------|---------|-------------------|
| 2       | TcCLB.509643.70  | 6       | TcCLB.504149.175 | 11      | TcCLB.504147.240  |
| 2       | TcCLB.511211.210 | 6       | TcCLB.510149.120 | 11      | TcCLB.504147.110  |
| 2       | TcCLB.506503.60  | 6       | TcCLB.508399.10  | 11      | TcCLB.504125.60   |
| 2       | TcCLB.510357.90  | 6       | TcCLB.504153.30  | 11      | TcCLB.504423.15   |
| 2       | TcCLB.511033.20  | 6       | TcCLB.505071.90  | 11      | TcCLB.510297.119  |
| 2       | TcCLB.507003.50  | 6       | TcCLB.503943.20  | 11      | TcCLB.503975.40   |
| 2       | TcCLB.507081.130 | 6       | TcCLB.511805.20  | 11      | TcCLB.506625.230  |
| 2       | TcCLB.509937.20  | 6       | TcCLB.508193.60  | 11      | TcCLB.508257.220  |
| 2       | TcCLB.509179.70  | 6       | TcCLB.509901.100 | 11      | TcCLB.511389.80   |
| 2       | TcCLB.510859.10  | 6       | TcCLB.507851.70  | 11      | TcCLB.507019.20   |
| 2       | TcCLB.503925.80  | 6       | TcCLB.506625.120 | 11      | TcCLB.506577.5    |
| 2       | TcCLB.506945.240 | 6       | TcCLB.506195.290 | 11      | TcCLB.506175.120  |
| 2       | TcCLB.482097.20  | 6       | TcCLB.509683.20  | 11      | TcCLB.509647.50   |
| 2       | TcCLB.507641.50  | 6       | TcCLB.507081.110 | 11      | TcCLB.510129.20   |
| 2       | TcCLB.511215.50  | 6       | TcCLB.511593.20  | 11      | TcCLB.506679.80   |
| 2       | TcCLB.506795.70  | 6       | TcCLB.509755.50  | 11      | TcCLB.506619.30   |
| 2       | TcCLB.508813.60  | 6       | TcCLB.511517.130 | 11      | TcCLB.511295.20   |
| 2       | TcCLB.506945.200 | 6       | TcCLB.506755.50  | 11      | TcCLB.510889.100  |
| 2       | TcCLB.510859.17  | 6       | TcCLB.507519.150 | 11      | TcCLB.511391.120  |
| 2       | TcCLB.507099.30  | 6       | TcCLB.511277.60  | 11      | TcCLB.510329.210  |
| 2       | TcCLB.506553.20  | 6       | TcCLB.509109.140 | 11      | TcCLB.510303.200  |
| 2       | TcCLB.511421.210 | 6       | TcCLB.506475.113 | 11      | TcCLB.511019.80   |
| 2       | TcCLB.503419.50  | 6       | TcCLB.506241.160 | 11      | TcCLB.511727.210  |
| 2       | TcCLB.511807.150 | 6       | TcCLB.509937.170 | 11      | TcCLB.508879.160  |
| 2       | TcCLB.511367.60  | 6       | TcCLB.509161.10  | 11      | TcCLB.506559.434  |
| 2       | TcCLB.508971.30  | 6       | TcCLB.508307.180 | 11      | TcCLB.510329.70   |
| 2       | TcCLB.508409.110 | 6       | TcCLB.506315.80  | 12      | TcCLB.510275.255  |
| 2       | TcCLB.511367.138 | 6       | TcCLB.508111.30  | 12      | TcCLB.507059.60   |
| 2       | TcCLB.506247.50  | 6       | TcCLB.503617.10  | 12      | TcCLB.504797.140  |
| 2       | TcCLB.508799.240 | 6       | TcCLB.506303.60  | 12      | TcCLB.508153.1050 |
| 2       | TcCLB.504071.60  | 6       | TcCLB.511759.30  | 12      | TcCLB.508821.50   |
| 2       | TcCLB.508815.120 | 6       | TcCLB.511827.100 | 12      | TcCLB.506357.130  |
| 2       | TcCLB.511491.70  | 6       | TcCLB.511909.70  | 12      | TcCLB.508961.20   |
| 2       | TcCLB.508799.10  | 6       | TcCLB.506193.60  | 12      | TcCLB.504113.30   |
| 2       | TcCLB.507209.10  | 6       | TcCLB.510335.10  | 12      | TcCLB.508153.1110 |
| 2       | TcCLB.508461.410 | 6       | TcCLB.508737.70  | 12      | TcCLB.509601.20   |
| 2       | TcCLB.509105.90  | 6       | TcCLB.510333.10  | 12      | TcCLB.511649.94   |
| 3       | TcCLB.503731.9   | 6       | TcCLB.503697.70  | 12      | TcCLB.506739.200  |
| 3       | TcCLB.506871.20  | 6       | TcCLB.509599.60  | 12      | TcCLB.509945.24   |
| 3       | TcCLB.504023.10  | 6       | TcCLB.510667.120 | 12      | TcCLB.507951.70   |
| 3       | TcCLB.506287.80  | 6       | TcCLB.510303.50  | 12      | TcCLB.511353.69   |
| 3       | TcCLB.508411.50  | 6       | TcCLB.503459.10  | 12      | TcCLB.507031.64   |
| 3       | TcCLB.504051.40  | 6       | TcCLB.507775.10  | 12      | TcCLB.509167.20   |
| 3       | TcCLB.509617.40  | 6       | TcCLB.503431.90  | 12      | TcCLB.508637.120  |
| 3       | TcCLB.507669.110 | 6       | TcCLB.506989.10  | 12      | TcCLB.509631.160  |
| 3       | TcCLB.507715.20  | 6       | TcCLB.402863.9   | 12      | TcCLB.509717.30   |
| 3       | TcCLB.508707.130 | 6       | TcCLB.510357.10  | 12      | TcCLB.511529.50   |
| 3       | TcCLB.509207.120 | 6       | TcCLB.503653.60  | 12      | TcCLB.510797.20   |
| 3       | TcCLB.507021.50  | 6       | TcCLB.511411.16  | 12      | TcCLB.511355.30   |
| 3       | TcCLB.510101.480 | 6       | TcCLB.506999.120 | 12      | TcCLB.503987.39   |
| 3       | TcCLB.509213.110 | 6       | TcCLB.508965.70  | 12      | TcCLB.510443.30   |
| 3       | TcCLB.507093.40  | 6       | TcCLB.506123.30  | 12      | TcCLB.511021.90   |
| 3       | TcCLB.511307.20  | 6       | TcCLB.507031.90  | 12      | TcCLB.506975.63   |

| Cluster | ID               | Cluster | ID               | Cluster | ID               |
|---------|------------------|---------|------------------|---------|------------------|
| 3       | TcCLB.509595.30  | 6       | TcCLB.511249.110 | 12      | TcCLB.507049.20  |
| 3       | TcCLB.510689.80  | 6       | TcCLB.506229.10  | 12      | TcCLB.506553.10  |
| 3       | TcCLB.506401.280 | 6       | TcCLB.503939.20  | 12      | TcCLB.508641.184 |
| 3       | TcCLB.511167.20  | 6       | TcCLB.508989.110 | 12      | TcCLB.506175.10  |
| 3       | TcCLB.506425.80  | 6       | TcCLB.510155.50  | 12      | TcCLB.508613.30  |
| 3       | TcCLB.508741.380 | 6       | TcCLB.511559.50  | 12      | TcCLB.510691.70  |
| 3       | TcCLB.510155.115 | 6       | TcCLB.507793.20  | 12      | TcCLB.508717.36  |
| 3       | TcCLB.506855.130 | 6       | TcCLB.503599.10  | 12      | TcCLB.507913.20  |
| 3       | TcCLB.511907.240 | 6       | TcCLB.503781.30  | 12      | TcCLB.507047.140 |
| 3       | TcCLB.510225.40  | 6       | TcCLB.510877.140 | 12      | TcCLB.511283.124 |
| 3       | TcCLB.506825.80  | 6       | TcCLB.504427.50  | 12      | TcCLB.511361.10  |
| 3       | TcCLB.510887.30  | 6       | TcCLB.511165.40  | 12      | TcCLB.503579.40  |
| 3       | TcCLB.508857.140 | 6       | TcCLB.508461.310 | 12      | TcCLB.509229.130 |
| 3       | TcCLB.508831.66  | 6       | TcCLB.510339.100 | 12      | TcCLB.509109.114 |
| 3       | TcCLB.509429.130 | 6       | TcCLB.506635.139 | 12      | TcCLB.504161.50  |
| 3       | TcCLB.509791.90  | 6       | TcCLB.505073.10  | 12      | TcCLB.506363.110 |
| 3       | TcCLB.503923.10  | 6       | TcCLB.509007.50  | 12      | TcCLB.511729.60  |
| 3       | TcCLB.510861.70  | 6       | TcCLB.441241.10  | 12      | TcCLB.507007.45  |
| 3       | TcCLB.504125.64  | 6       | TcCLB.504153.140 | 12      | TcCLB.509429.120 |
| 3       | TcCLB.511289.50  | 6       | TcCLB.506227.150 | 12      | TcCLB.511745.60  |
| 3       | TcCLB.508153.680 | 6       | TcCLB.506625.190 | 12      | TcCLB.509319.20  |
| 3       | TcCLB.510517.60  | 6       | TcCLB.511439.70  | 12      | TcCLB.506713.14  |
| 3       | TcCLB.504255.20  | 6       | TcCLB.505683.5   | 12      | TcCLB.506123.24  |
| 3       | TcCLB.510099.30  | 6       | TcCLB.511211.70  | 12      | TcCLB.505997.200 |
| 3       | TcCLB.510311.30  | 6       | TcCLB.510977.9   | 12      | TcCLB.436521.9   |
| 3       | TcCLB.507491.119 | 6       | TcCLB.511391.110 | 12      | TcCLB.510323.60  |
| 3       | TcCLB.506327.80  | 6       | TcCLB.506993.160 | 12      | TcCLB.511903.20  |
| 3       | TcCLB.509835.30  | 6       | TcCLB.506679.70  | 12      | TcCLB.506855.350 |
| 3       | TcCLB.509799.20  | 6       | TcCLB.507681.200 | 12      | TcCLB.503809.75  |
| 3       | TcCLB.510421.310 | 6       | TcCLB.511491.40  | 12      | TcCLB.509799.60  |
| 3       | TcCLB.511253.20  | 6       | TcCLB.508017.30  | 12      | TcCLB.504797.80  |
| 3       | TcCLB.507515.120 | 6       | TcCLB.511003.160 | 12      | TcCLB.508273.70  |
| 3       | TcCLB.508207.250 | 6       | TcCLB.511807.125 | 12      | TcCLB.509253.30  |
| 3       | TcCLB.508917.30  | 6       | TcCLB.509003.70  | 12      | TcCLB.506275.20  |
| 3       | TcCLB.506593.40  | 6       | TcCLB.511367.210 | 12      | TcCLB.506297.140 |
| 3       | TcCLB.510221.20  | 6       | TcCLB.511809.10  | 12      | TcCLB.511649.150 |
| 3       | TcCLB.510661.190 | 6       | TcCLB.504071.110 | 12      | TcCLB.510879.180 |
| 3       | TcCLB.504111.10  | 6       | TcCLB.509527.120 | 12      | TcCLB.511421.170 |
| 3       | TcCLB.508741.370 | 6       | TcCLB.511807.190 | 12      | TcCLB.510091.110 |
| 3       | TcCLB.507143.80  | 6       | TcCLB.508863.10  | 12      | TcCLB.510743.10  |
| 3       | TcCLB.503733.30  | 6       | TcCLB.511259.50  | 12      | TcCLB.508647.174 |
| 3       | TcCLB.507023.180 | 6       | TcCLB.511367.159 | 12      | TcCLB.506411.25  |
| 3       | TcCLB.511001.70  | 6       | TcCLB.509647.180 | 12      | TcCLB.508687.25  |
| 3       | TcCLB.503715.40  | 6       | TcCLB.511317.50  | 12      | TcCLB.506977.60  |
| 3       | TcCLB.511465.20  | 6       | TcCLB.511885.50  | 12      | TcCLB.511283.184 |
| 3       | TcCLB.511159.14  | 6       | TcCLB.506317.10  | 12      | TcCLB.508479.310 |
| 3       | TcCLB.510311.100 | 6       | TcCLB.511511.5   | 12      | TcCLB.509105.130 |
| 3       | TcCLB.506841.20  | 7       | TcCLB.504125.80  | 12      | TcCLB.510187.290 |
| 3       | TcCLB.509791.100 | 7       | TcCLB.508909.300 | 12      | TcCLB.507053.170 |
| 3       | TcCLB.508637.160 | 7       | TcCLB.508707.50  | 12      | TcCLB.506445.100 |
| 3       | TcCLB.504153.260 | 7       | TcCLB.508593.100 | 12      | TcCLB.508823.60  |
| 3       | TcCLB.509705.10  | 7       | TcCLB.509099.150 | 12      | TcCLB.504071.40  |
| 3       | TcCLB.510431.140 | 7       | TcCLB.506195.150 | 12      | TcCLB.508707.200 |

| Cluster | ID               | Cluster | ID               | Cluster | ID               |
|---------|------------------|---------|------------------|---------|------------------|
| 3       | TcCLB.507093.160 | 7       | TcCLB.509777.60  | 12      | TcCLB.511725.134 |
| 3       | TcCLB.509013.10  | 7       | TcCLB.509671.160 | 12      | TcCLB.508479.370 |
| 3       | TcCLB.506885.90  | 7       | TcCLB.510305.40  | 12      | TcCLB.511655.20  |
| 3       | TcCLB.510513.70  | 7       | TcCLB.503679.30  | 12      | TcCLB.507053.20  |
| 3       | TcCLB.509267.20  | 7       | TcCLB.507317.20  | 12      | TcCLB.510799.60  |
| 3       | TcCLB.503479.70  | 7       | TcCLB.507927.80  | 12      | TcCLB.503603.10  |
| 3       | TcCLB.504057.130 | 7       | TcCLB.506885.60  | 12      | TcCLB.506247.40  |
| 3       | TcCLB.510901.180 | 7       | TcCLB.510733.50  |         |                  |
| 3       | TcCLB.508827.110 | 7       | TcCLB.511317.70  |         |                  |
| 3       | TcCLB.506791.20  | 7       | TcCLB.506419.10  |         |                  |
| 3       | TcCLB.509857.40  | 8       | TcCLB.510217.10  |         |                  |
| 3       | TcCLB.511511.3   | 8       | TcCLB.510783.20  |         |                  |
| 3       | TcCLB.507073.30  | 8       | TcCLB.506375.100 |         |                  |
| 3       | TcCLB.508461.350 | 8       | TcCLB.507485.100 |         |                  |
| 3       | TcCLB.511727.230 | 8       | TcCLB.509799.50  |         |                  |
| 3       | TcCLB.511283.240 | 8       | TcCLB.510039.80  |         |                  |
| 3       | TcCLB.511725.230 | 8       | TcCLB.503891.120 |         |                  |
| 3       | TcCLB.510187.400 | 8       | TcCLB.509137.10  |         |                  |
| 3       | TcCLB.508871.140 | 8       | TcCLB.503955.89  |         |                  |
|         |                  | 8       | TcCLB.508727.24  |         |                  |
|         |                  | 8       | TcCLB.511003.30  |         |                  |
|         |                  | 8       | TcCLB.507053.209 |         |                  |
|         |                  | 8       | TcCLB.506559.550 |         |                  |



TABLE VI  
Summary of analysis of expression of RNA-binding proteins (RBPs) partners in *Trypanosoma cruzi* growth curve

| RBP           | Supra gene | Representative ID | DEG (present data) | Parasite stage               | TcCLB partners (from literature) | Non-redundant partners (present work supergenes) | Non DEGs (%) | False discovery rates (FDR) 5% |                            |                          |           |
|---------------|------------|-------------------|--------------------|------------------------------|----------------------------------|--------------------------------------------------|--------------|--------------------------------|----------------------------|--------------------------|-----------|
|               |            |                   |                    |                              |                                  |                                                  |              | DEGs in both (%)               | DEGs in total RNA only (%) | DEGs in P/G RNA only (%) | Total (%) |
| Dhh1          | SG2469     | TcCLB.510997.50   | No                 | Epi                          | 204                              | 128                                              | 90           | 4,69                           | 1,56                       | 3,13                     | 9,38      |
| EF-1 $\alpha$ | SG0113     | TcCLB.511367.360  | No                 | Epi                          | 85                               | 77                                               | 80           | 2,60                           | 6,49                       | 11,69                    | 20,78     |
| EF-1 $\alpha$ | SG0113     | TcCLB.511367.360  | No                 | Epi under nutritional stress | 133                              | 125                                              | 60           | 16,80                          | 15,20                      | 8,00                     | 40,00     |
| NRBD1         | SG6635     | TcCLB.511727.270  | No                 | Epi                          | 142                              | 139                                              | 75           | 12,23                          | 7,19                       | 5,04                     | 24,46     |
| NRBD1         | SG6635     | TcCLB.511727.270  | No                 | Epi under nutritional stress | 54                               | 54                                               | 75           | 5,56                           | 9,26                       | 9,26                     | 24,07     |
| Puf6          | SG5973     | TcCLB.510125.10   | Yes (pol)          | Epi                          | 8                                | 8                                                | 50           | 0,00                           | 12,50                      | 37,50                    | 50,00     |
| RBP40         | SG2592     | TcCLB.511837.129  | No                 | Epi                          | 148                              | 145                                              | 74           | 4,14                           | 13,10                      | 8,28                     | 25,52     |
| ZC3H39        | SG1319     | TcCLB.508895.50   | No                 | Epi                          | 49                               | 46                                               | 84           | 2,17                           | 6,52                       | 6,52                     | 15,22     |
| ZC3H39        | SG1319     | TcCLB.508895.50   | No                 | Epi under nutritional stress | 199                              | 188                                              | 70           | 10,64                          | 14,36                      | 4,79                     | 29,79     |
| ZFP2          | SG4272     | TcCLB.503989.10   | No                 | Epi                          | 228                              | 222                                              | 73           | 2,70                           | 16,22                      | 7,66                     | 26,58     |

DEGs: differentially expressed genes; P/G: polysomal/granular.

Expression pattern of RBPs partners in *T. cruzi* growth curve

Groups of mRNAs associated with *Trypanosoma cruzi* RNA-binding proteins (RBPs) were retrieved from literature search: TcDHH1 (Holetz et al. 2010), TcEF-1 $\alpha$  (Alves et al. 2015), TcNRBD1 (Oliveira et al. 2016), TcPUF6 (Dallagiovanna et al. 2008), TcZC3H39 (Alves et al. 2014); ZFP2 (Mörking et al. 2012). For each RBP, partners IDs were crossed with present *T. cruzi* growth curve RNA-Seq supra genes (SGs) data using CL Brenner representative IDs. RBPs partners differentially expressed genes (DEGs) in the present data [false discovery rates (FDR) threshold of 0.05] were visualised by heat maps after Hierarchical clustering performed in MultiExperimentViewer (MeV) version 4.8.1, using the Euclidean distance and average linkage clustering metrics. As can be seen in Supplementary data (Table VI), only TcPUF6 mRNA was found modulated in our data. However, a percentage of these RBPs partners were modulated (minimum of 9,4% of Dhh1 partners and maximum of 50% of PUF6 partners). The expression pattern of DEGs are presented in Supplementary data (Figs 1-10).

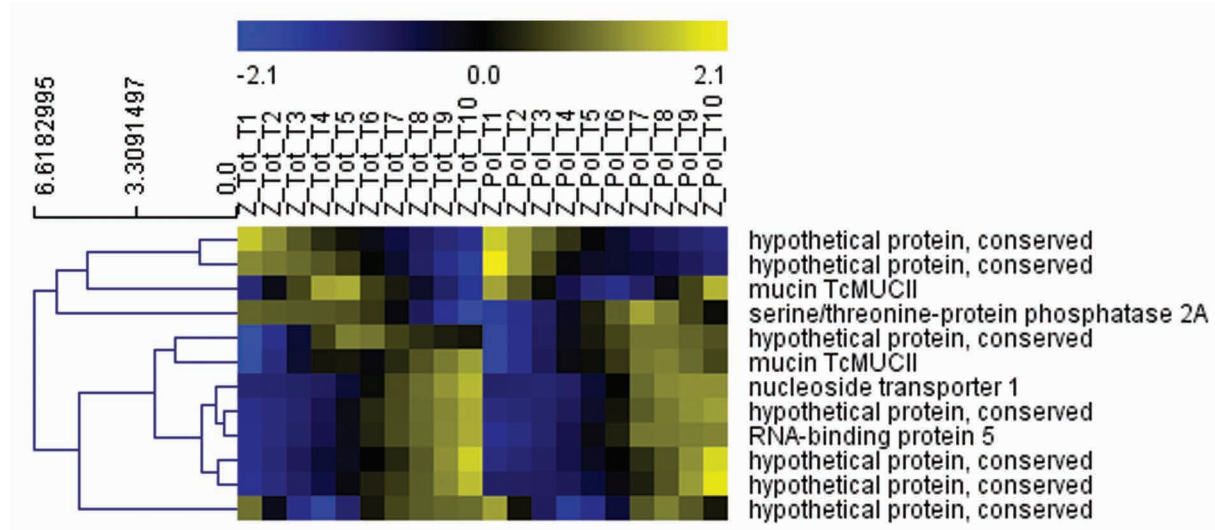

Fig. 1: Dhh1 (epimastigote). Heat map of Dhh1 partners differentially expressed genes (DEGs) (epimastigote), representing total (Tot) and polysomal/granular (P/G) modulation across the time points of the growth curve. Grades of blue and yellow represent decrease or increase, respectively, of log<sub>2</sub>-ratio time points against day 1 of the growth curve.

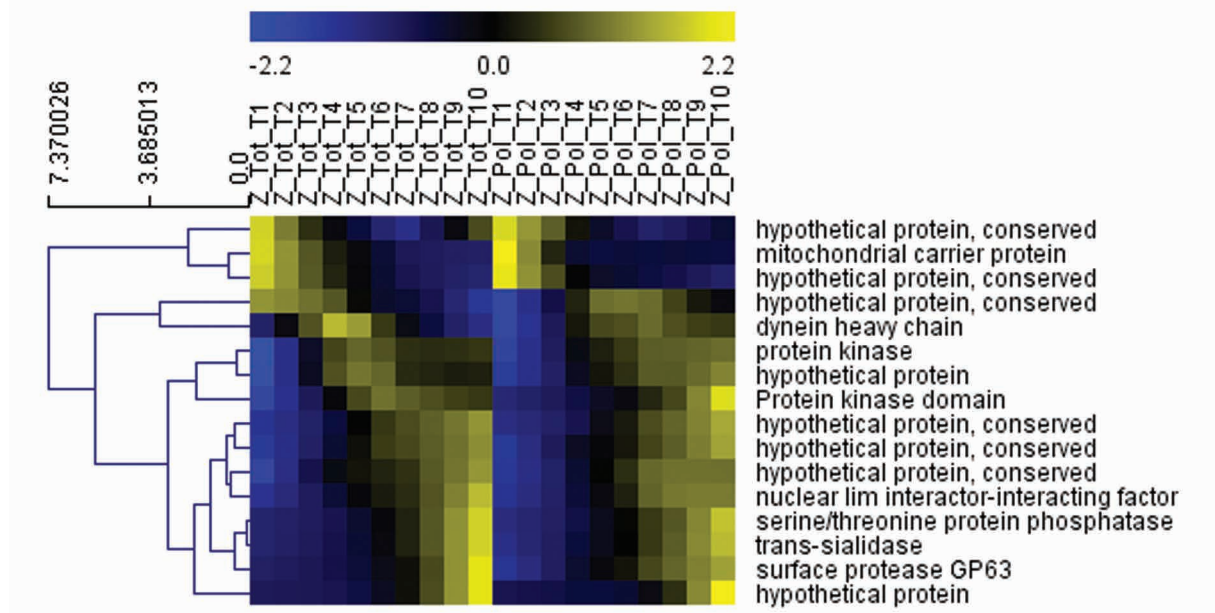

Fig. 2: EF-1 $\alpha$  (epimastigote). Heat map of EF-1 $\alpha$  partners differentially expressed genes (DEGs) (epimastigote), representing total (Tot) and polysomal/granular (P/G) modulation across the time points of the growth curve. Grades of blue and yellow represent decrease or increase, respectively, of log<sub>2</sub>-ratio time points against day 1 of the growth curve.

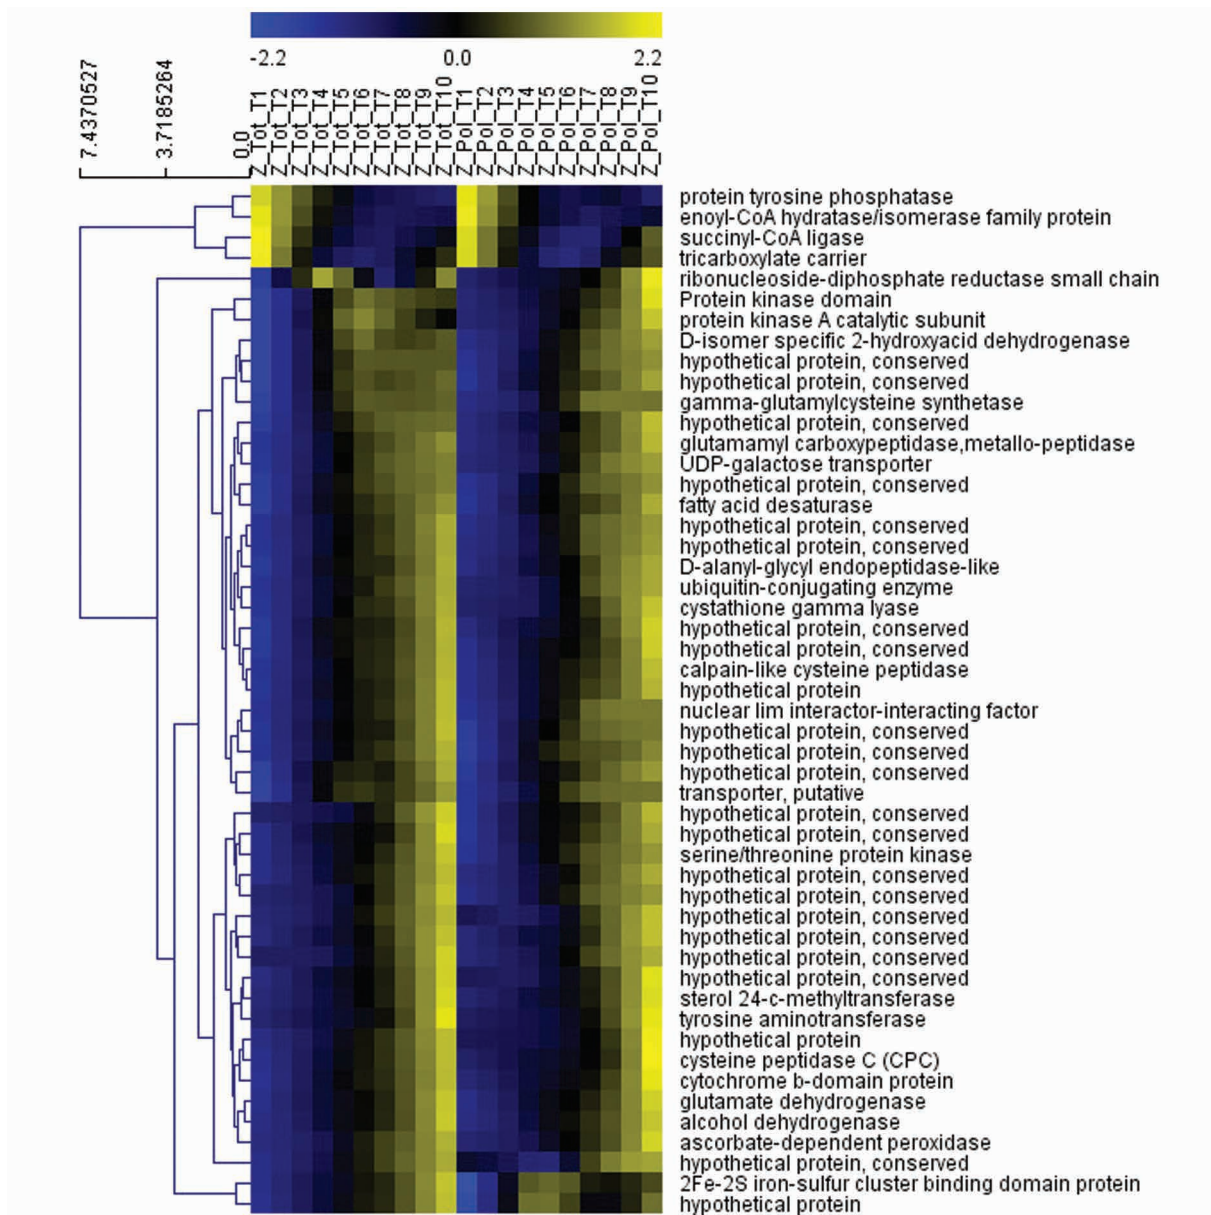

Fig. 3: EF-1a (epimastigote under nutritional stress). Heat map of EF-1a partners differentially expressed genes (DEGs) (epimastigote under nutritional stress), representing total (Tot) and polysomal/granular (P/G) modulation across the time points of the growth curve. Grades of blue and yellow represent decrease or increase, respectively, of log<sub>2</sub>-ratio time points against day 1 of the growth curve.

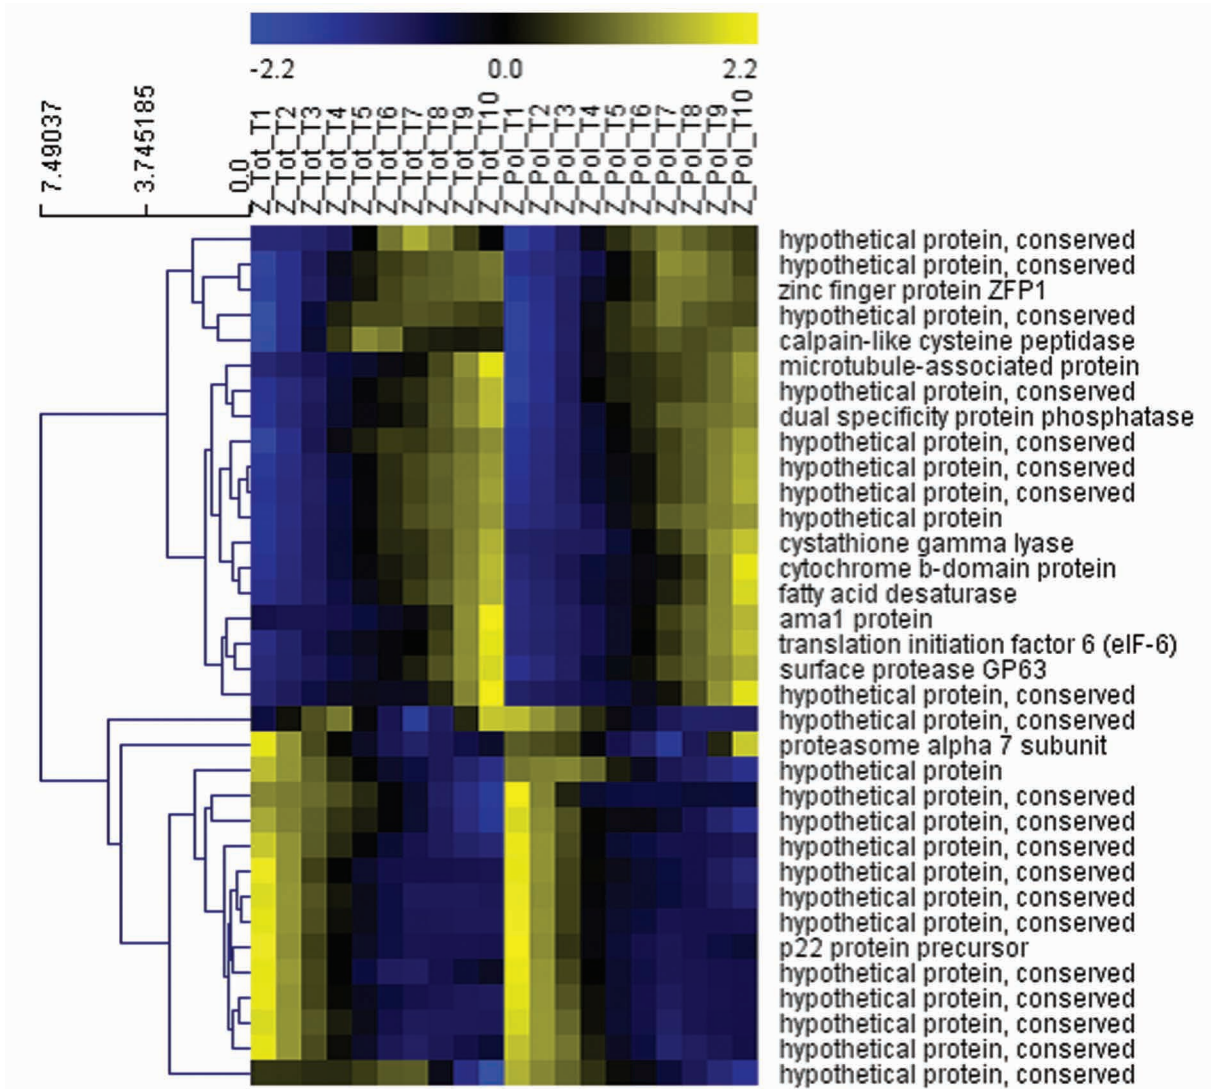

Fig. 4: NRBD1 (epimastigote). Heat map of NRBD1 partners differentially expressed genes (DEGs) (epimastigote), representing total (Tot) and polysomal/granular (P/G) modulation across the time points of the growth curve. Grades of blue and yellow represent decrease or increase, respectively, of log<sub>2</sub>-ratio time points against day 1 of the growth curve.



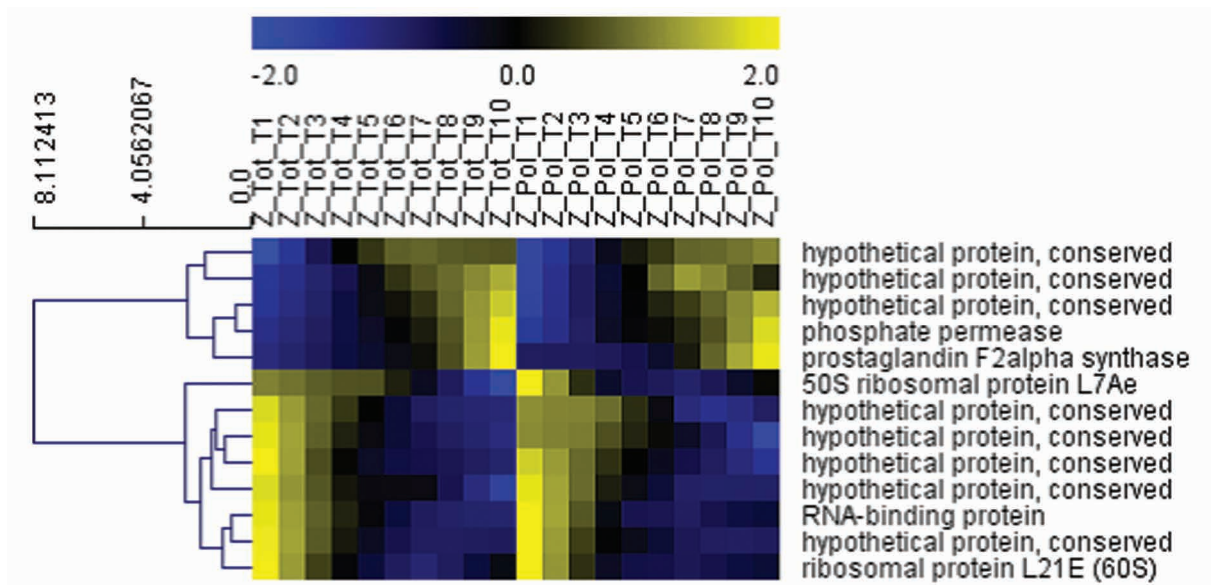

Fig. 5: NRBD1 (epimastigote under nutritional stress). Heat map of NRBD1 partners differentially expressed genes (DEGs) (epimastigote under nutritional stress), representing total (Tot) and polysomal/granular (P/G) modulation across the time points of the growth curve. Grades of blue and yellow represent decrease or increase, respectively, of log<sub>2</sub>-ratio time points against day 1 of the growth curve.

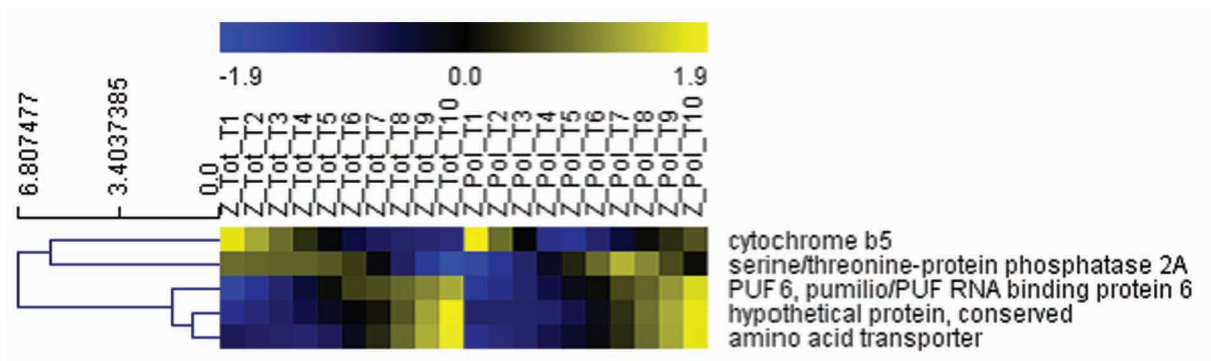

Fig. 6: PUF6 (epimastigote). Heat map of PUF6 partners differentially expressed genes (DEGs) (epimastigote), representing total (Tot) and polysomal/granular (P/G) modulation across the time points of the growth curve. Grades of blue and yellow represent decrease or increase, respectively, of log<sub>2</sub>-ratio time points against day 1 of the growth curve.

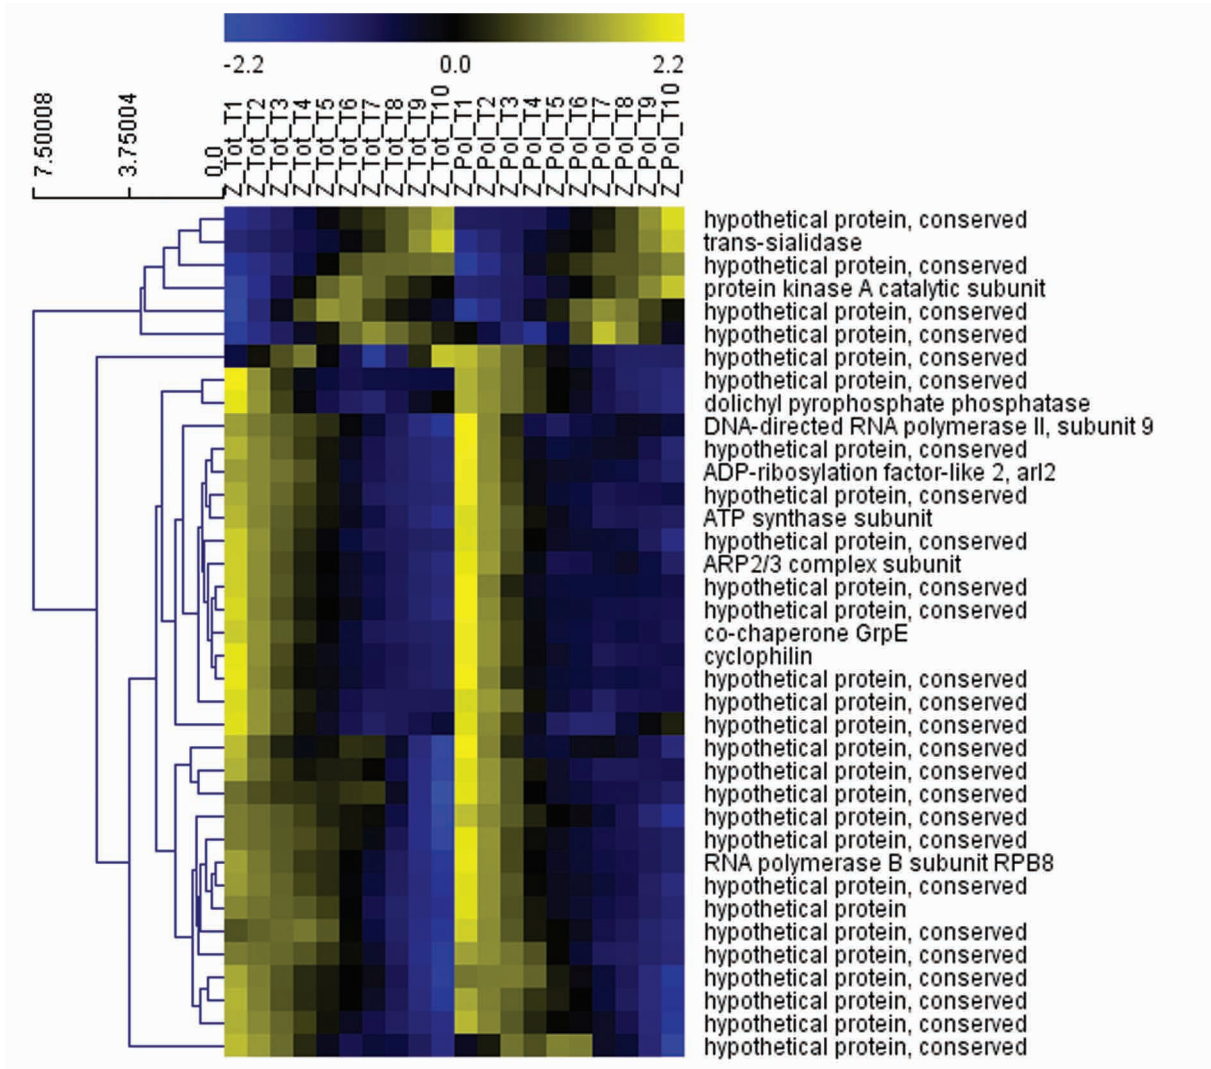

Fig. 7: RBP40 (epimastigote). Heat map of RBP40 partners differentially expressed genes (DEGs) (epimastigote), representing total (Tot) and polysomal/granular (P/G) modulation across the time points of the growth curve. Grades of blue and yellow represent decrease or increase, respectively, of log<sub>2</sub>-ratio time points against day 1 of the growth curve.

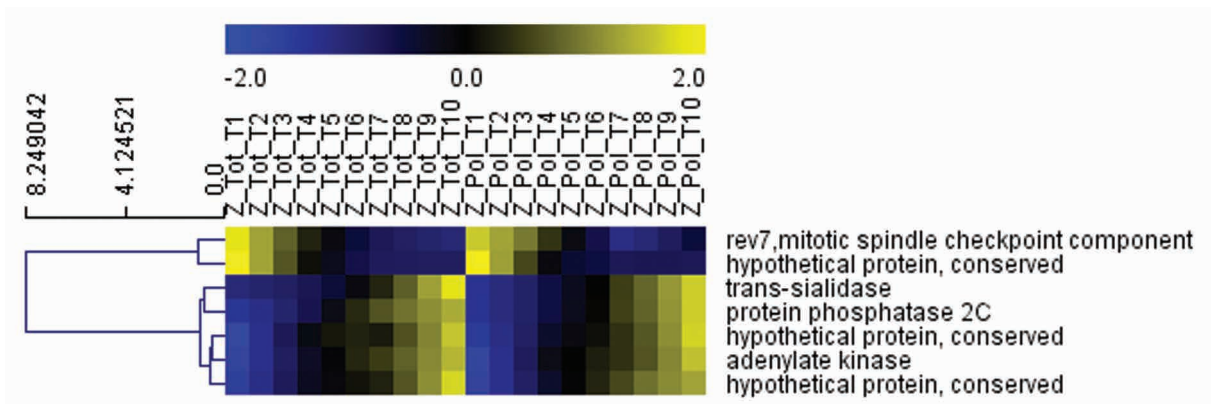

Fig. 8: ZC3H39 (epimastigote). Heat map of ZC3H39 partners differentially expressed genes (DEGs) (epimastigote), representing total (Tot) and polysomal/granular (P/G) modulation across the time points of the growth curve. Grades of blue and yellow represent decrease or increase, respectively, of log<sub>2</sub>-ratio time points against day 1 of the growth curve.

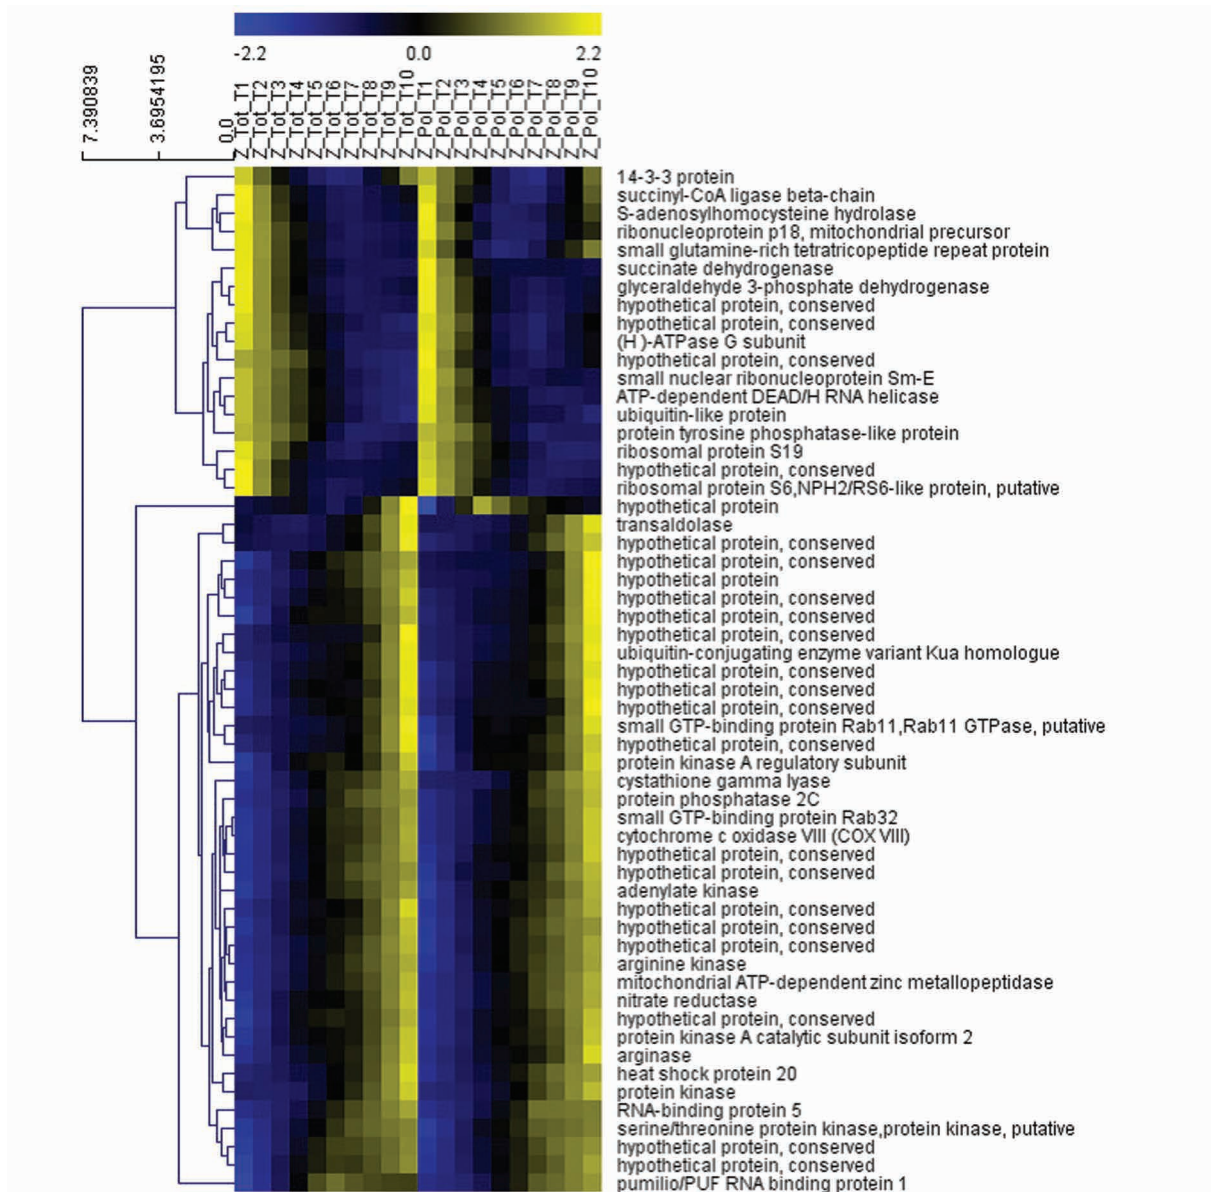

Fig. 9: ZC3H39 (epimastigote under nutritional stress). Heat map of ZC3H39 partners differentially expressed genes (DEGs) (epimastigote under nutritional stress), representing total (Tot) and polysomal/granular (P/G) modulation across the time points of the growth curve. Grades of blue and yellow represent decrease or increase, respectively, of log<sub>2</sub>-ratio time points against day 1 of the growth curve.



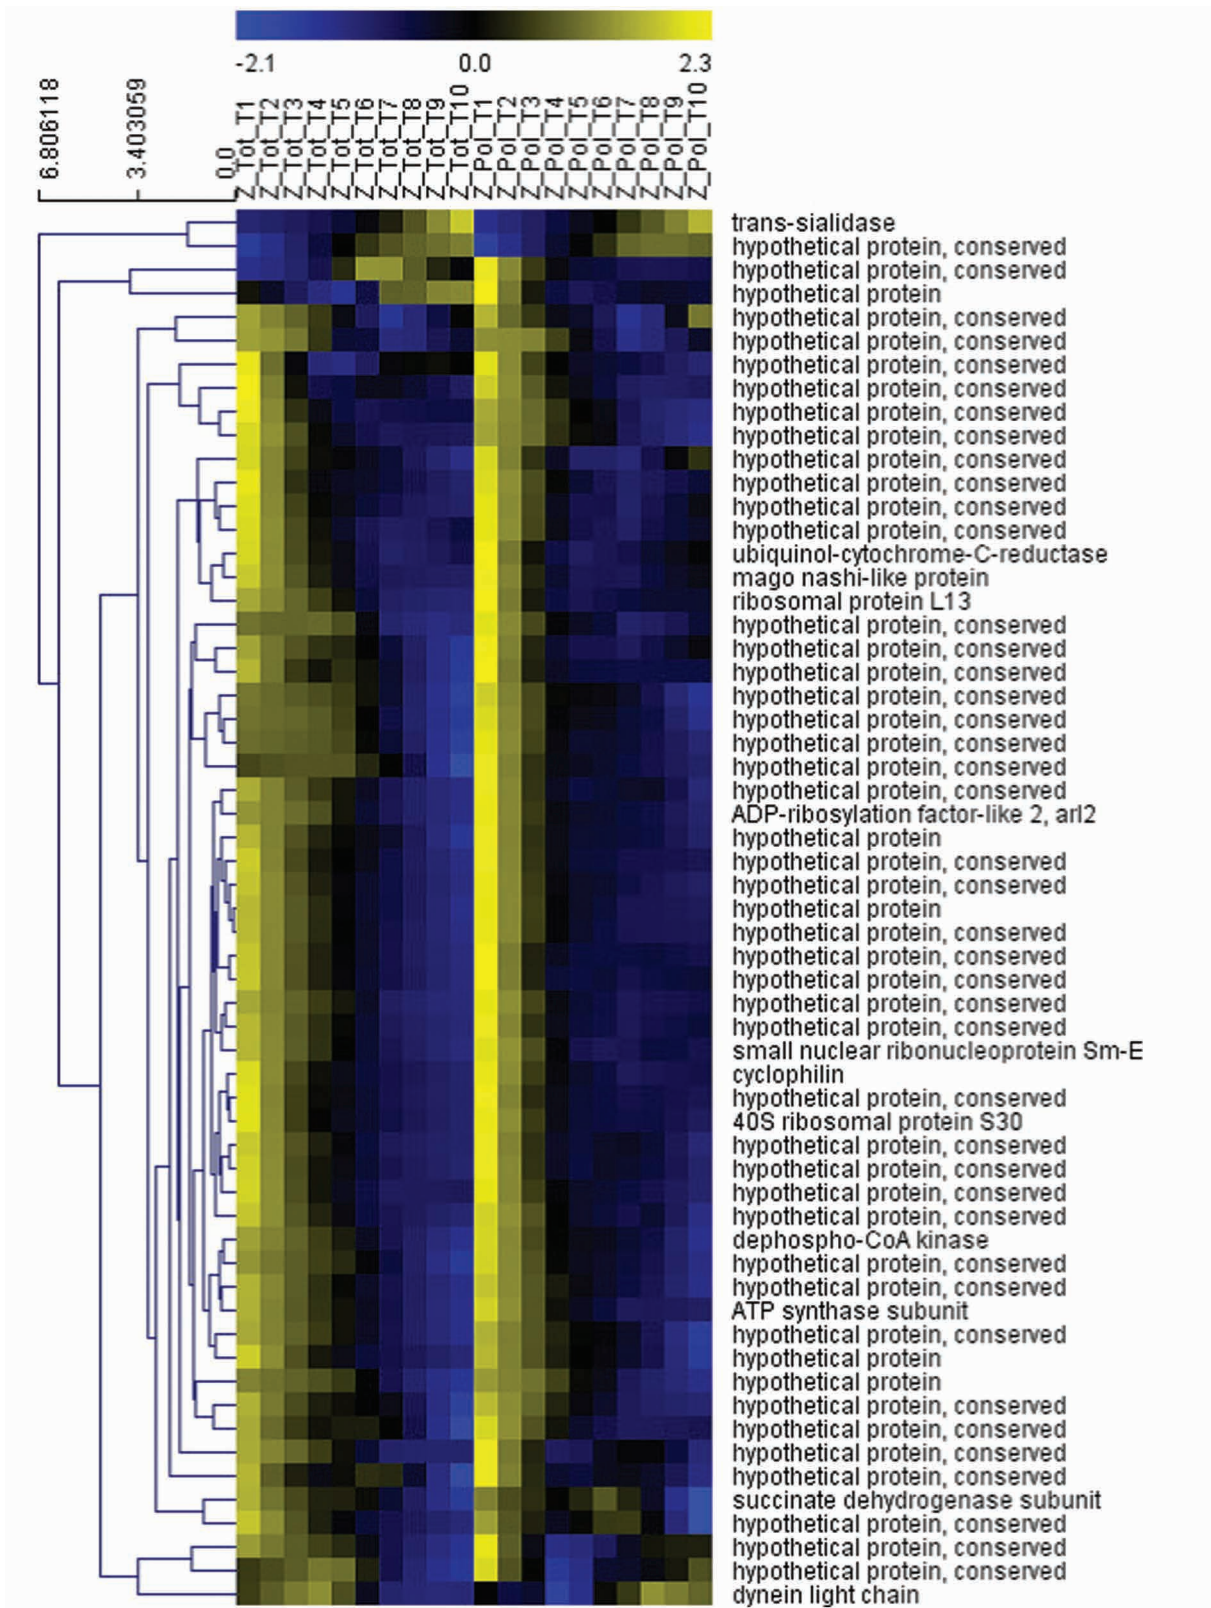

Fig. 10: ZFP2 (epimastigote). Heat map of ZFP2 partners differentially expressed genes (DEGs) (epimastigote), representing total (Tot) and polysomal/granular (P/G) modulation across the time points of the growth curve. Grades of blue and yellow represent decrease or increase, respectively, of log<sub>2</sub>-ratio time points against day 1 of the growth curve.

## REFERENCES

- Alves LR, Oliveira C, Goldenberg S. Eukaryotic translation elongation factor-1 alpha is associated with a specific subset of mRNAs in *Trypanosoma cruzi*. *BMC Microbiol.* 2015; 15: 104.
- Alves LR, Oliveira C, Mörking PA, Kessler RL, Martins ST, Romagnoli BA, et al. The mRNAs associated to a zinc finger protein from *Trypanosoma cruzi* shift during stress conditions. *RNA Biol.* 2014; 11(7): 921-33.
- Dallagiovanna B, Correa A, Probst CM, Holetz F, Smircich P, de Aguiar AM, et al. Functional genomic characterization of mRNAs associated with TcPUF6, a pumilio-like protein from *Trypanosoma cruzi*. *J Biol Chem.* 2008; 283(13): 8266-73.
- Holetz FB, Alves LR, Probst CM, Dallagiovanna B, Marchini FK, Manque P, et al. Protein and mRNA content of TcDHH1-containing mRNPs in *Trypanosoma cruzi*. *FEBS J.* 2010; 277(16): 3415-26.
- Mörking PA, Rampazzo RC, Walrad P, Probst CM, Soares MJ, Gradia DF, et al. The zinc finger protein TcZFP2 binds target mRNAs enriched during *Trypanosoma cruzi* metacyclogenesis. *Mem Inst Oswaldo Cruz.* 2012; 107(6): 790-9.
- Oliveira C, Carvalho PC, Alves LR, Goldenberg S. The role of the *Trypanosoma cruzi* TcNRBD1 protein in translation. *PLoS One.* 2016; 11(10): e0164650.
